# Supplementary material for: Mechanistic study on ligand-controlled copper-catalyzed regiodivergent silacarboxylation of allenes with carbon dioxide and silylborane
Source: Royal Society of Chemistry journal article supplement (doi:10.1039/c7ra03723f), 2017-01-01
Supplement: c7ra03723f1.pdf [file c7ra03723f1.pdf]

## Supporting Information

# Mechanistic study on ligand-controlled copper-catalyzed regiodivergent silacarboxylation of allenes with carbon dioxide and silylborane

Shu-Min Han,<sup>a</sup> Xingdong Wang,<sup>b</sup> Shenhua Miao,<sup>\*a</sup> Zhang-Yu Yu<sup>a,b</sup> and Tao Liu<sup>\*a,b</sup>

<sup>a</sup> School of Chemistry and Chemical Engineering, Qufu Normal University, Qufu 273165, Shandong, China

<sup>b</sup> Department of Chemistry and Chemical Engineering, Jining University, Qufu 273155, Shandong, China

### Table of Contents:

|                                 |    |
|---------------------------------|----|
| 1. Other possible pathways----- | S2 |
| 2. Cartesian coordinates-----   | S4 |

---

\*Corresponding authors.  
E-mail address: liutao\_2005@126.com

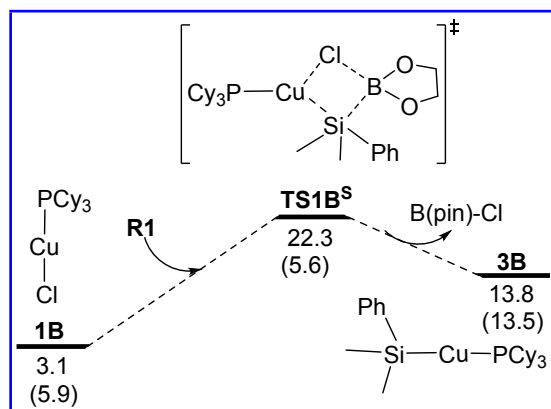

**Fig. S1.** Free energy diagrams for the disfavored transmetalation of **1B** with **R1** catalyzed by **Cu/L<sub>B</sub>**.

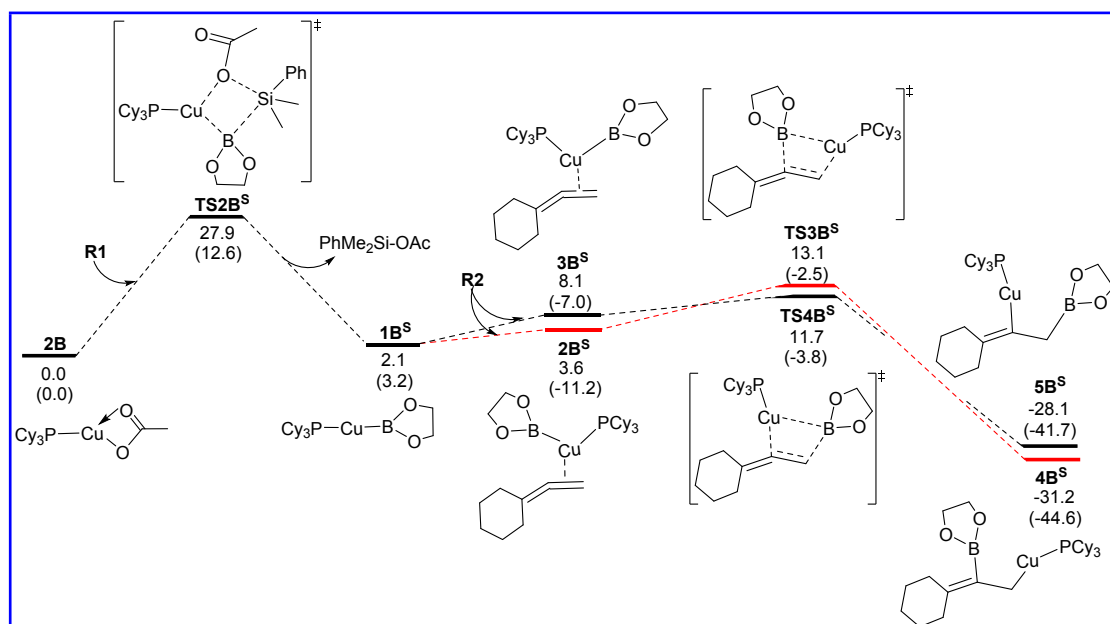

**Fig. S2.** Free energy diagrams for the disfavored pathways that **2B** reacted with **R1** catalyzed by **Cu/L<sub>B</sub>**.

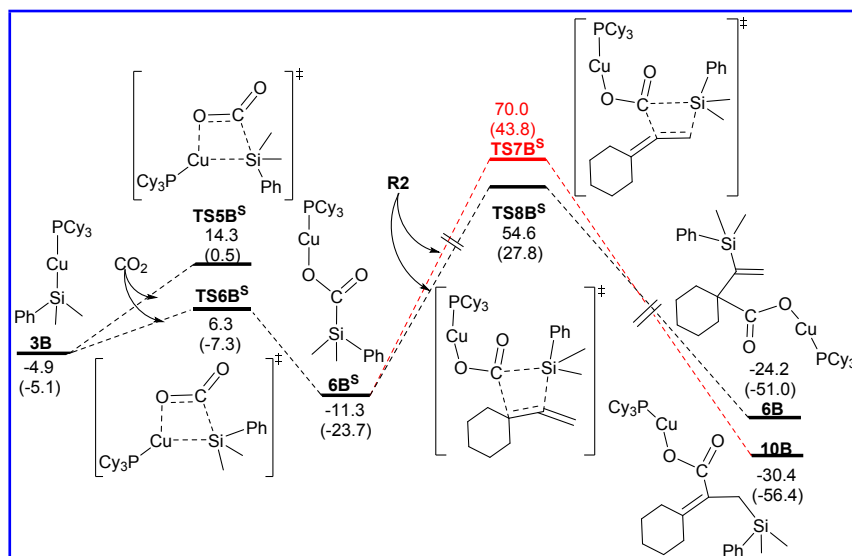

**Fig. S3.** Free energy diagrams for the disfavored pathways that **3B** reacts with  $\text{CO}_2$  firstly catalyzed by  $\text{Cu/L}_B$ .

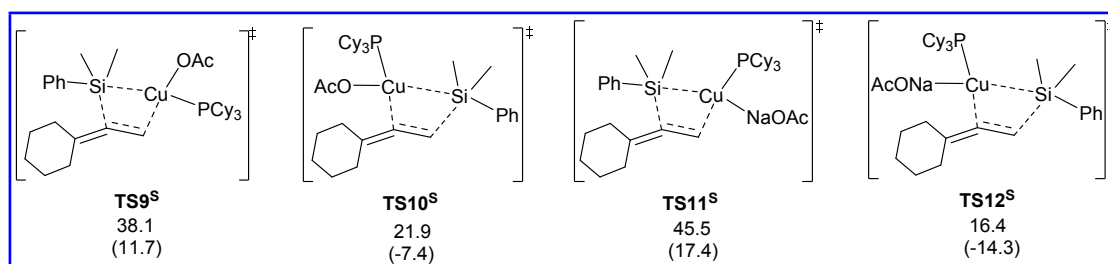

**Fig. S4.** Other transition state forms for the regioselectivity-determining step with the additive  $\text{NaOAc}$  catalyzed by  $\text{Cu/L}_B$ .

# Cartesian Coordinates and Sum of Electronic and Thermal Free Energies for All of the Calculated Structures

|                                              |              |             |             |                                              |              |             |             |
|----------------------------------------------|--------------|-------------|-------------|----------------------------------------------|--------------|-------------|-------------|
| <b>L<sub>A</sub></b>                         |              |             |             | H                                            | -2.26018100  | 0.57824100  | 3.65663300  |
| Sum of electronic and thermal Free Energies= | -1385.157490 |             |             | C                                            | -3.26904100  | -2.03689300 | -1.81333200 |
| C                                            | -2.43865000  | -0.42126600 | 1.74045400  | H                                            | -4.23234800  | -2.04854300 | -2.33802300 |
| C                                            | -3.16641500  | -0.81595800 | -0.89109000 | H                                            | -2.47783600  | -2.03940200 | -2.56956900 |
| C                                            | -4.30577900  | -0.74673700 | 0.15326700  | H                                            | -3.18598500  | -2.97061100 | -1.24628800 |
| C                                            | -3.83134500  | 0.09586200  | 1.34146600  | C                                            | 1.71634900   | -1.11627800 | -2.23830000 |
| H                                            | -2.56336000  | -1.41231600 | 2.19871000  | H                                            | 0.62785700   | -1.05860700 | -2.32134300 |
| H                                            | -3.19946600  | 0.08302500  | -1.51439600 | H                                            | 2.11723300   | -0.13027000 | -2.49239300 |
| H                                            | -5.22700100  | -0.35512600 | -0.29506800 | H                                            | 2.07216000   | -1.82950200 | -2.99219100 |
| H                                            | -4.53523000  | -1.76288100 | 0.50292600  | C                                            | 3.87349400   | -0.32554500 | 2.26672600  |
| H                                            | -3.76003400  | 1.15295000  | 1.05235200  | H                                            | 4.88853400   | 0.04642200  | 2.45182100  |
| H                                            | -4.53228600  | 0.04592700  | 2.18506600  | H                                            | 3.23965300   | -0.01312000 | 3.10200900  |
| P                                            | -1.53835200  | -0.80863000 | 0.10406700  | H                                            | 3.91298300   | -1.42010900 | 2.28318000  |
| C                                            | -0.74285300  | 0.82792000  | -0.33944100 | <b>1A</b>                                    |              |             |             |
| C                                            | 0.66613600   | 0.93911100  | -0.18771400 | Sum of electronic and thermal Free Energies= | -1868.893299 |             |             |
| C                                            | -1.45454700  | 1.92573800  | -0.84667400 | Cu                                           | -1.38098600  | -0.03286400 | 0.00000800  |
| C                                            | 1.29233800   | 2.13309500  | -0.57666600 | C                                            | 1.14007800   | 0.12822400  | -0.00003500 |
| C                                            | -0.81510600  | 3.10937800  | -1.21626100 | O                                            | 0.85337600   | 1.32621100  | -0.00000800 |
| H                                            | -2.53229600  | 1.86928000  | -0.95662400 | O                                            | 0.26329000   | -0.84598800 | -0.00003200 |
| C                                            | 0.56692400   | 3.20976900  | -1.08739700 | C                                            | 2.58124600   | -0.36227400 | 0.00001000  |
| H                                            | 2.36893400   | 2.23473000  | -0.49228300 | H                                            | 2.76183200   | -0.98512000 | 0.88099200  |
| H                                            | -1.39570700  | 3.94233500  | -1.60256200 | H                                            | 2.76147800   | -0.98664300 | -0.87995500 |
| H                                            | 1.08347000   | 4.11853900  | -1.38354800 | H                                            | 3.26401900   | 0.48732700  | -0.00080800 |
| C                                            | 2.15341200   | -1.57500800 | -0.84254100 | <b>2A</b>                                    |              |             |             |
| C                                            | 3.33719200   | 0.21200000  | 0.92853600  | Sum of electronic and thermal Free Energies= | -3254.126445 |             |             |
| C                                            | 3.69190700   | -1.63247200 | -0.69555500 | Cu                                           | 0.15038100   | 1.26355100  | -0.47411500 |
| H                                            | 1.72135800   | -2.56376500 | -0.65727800 | C                                            | 0.66328500   | 3.61676300  | -0.01427900 |
| C                                            | 4.18810800   | -0.24106800 | -0.27589000 | O                                            | 0.71792700   | 2.89891300  | 1.02023600  |
| H                                            | 3.30437800   | 1.30289200  | 1.00090100  | O                                            | 0.38140000   | 3.13864300  | -1.16585800 |
| H                                            | 3.96604200   | -2.36439600 | 0.07387400  | C                                            | 0.90986200   | 5.11344800  | 0.08084100  |
| H                                            | 4.16059900   | -1.96870800 | -1.62859300 | H                                            | 1.55304600   | 5.44429400  | -0.73911700 |
| H                                            | 5.25850200   | -0.24848000 | -0.03282100 | H                                            | -0.04263500  | 5.64550000  | -0.02067000 |
| H                                            | 4.05575100   | 0.45883200  | -1.10997500 | H                                            | 1.35755800   | 5.37279700  | 1.04148400  |
| P                                            | 1.58511400   | -0.47444700 | 0.62514300  | C                                            | -3.12125600  | 0.07085300  | -1.29899800 |
| C                                            | -1.68603800  | 0.47088500  | 2.72831300  | C                                            | -2.72313800  | 0.28438100  | 1.42810500  |
| H                                            | -0.70872700  | 0.05128800  | 2.98283200  | C                                            | -4.06477300  | 0.80946500  | 0.87370400  |
| H                                            | -1.52494900  | 1.47232200  | 2.31709900  | C                                            | -4.38183600  | 0.03034100  | -0.41132200 |

|   |             |             |             |
|---|-------------|-------------|-------------|
| H | -3.05628300 | 1.07683300  | -1.73385800 |
| H | -2.89400100 | -0.71716300 | 1.84314900  |
| H | -4.85794700 | 0.71213400  | 1.62425500  |
| H | -3.97339500 | 1.87972500  | 0.64421000  |
| H | -4.63295800 | -1.00997300 | -0.16274200 |
| H | -5.24816800 | 0.44569700  | -0.94050200 |
| P | -1.65242000 | 0.06970100  | -0.10686800 |
| C | -1.01863400 | -1.67294300 | 0.02644100  |
| C | 0.37843200  | -1.90704500 | -0.04871700 |
| C | -1.88244500 | -2.76711800 | 0.20380200  |
| C | 0.84694400  | -3.22985500 | 0.02328500  |
| C | -1.39912400 | -4.07189500 | 0.27481600  |
| H | -2.95192000 | -2.59865000 | 0.28808100  |
| C | -0.02669100 | -4.30439900 | 0.17654600  |
| H | 1.91305400  | -3.42707300 | -0.03453000 |
| H | -2.08884000 | -4.90098900 | 0.40497600  |
| H | 0.36297700  | -5.31713000 | 0.22822800  |
| C | 2.47100800  | -0.26479300 | 1.38768900  |
| C | 3.00238800  | -1.12013800 | -1.21897800 |
| C | 3.95196000  | -0.30353000 | 0.94108700  |
| H | 2.21484900  | 0.73848600  | 1.74231700  |
| C | 4.10610500  | -1.36264300 | -0.16372400 |
| H | 2.71278800  | -2.05573500 | -1.70837300 |
| H | 4.24006100  | 0.67836900  | 0.54781400  |
| H | 4.60975400  | -0.50670000 | 1.79446900  |
| H | 5.10317100  | -1.32780900 | -0.61964100 |
| H | 3.99363400  | -2.36302400 | 0.27261900  |
| P | 1.52509600  | -0.45510400 | -0.24509800 |
| C | -3.08125000 | -0.93666600 | -2.44835500 |
| H | -2.16547100 | -0.83167100 | -3.03885800 |
| H | -3.13002600 | -1.96925000 | -2.09213100 |
| H | -3.92994800 | -0.77377400 | -3.12251000 |
| C | -2.08143000 | 1.16954400  | 2.50014600  |
| H | -2.78774000 | 1.35403600  | 3.31838300  |
| H | -1.19442100 | 0.69251400  | 2.92875300  |
| H | -1.75610900 | 2.13086600  | 2.09180300  |
| C | 2.13874800  | -1.27341000 | 2.49217700  |
| H | 1.07290500  | -1.26408900 | 2.73904400  |
| H | 2.40256900  | -2.29980800 | 2.21956300  |
| H | 2.69369400  | -1.01672700 | 3.40207800  |
| C | 3.41994800  | -0.11221700 | -2.30124300 |
| H | 4.28734400  | -0.48677800 | -2.85744200 |
| H | 2.60913600  | 0.06562200  | -3.01387700 |
| H | 3.68890900  | 0.85823400  | -1.87130300 |

## R1

Sum of electronic and thermal Free Energies= -854.835556

|    |             |             |             |
|----|-------------|-------------|-------------|
| Si | 0.13499200  | 1.17796200  | 0.25267000  |
| C  | 0.13326000  | 2.60684000  | -0.99294000 |
| H  | 0.10069100  | 2.23974000  | -2.02352000 |
| H  | -0.72088800 | 3.27661800  | -0.84478200 |
| H  | 1.04343400  | 3.20637400  | -0.88516900 |
| C  | 0.15212200  | 1.88905100  | 2.01498600  |
| H  | -0.73844200 | 2.50076400  | 2.19626900  |
| H  | 0.16745400  | 1.08999400  | 2.76285400  |
| H  | 1.03227800  | 2.52060200  | 2.18016700  |
| C  | -1.41983600 | 0.11327800  | 0.01719300  |
| C  | -1.43809100 | -1.23728500 | 0.41566000  |
| C  | -2.60059800 | 0.64328300  | -0.53448500 |
| C  | -2.58601200 | -2.01919700 | 0.27856800  |
| H  | -0.53969600 | -1.68559800 | 0.83310600  |
| C  | -3.75106600 | -0.13449000 | -0.67652700 |
| H  | -2.62721000 | 1.67942800  | -0.86290700 |
| C  | -3.74635600 | -1.46898100 | -0.26835900 |
| H  | -2.57388000 | -3.05900700 | 0.59445700  |
| H  | -4.64939200 | 0.29995400  | -1.10702900 |
| H  | -4.64016900 | -2.07682900 | -0.37868000 |
| B  | 1.76304700  | -0.00463300 | -0.02492900 |
| O  | 2.04015500  | -1.10084900 | 0.75976700  |
| O  | 2.69570800  | 0.19540800  | -1.01184400 |
| C  | 3.23819700  | -1.73016800 | 0.26221600  |
| C  | 3.70816500  | -0.82443200 | -0.90196900 |
| H  | 4.67209500  | -0.34532500 | -0.70177600 |
| H  | 3.77870000  | -1.35941500 | -1.85393800 |
| H  | 3.96975700  | -1.79334100 | 1.07359800  |
| H  | 2.99452100  | -2.74613000 | -0.06484100 |

## TS1A

Sum of electronic and thermal Free Energies= -4108.906099

|    |             |             |             |
|----|-------------|-------------|-------------|
| Cu | 0.02397100  | -0.24689000 | -0.21959600 |
| C  | 0.53387700  | -2.08371100 | 2.58444200  |
| O  | -0.27236700 | -1.54434700 | 3.31910800  |
| O  | 0.84169600  | -1.52683900 | 1.39482200  |
| C  | 1.23757100  | -3.37022400 | 2.95132300  |
| H  | 0.88853900  | -4.17006300 | 2.29126500  |
| H  | 2.31482900  | -3.26906800 | 2.80623700  |
| H  | 1.00225200  | -3.62267700 | 3.98513000  |
| C  | 0.19588900  | 3.40167800  | -0.73311800 |
| C  | -0.10594800 | 2.72355300  | 1.93431100  |
| C  | 0.86169700  | 3.88305500  | 1.60703500  |

|   |             |             |             |                                                          |             |             |             |
|---|-------------|-------------|-------------|----------------------------------------------------------|-------------|-------------|-------------|
| C | 0.42157300  | 4.53317200  | 0.29086200  | H                                                        | -1.17838600 | -2.81741500 | -2.32864700 |
| H | 1.18381600  | 3.03445300  | -1.03722000 | B                                                        | 1.42768400  | -2.19273100 | 0.19591700  |
| H | -1.05363700 | 3.14316300  | 2.29479600  | O                                                        | 2.75497300  | -2.69649700 | 0.39752600  |
| H | 0.89147000  | 4.60102400  | 2.43499100  | O                                                        | 0.60915500  | -3.26535000 | -0.30158500 |
| H | 1.87701900  | 3.48276500  | 1.49252000  | C                                                        | 2.81002200  | -4.05842000 | -0.01182200 |
| H | -0.50723600 | 5.10081100  | 0.43849100  | C                                                        | 1.45936900  | -4.32889600 | -0.71446200 |
| H | 1.16817500  | 5.24524800  | -0.08142400 | H                                                        | 1.56792900  | -4.33040100 | -1.80753900 |
| P | -0.47961000 | 1.93530900  | 0.25850700  | H                                                        | 1.01871700  | -5.28887300 | -0.41930800 |
| C | -2.33075500 | 2.01068300  | 0.08094800  | H                                                        | 3.66537800  | -4.22208100 | -0.67712100 |
| C | -3.05860300 | 0.85638100  | -0.30498300 | H                                                        | 2.94122500  | -4.70094900 | 0.87060600  |
| C | -3.02810200 | 3.21767900  | 0.26591200  | Si                                                       | 2.10204000  | -0.57619400 | -1.44990600 |
| C | -4.43704100 | 0.97458600  | -0.55279800 | C                                                        | 3.32516200  | 0.67993200  | -0.68433100 |
| C | -4.39840200 | 3.31141700  | 0.03414900  | C                                                        | 3.66006100  | 1.88369300  | -1.33411700 |
| H | -2.49102600 | 4.10351300  | 0.58957700  | C                                                        | 3.92562700  | 0.43976400  | 0.56800800  |
| C | -5.10416300 | 2.18657500  | -0.39445300 | C                                                        | 4.53955900  | 2.80882400  | -0.76314000 |
| H | -5.00273200 | 0.10284000  | -0.86592500 | H                                                        | 3.23391100  | 2.10700800  | -2.30951000 |
| H | -4.90993200 | 4.25857800  | 0.17957600  | C                                                        | 4.80717900  | 1.35731200  | 1.14342200  |
| H | -6.17043500 | 2.24933200  | -0.59204000 | H                                                        | 3.70450500  | -0.48447100 | 1.09427200  |
| C | -2.85154400 | -1.83476600 | 1.02656900  | C                                                        | 5.11444300  | 2.54918600  | 0.48185800  |
| C | -3.02052500 | -1.78783400 | -1.75845300 | H                                                        | 4.77890100  | 3.72805100  | -1.29267200 |
| C | -2.98242500 | -3.20175400 | 0.31854300  | H                                                        | 5.25613500  | 1.14208300  | 2.11003300  |
| H | -2.06091400 | -1.86434800 | 1.77947200  | H                                                        | 5.79910700  | 3.26467500  | 0.92974900  |
| C | -3.70039200 | -2.97470400 | -1.02431700 | C                                                        | 3.14933800  | -1.79214000 | -2.49068900 |
| H | -3.76729000 | -1.16538000 | -2.26207100 | H                                                        | 2.52253800  | -2.54495200 | -2.98221700 |
| H | -1.98010900 | -3.60724500 | 0.13784400  | H                                                        | 3.66512000  | -1.23145600 | -3.27909800 |
| H | -3.52003100 | -3.91770200 | 0.95182400  | H                                                        | 3.90657400  | -2.30286400 | -1.89317000 |
| H | -3.67827700 | -3.87626600 | -1.64726000 | C                                                        | 1.19670100  | 0.32881700  | -2.89785100 |
| H | -4.75686400 | -2.74381800 | -0.84279800 | H                                                        | 0.53600800  | -0.38208600 | -3.40592400 |
| P | -2.19059200 | -0.77745600 | -0.39172100 | H                                                        | 0.59597200  | 1.19793800  | -2.62151600 |
| C | -0.56919500 | 3.81966700  | -1.99054400 | H                                                        | 1.93230500  | 0.65899200  | -3.64280300 |
| H | -0.69619700 | 2.98782300  | -2.68981800 | <b>B(pin)-OAc</b>                                        |             |             |             |
| H | -1.56319900 | 4.20958300  | -1.75547200 | Sum of electronic and thermal Free Energies= -482.451730 |             |             |             |
| H | -0.01635300 | 4.60798600  | -2.51440100 | O                                                        | 0.84933600  | -0.83895400 | 0.06797900  |
| C | 0.44610700  | 1.74740000  | 2.97576400  | B                                                        | -0.43137400 | -0.36174500 | 0.01633000  |
| H | 0.63321500  | 2.27516500  | 3.91871800  | O                                                        | -0.79155700 | 0.90889400  | -0.36935600 |
| H | -0.23313200 | 0.91606700  | 3.17764100  | O                                                        | -1.48610300 | -1.17488500 | 0.33453000  |
| H | 1.39411700  | 1.31706900  | 2.63713700  | C                                                        | -2.22791800 | 0.94756700  | -0.41611500 |
| C | -4.14062200 | -1.37771500 | 1.71727600  | C                                                        | -2.68100200 | -0.38927300 | 0.22965200  |
| H | -4.03564800 | -0.37961900 | 2.15061800  | H                                                        | -3.10077000 | -0.24457400 | 1.23144700  |
| H | -5.00357300 | -1.35918500 | 1.04496000  | H                                                        | -3.41528900 | -0.92369900 | -0.37980100 |
| H | -4.37325200 | -2.07104000 | 2.53403100  | H                                                        | -2.58455900 | 1.82587500  | 0.12941300  |
| C | -1.98401900 | -2.24310100 | -2.79701900 | H                                                        | -2.54400200 | 1.03397600  | -1.46128300 |
| H | -2.46106500 | -2.86952100 | -3.56004600 | C                                                        | 2.04041300  | -0.14936400 | -0.03510900 |
| H | -1.52984700 | -1.38667800 | -3.30480300 | O                                                        | 2.98166000  | -0.68297700 | -0.55613000 |

|                                              |              |             |             |                                              |             |             |             |
|----------------------------------------------|--------------|-------------|-------------|----------------------------------------------|-------------|-------------|-------------|
| C                                            | 2.06489800   | 1.21881700  | 0.60335100  | H                                            | 1.44826300  | 2.28412700  | 3.53048500  |
| H                                            | 1.36063900   | 1.88601300  | 0.10066900  | H                                            | 0.17783900  | 1.11990600  | 3.13362700  |
| H                                            | 1.75984500   | 1.14899800  | 1.65241000  | H                                            | 1.82284400  | 0.87626800  | 2.52084800  |
| H                                            | 3.07597400   | 1.61904000  | 0.53864100  | C                                            | -3.63789700 | -0.44932300 | 2.43977600  |
| <b>3A</b>                                    |              |             |             | H                                            | -3.07420900 | 0.46906700  | 2.62738200  |
| Sum of electronic and thermal Free Energies= | -3626.504054 |             |             | H                                            | -4.55848900 | -0.16660500 | 1.92154000  |
| Cu                                           | 0.13390800   | -0.88771600 | -0.11326000 | H                                            | -3.91780800 | -0.87607200 | 3.41000000  |
| C                                            | 1.06913000   | 2.34678200  | -1.25262900 | C                                            | -2.60651700 | -2.99311300 | -1.85417300 |
| C                                            | 0.72933600   | 2.44936300  | 1.48659100  | H                                            | -3.31961600 | -3.58624900 | -2.43864200 |
| C                                            | 1.94132600   | 3.20660000  | 0.89850800  | H                                            | -1.87914000 | -2.55601200 | -2.54433600 |
| C                                            | 1.60575900   | 3.60638200  | -0.54392000 | H                                            | -2.05591000 | -3.67497400 | -1.19818400 |
| H                                            | 1.92283700   | 1.67765500  | -1.42310900 | Si                                           | 1.99003100  | -2.23235700 | -0.32271900 |
| H                                            | -0.05776000  | 3.17517400  | 1.72709700  | C                                            | 3.56791200  | -1.16773000 | -0.05378800 |
| H                                            | 2.19285600   | 4.07298000  | 1.52169500  | C                                            | 4.18325800  | -0.47566300 | -1.11617400 |
| H                                            | 2.81717100   | 2.54554500  | 0.89853800  | C                                            | 4.10516400  | -0.95225300 | 1.23100100  |
| H                                            | 0.84396700   | 4.39808700  | -0.55112800 | C                                            | 5.26450400  | 0.38571900  | -0.91226900 |
| H                                            | 2.48124700   | 4.00570200  | -1.07020300 | H                                            | 3.81344600  | -0.61693100 | -2.13005700 |
| P                                            | 0.08483900   | 1.39894000  | 0.05480600  | C                                            | 5.18621300  | -0.09382600 | 1.44777600  |
| C                                            | -1.69623300  | 1.89918100  | -0.14662300 | H                                            | 3.67261400  | -1.47122700 | 2.08439800  |
| C                                            | -2.67465400  | 0.87760400  | -0.23312800 | C                                            | 5.77082300  | 0.58356500  | 0.37472400  |
| C                                            | -2.10443900  | 3.24037000  | -0.24785900 | H                                            | 5.71814400  | 0.89726100  | -1.75851400 |
| C                                            | -4.01399100  | 1.23666900  | -0.46109200 | H                                            | 5.57802300  | 0.04202900  | 2.45349500  |
| C                                            | -3.43881000  | 3.57927600  | -0.46203200 | H                                            | 6.61385700  | 1.24987900  | 0.53817000  |
| H                                            | -1.36729800  | 4.03320100  | -0.16461000 | C                                            | 2.13998100  | -3.69294300 | 0.91520000  |
| C                                            | -4.39698100  | 2.57090900  | -0.57973100 | H                                            | 2.05986500  | -3.36911000 | 1.95918800  |
| H                                            | -4.77379800  | 0.46516400  | -0.54095800 | H                                            | 1.32557900  | -4.40620500 | 0.73915700  |
| H                                            | -3.72844400  | 4.62316000  | -0.54277400 | H                                            | 3.08736100  | -4.23556500 | 0.80627000  |
| H                                            | -5.43914400  | 2.82276300  | -0.75457600 | C                                            | 2.21423700  | -3.06180600 | -2.04033800 |
| C                                            | -2.81247900  | -1.47020200 | 1.64923100  | H                                            | 1.39003700  | -3.76384200 | -2.21520100 |
| C                                            | -3.34695200  | -1.90828900 | -1.05644000 | H                                            | 2.19427300  | -2.33753600 | -2.86277600 |
| C                                            | -3.60480100  | -2.74750100 | 1.28184300  | H                                            | 3.15349600  | -3.62412800 | -2.11371300 |
| H                                            | -1.93689100  | -1.74016900 | 2.24914400  | <b>R2</b>                                    |             |             |             |
| C                                            | -4.35269500  | -2.49450900 | -0.03759400 | Sum of electronic and thermal Free Energies= | -311.90039  |             |             |
| H                                            | -3.84996400  | -1.24064500 | -1.76350800 | C                                            | -2.21059600 | 0.00012400  | -0.13058200 |
| H                                            | -2.90993600  | -3.58548900 | 1.15305100  | C                                            | -1.37856800 | 1.27065400  | -0.36247900 |
| H                                            | -4.28922000  | -3.02500800 | 2.09214200  | C                                            | -0.10659400 | 1.28057600  | 0.50721600  |
| H                                            | -4.81142200  | -3.41347400 | -0.42172600 | C                                            | -0.10676800 | -1.28066900 | 0.50715100  |
| H                                            | -5.16977700  | -1.78333400 | 0.13594700  | C                                            | -1.37877100 | -1.27053800 | -0.36250300 |
| P                                            | -2.13130900  | -0.89201500 | -0.02803700 | H                                            | 0.51271400  | 2.15408600  | 0.28426900  |
| C                                            | 0.37502600   | 2.58612300  | -2.59374500 | H                                            | -1.08763100 | 1.32674800  | -1.41987000 |
| H                                            | 0.04561600   | 1.64669700  | -3.04951700 | H                                            | -1.97905300 | 2.16367700  | -0.15120200 |
| H                                            | -0.50076600  | 3.23356200  | -2.49276200 | H                                            | -2.59031200 | 0.00014500  | 0.90151700  |
| H                                            | 1.06793700   | 3.06674600  | -3.29382300 | H                                            | -3.09049900 | 0.00020000  | -0.78492500 |
| C                                            | 1.06138100   | 1.63203400  | 2.73838700  | H                                            | 0.51241500  | -2.15425000 | 0.28413500  |

|                                                           |             |             |             |    |             |             |             |
|-----------------------------------------------------------|-------------|-------------|-------------|----|-------------|-------------|-------------|
| H                                                         | -0.40269800 | -1.35561800 | 1.56484800  | H  | -3.94582900 | -0.41630300 | 2.07934400  |
| H                                                         | -1.08788800 | -1.32668800 | -1.41990500 | H  | -4.07708800 | -2.18063500 | 2.10128100  |
| H                                                         | -1.97938800 | -2.16346300 | -0.15119000 | H  | -3.83813900 | -1.28909800 | 3.61209900  |
| H                                                         | -0.40254500 | 1.35549900  | 1.56490900  | C  | 0.21760200  | -3.88250300 | -0.10079000 |
| C                                                         | 0.68979200  | -0.00009900 | 0.31513000  | H  | 0.54079600  | -4.89611500 | 0.16370800  |
| C                                                         | 1.95258500  | -0.00017400 | -0.03447800 | H  | -0.17861000 | -3.91798900 | -1.12122900 |
| C                                                         | 3.21553300  | -0.00000800 | -0.37634800 | H  | 1.10191200  | -3.23792100 | -0.11560800 |
| H                                                         | 3.52590600  | 0.00006300  | -1.41958900 | C  | -2.20922400 | 1.74047700  | -2.93909600 |
| H                                                         | 4.00930400  | 0.00041000  | 0.36836300  | H  | -1.79893400 | 0.73408200  | -3.05613900 |
| <b>TS2A</b>                                               |             |             |             | H  | -3.25509900 | 1.69927200  | -3.25566700 |
| Sum of electronic and thermal Free Energies= -3938.361450 |             |             |             | H  | -1.68002600 | 2.40263500  | -3.63517600 |
| C                                                         | -2.04266100 | -1.44434300 | 2.41766400  | C  | -4.32113000 | 2.90198200  | 1.53866900  |
| C                                                         | -0.82597200 | -3.37206400 | 0.89340900  | H  | -5.21053900 | 3.53005100  | 1.66943600  |
| C                                                         | -0.36190000 | -3.34368200 | 2.36206400  | H  | -4.33414900 | 2.13345800  | 2.31765100  |
| C                                                         | -1.49246900 | -2.69058400 | 3.17127200  | H  | -3.43956000 | 3.52691600  | 1.71703300  |
| H                                                         | -1.58297500 | -0.53511400 | 2.81688400  | Cu | 0.38515800  | -0.13961800 | 0.33455800  |
| H                                                         | -1.71919100 | -4.00965700 | 0.84695400  | C  | 3.80213200  | -1.31509300 | -0.00735900 |
| H                                                         | -0.13689900 | -4.35457100 | 2.72215900  | C  | 4.52469100  | -2.66734300 | 0.14419200  |
| H                                                         | 0.56294600  | -2.75846100 | 2.44929900  | C  | 4.21279500  | -1.40360900 | -2.53700200 |
| H                                                         | -2.30622000 | -3.41838200 | 3.28497500  | C  | 5.56434300  | -2.87936000 | -0.96684500 |
| H                                                         | -1.16702600 | -2.41975100 | 4.18115900  | C  | 4.93056700  | -2.75562400 | -2.36059600 |
| P                                                         | -1.33727700 | -1.58336200 | 0.65901200  | H  | 4.51789000  | -0.49878900 | 0.15973400  |
| C                                                         | -2.75668300 | -1.58506300 | -0.53102100 | H  | 3.78676300  | -3.48066800 | 0.10902900  |
| C                                                         | -3.38310100 | -0.35838100 | -0.87627300 | H  | 6.36104600  | -2.12899800 | -0.86369600 |
| C                                                         | -3.20113600 | -2.77005500 | -1.14057400 | H  | 4.95968600  | -0.59642300 | -2.51617500 |
| C                                                         | -4.46520800 | -0.38236600 | -1.76986900 | H  | 5.69330400  | -2.87122100 | -3.13999600 |
| C                                                         | -4.26053500 | -2.76593200 | -2.04791400 | H  | 3.01113000  | -1.19204900 | 0.73727900  |
| H                                                         | -2.72708700 | -3.71644200 | -0.90457600 | H  | 5.00271200  | -2.71825600 | 1.12956700  |
| C                                                         | -4.90632200 | -1.56965200 | -2.35399800 | H  | 3.70625000  | -1.35006500 | -3.50493500 |
| H                                                         | -4.97464000 | 0.54293200  | -2.02091300 | H  | 6.04281700  | -3.85978400 | -0.85583200 |
| H                                                         | -4.58610100 | -3.69772800 | -2.50183000 | H  | 4.20512500  | -3.56777000 | -2.50468700 |
| H                                                         | -5.74259300 | -1.55714400 | -3.04720700 | C  | 3.22788600  | -1.15833800 | -1.40275100 |
| C                                                         | -2.05269600 | 2.26771300  | -1.50765000 | C  | 1.98043700  | -0.84546900 | -1.64946700 |
| C                                                         | -4.30303000 | 2.27941400  | 0.13265400  | C  | 0.74228000  | -0.56013400 | -2.01093000 |
| C                                                         | -2.76059600 | 3.62502600  | -1.29493100 | H  | 0.02369200  | -1.34062900 | -2.25138900 |
| H                                                         | -0.98355100 | 2.37482100  | -1.29469100 | H  | 0.45429400  | 0.46197600  | -2.25192500 |
| C                                                         | -4.23925500 | 3.34561000  | -0.98490300 | Si | 1.49211500  | 1.43172900  | 1.60208100  |
| H                                                         | -5.19165900 | 1.64965900  | 0.02062000  | C  | 2.24523800  | 0.72596300  | 3.22386900  |
| H                                                         | -2.30251200 | 4.15333300  | -0.44995200 | H  | 1.44142900  | 0.32335500  | 3.85269800  |
| H                                                         | -2.64020000 | 4.27048700  | -2.17346300 | H  | 2.95363500  | -0.09206200 | 3.04691400  |
| H                                                         | -4.76835100 | 4.26001500  | -0.68920200 | H  | 2.76531800  | 1.49380200  | 3.81091000  |
| H                                                         | -4.73756600 | 2.97396400  | -1.88852500 | C  | 0.34939100  | 2.84409200  | 2.23303200  |
| P                                                         | -2.74420100 | 1.19804500  | -0.08062200 | H  | -0.06857600 | 3.43255400  | 1.40789700  |
| C                                                         | -3.56309700 | -1.32440700 | 2.55098700  | H  | -0.49764600 | 2.42466200  | 2.78897900  |



|                                              |              |             |             |    |             |             |             |
|----------------------------------------------|--------------|-------------|-------------|----|-------------|-------------|-------------|
| H                                            | 0.88161600   | 3.53695300  | 2.89666700  | H  | -3.87949600 | 3.77396000  | 1.73776400  |
| C                                            | 2.93291200   | 2.35447900  | 0.72757500  | P  | -2.17352900 | 1.13340800  | 1.00527600  |
| C                                            | 4.28116100   | 2.22672300  | 1.11191100  | C  | -3.56428800 | -2.36408400 | 1.47813100  |
| C                                            | 2.66992000   | 3.19561000  | -0.37149400 | H  | -3.65332800 | -1.34425300 | 1.85968000  |
| C                                            | 5.30892600   | 2.89285900  | 0.43677800  | H  | -4.35126100 | -2.51291000 | 0.73154700  |
| H                                            | 4.53831400   | 1.60146100  | 1.96380200  | H  | -3.76034400 | -3.04822600 | 2.31245000  |
| C                                            | 3.68488700   | 3.87165700  | -1.04946400 | C  | -0.73065400 | -2.89474100 | -3.00478300 |
| H                                            | 1.64120700   | 3.32758100  | -0.70540400 | H  | -0.72591000 | -3.81425300 | -3.60139200 |
| C                                            | 5.01488300   | 3.71944400  | -0.64845900 | H  | -1.09827100 | -2.08539200 | -3.64352400 |
| H                                            | 6.33945800   | 2.77231800  | 0.76380400  | H  | 0.30685100  | -2.66621600 | -2.73882300 |
| H                                            | 3.44166000   | 4.51692700  | -1.89073900 | C  | -2.09399000 | 3.61057900  | -0.63752300 |
| H                                            | 5.81051500   | 4.24100200  | -1.17423800 | H  | -2.04636300 | 3.01646200  | -1.55352100 |
| <b>4A</b>                                    |              |             |             | H  | -3.13847200 | 3.89889300  | -0.48913100 |
| Sum of electronic and thermal Free Energies= | -3938.370517 |             |             | H  | -1.52189000 | 4.53005500  | -0.81038200 |
| C                                            | -2.17532400  | -2.64625100 | 0.90039200  | C  | -2.91308600 | 1.14411200  | 3.74472000  |
| C                                            | -1.59754100  | -3.07177100 | -1.75720000 | H  | -3.56295500 | 1.51201500  | 4.54774300  |
| C                                            | -1.13802600  | -4.19633700 | -0.81017500 | H  | -2.99674600 | 0.05339600  | 3.71784500  |
| C                                            | -2.02771500  | -4.12300300 | 0.43796900  | H  | -1.87873300 | 1.38221600  | 4.01496900  |
| H                                            | -1.42619100  | -2.42307500 | 1.66442600  | Cu | 0.37016300  | -0.44147800 | -0.43096900 |
| H                                            | -2.62602300  | -3.30540600 | -2.06026100 | C  | 3.02410500  | 2.14126500  | 0.05902900  |
| H                                            | -1.21054300  | -5.17278400 | -1.30350700 | C  | 4.50021500  | 2.22887400  | -0.37851200 |
| H                                            | -0.08601600  | -4.04931200 | -0.53938900 | C  | 2.31706200  | 3.15467100  | -2.16023600 |
| H                                            | -3.02276400  | -4.51310200 | 0.18684500  | C  | 4.72809000  | 3.36636100  | -1.38384900 |
| H                                            | -1.63803300  | -4.74439300 | 1.25112300  | C  | 3.79361100  | 3.23468500  | -2.59526300 |
| P                                            | -1.63092000  | -1.60222700 | -0.59014000 | H  | 2.77161600  | 3.05512400  | 0.62127900  |
| C                                            | -3.08815600  | -0.55285000 | -1.06463300 | H  | 4.78980200  | 1.27214200  | -0.82957400 |
| C                                            | -3.35143600  | 0.64404000  | -0.34770200 | H  | 4.54440600  | 4.33255500  | -0.89060400 |
| C                                            | -3.93720200  | -0.91000600 | -2.12393900 | H  | 2.03711600  | 4.11679700  | -1.70187100 |
| C                                            | -4.49506700  | 1.38904100  | -0.67622600 | H  | 3.93192200  | 4.07862000  | -3.28278000 |
| C                                            | -5.04889900  | -0.13540500 | -2.45551900 | H  | 2.87684100  | 1.29582100  | 0.73000800  |
| H                                            | -3.74265200  | -1.80611100 | -2.70255400 | H  | 5.13672400  | 2.36254400  | 0.50356000  |
| C                                            | -5.34125200  | 1.00993400  | -1.71762800 | H  | 1.66229300  | 3.00473500  | -3.02331300 |
| H                                            | -4.72891500  | 2.28523400  | -0.11036400 | H  | 5.77438500  | 3.37940400  | -1.71277900 |
| H                                            | -5.68963500  | -0.43653100 | -3.27947800 | H  | 4.04899800  | 2.32453100  | -3.15438100 |
| H                                            | -6.21592800  | 1.60907600  | -1.95411600 | C  | 2.10058200  | 2.04922100  | -1.13285600 |
| C                                            | -1.50710800  | 2.87095600  | 0.57153600  | C  | 1.18310300  | 1.11490900  | -1.35522300 |
| C                                            | -3.30710200  | 1.77794500  | 2.40070800  | C  | 0.11884500  | 0.68677000  | -2.11830400 |
| C                                            | -1.72511900  | 3.64275300  | 1.89274800  | H  | 0.27509700  | 0.03412600  | -2.97796300 |
| H                                            | -0.43750900  | 2.72707000  | 0.38950900  | H  | -0.82650600 | 1.22673500  | -2.12090900 |
| C                                            | -3.13774700  | 3.31569900  | 2.40286600  | Si | 1.73791800  | -1.25458400 | 1.29879000  |
| H                                            | -4.34161400  | 1.50092000  | 2.17252100  | C  | 1.46448700  | -3.09194700 | 1.81429800  |
| H                                            | -0.98334700  | 3.32633600  | 2.63649300  | H  | 0.44743500  | -3.29771300 | 2.16535300  |
| H                                            | -1.58246600  | 4.71989700  | 1.74340900  | H  | 1.67721700  | -3.77539300 | 0.98406700  |
| H                                            | -3.31344900  | 3.73035800  | 3.40299600  | H  | 2.15000000  | -3.35676400 | 2.62898400  |

|                                              |              |             |             |    |             |             |             |
|----------------------------------------------|--------------|-------------|-------------|----|-------------|-------------|-------------|
| C                                            | 1.51739200   | -0.29169800 | 2.94212100  | H  | 0.45166700  | 4.16517800  | 0.37415300  |
| H                                            | 1.76635000   | 0.77054100  | 2.84239300  | H  | -0.74083000 | 5.23224700  | -0.35232600 |
| H                                            | 0.46745700   | -0.34778100 | 3.25269300  | H  | -1.04832400 | 4.83201900  | 2.20341000  |
| H                                            | 2.12300900   | -0.70593400 | 3.75811700  | H  | -2.46736000 | 4.47356300  | 1.23072800  |
| C                                            | 3.62158300   | -1.28650800 | 0.91897800  | P  | -1.39069600 | 1.64165200  | 0.32654000  |
| C                                            | 4.60048100   | -0.86737400 | 1.83918700  | C  | -3.07047300 | -2.07500700 | 2.43125300  |
| C                                            | 4.08603000   | -1.80960800 | -0.30315300 | H  | -2.38877000 | -1.31228900 | 2.82174700  |
| C                                            | 5.96663900   | -0.96348900 | 1.55785900  | H  | -4.05106000 | -1.60943700 | 2.29480900  |
| H                                            | 4.29525000   | -0.45642100 | 2.79867500  | H  | -3.17002300 | -2.85270500 | 3.19702300  |
| C                                            | 5.44737800   | -1.91733100 | -0.59356500 | C  | -1.90928200 | -2.66220400 | -2.87850500 |
| H                                            | 3.36557400   | -2.14147800 | -1.04979700 | H  | -2.35921900 | -3.33268600 | -3.62049900 |
| C                                            | 6.39603500   | -1.49109900 | 0.33932600  | H  | -1.80337600 | -1.67313700 | -3.33097600 |
| H                                            | 6.69594000   | -0.62838200 | 2.29185400  | H  | -0.90521800 | -3.03401700 | -2.65587400 |
| H                                            | 5.76941100   | -2.33009500 | -1.54685200 | C  | -2.12048500 | 3.49227200  | -1.82402500 |
| H                                            | 7.45727300   | -1.56819400 | 0.11749500  | H  | -2.45102800 | 2.62869700  | -2.40876600 |
| <b>TS3A</b>                                  |              |             |             | H  | -3.00247500 | 3.92492900  | -1.34419200 |
| Sum of electronic and thermal Free Energies= | -3938.345626 |             |             | H  | -1.72733800 | 4.23834700  | -2.52437200 |
| C                                            | -2.54747500  | -2.67947200 | 1.12800100  | C  | -0.22327000 | 2.36949100  | 2.82208300  |
| C                                            | -2.77959900  | -2.61664100 | -1.62132700 | H  | -0.26379500 | 2.98180900  | 3.73081600  |
| C                                            | -2.94935600  | -3.99176700 | -0.93505300 | H  | -0.22341800 | 1.31769900  | 3.12329900  |
| C                                            | -3.43628800  | -3.77113000 | 0.50346300  | H  | 0.73209400  | 2.56605600  | 2.32717200  |
| H                                            | -1.56418100  | -3.12370000 | 1.32597500  | Cu | -0.25066700 | -0.28697000 | -0.35883800 |
| H                                            | -3.76976100  | -2.24546000 | -1.90813500 | C  | 2.80910400  | 1.69327300  | 0.40715600  |
| H                                            | -3.63206600  | -4.62850700 | -1.50992300 | C  | 4.31520700  | 1.99322700  | 0.54290700  |
| H                                            | -1.97975700  | -4.50628300 | -0.91622700 | C  | 3.03801500  | 1.84762300  | -2.13666000 |
| H                                            | -4.48485100  | -3.44651400 | 0.50575500  | C  | 4.83933500  | 2.82010500  | -0.63770900 |
| H                                            | -3.39406800  | -4.69526900 | 1.09284200  | C  | 4.54629800  | 2.10520100  | -1.96250100 |
| P                                            | -2.16844600  | -1.44922800 | -0.25849300 | H  | 2.26275900  | 2.63712200  | 0.58399800  |
| C                                            | -3.51451900  | -0.17000200 | -0.13031000 | H  | 4.86590500  | 1.04796800  | 0.59021500  |
| C                                            | -3.18035800  | 1.17856000  | 0.14190900  | H  | 4.35684500  | 3.80955000  | -0.64262000 |
| C                                            | -4.87038100  | -0.52289000 | -0.24652900 | H  | 2.54565100  | 2.82607000  | -2.28569600 |
| C                                            | -4.21981000  | 2.10776300  | 0.32107700  | H  | 4.92140500  | 2.69284200  | -2.81031400 |
| C                                            | -5.88604100  | 0.41789300  | -0.08859000 | H  | 2.48149500  | 1.00984500  | 1.19946600  |
| H                                            | -5.14704100  | -1.55086200 | -0.45412900 | H  | 4.49986900  | 2.51627300  | 1.49007700  |
| C                                            | -5.55871300  | 1.74083500  | 0.20401100  | H  | 2.84381300  | 1.26852500  | -3.04468900 |
| H                                            | -3.98247600  | 3.13828200  | 0.56069000  | H  | 5.91615800  | 2.99906900  | -0.52744200 |
| H                                            | -6.92495500  | 0.11527100  | -0.18347700 | H  | 5.07979200  | 1.14615900  | -1.97573700 |
| H                                            | -6.33923700  | 2.48365400  | 0.34187700  | C  | 2.40708600  | 1.14765800  | -0.94228500 |
| C                                            | -1.02805700  | 3.10876600  | -0.81939300 | C  | 1.49242700  | 0.16784200  | -1.15177300 |
| C                                            | -1.41679500  | 2.68889200  | 1.91166400  | C  | 0.63961800  | -0.11561000 | -2.24685100 |
| C                                            | -0.61357700  | 4.25776000  | 0.13399300  | H  | 0.63147000  | -1.10402800 | -2.70044700 |
| H                                            | -0.15306900  | 2.78069300  | -1.38964200 | H  | 0.38284900  | 0.69727000  | -2.92482600 |
| C                                            | -1.43585600  | 4.15825800  | 1.42912800  | Si | 1.61590200  | -1.59280300 | 0.54390100  |
| H                                            | -2.33891100  | 2.44955800  | 2.45113500  | C  | 1.25380000  | -3.25786900 | -0.33322200 |

|                                              |              |             |             |    |             |             |             |
|----------------------------------------------|--------------|-------------|-------------|----|-------------|-------------|-------------|
| H                                            | 0.20479200   | -3.55862300 | -0.24916500 | H  | 1.70889400  | 2.55303800  | 1.88063600  |
| H                                            | 1.49492000   | -3.19689000 | -1.39996900 | C  | 1.94305600  | 4.10481000  | -1.14578400 |
| H                                            | 1.86992100   | -4.05597300 | 0.09749300  | H  | 2.31149500  | 2.46226300  | -2.54477500 |
| C                                            | 1.11760800   | -1.80996900 | 2.38957800  | H  | 0.52363800  | 4.03502600  | 0.48638700  |
| H                                            | 1.32717800   | -0.90316800 | 2.96749900  | H  | 1.94026400  | 5.01604100  | 0.85241500  |
| H                                            | 0.04815100   | -2.01544600 | 2.49203400  | H  | 1.37989300  | 4.88048200  | -1.67852400 |
| H                                            | 1.66575600   | -2.63876200 | 2.85599100  | H  | 3.00660800  | 4.33751100  | -1.28194100 |
| C                                            | 3.52538800   | -1.57866000 | 0.58720300  | P  | 1.96520600  | 1.49611600  | -0.29733600 |
| C                                            | 4.25517800   | -1.51309200 | 1.78703800  | C  | 2.63420800  | -3.07359100 | -2.03878400 |
| C                                            | 4.26530200   | -1.73297700 | -0.60160800 | H  | 2.00193200  | -2.32580700 | -2.52812000 |
| C                                            | 5.65111400   | -1.59566600 | 1.80507700  | H  | 3.67699300  | -2.80526400 | -2.23057700 |
| H                                            | 3.73307300   | -1.39348100 | 2.73244500  | H  | 2.44002300  | -4.03733900 | -2.52324100 |
| C                                            | 5.65767000   | -1.82646800 | -0.59413100 | C  | 2.80826700  | -1.87416300 | 3.28992700  |
| H                                            | 3.74227000   | -1.77816700 | -1.55342600 | H  | 3.25877400  | -2.43926200 | 4.11450000  |
| C                                            | 6.35788600   | -1.75511300 | 0.61307500  | H  | 3.08326400  | -0.82252800 | 3.42072500  |
| H                                            | 6.18437200   | -1.53751800 | 2.75082900  | H  | 1.71965200  | -1.94631200 | 3.38154900  |
| H                                            | 6.19751600   | -1.95256800 | -1.52945600 | C  | 3.72990400  | 3.09715600  | 1.42116100  |
| H                                            | 7.44251800   | -1.82347400 | 0.62297800  | H  | 4.19957400  | 2.18315900  | 1.79627600  |
| <b>5A</b>                                    |              |             |             | H  | 4.35060700  | 3.47039000  | 0.60189200  |
| Sum of electronic and thermal Free Energies= | -3938.406687 |             |             | H  | 3.75719500  | 3.84267300  | 2.22456000  |
| C                                            | 2.33406700   | -3.16874800 | -0.54252300 | C  | 0.18743600  | 2.55654400  | -2.21753800 |
| C                                            | 3.28649400   | -2.41820300 | 1.94123200  | H  | -0.02141800 | 3.29767300  | -2.99804700 |
| C                                            | 2.98718900   | -3.91768700 | 1.72714300  | H  | 0.01131100  | 1.56316900  | -2.64061400 |
| C                                            | 3.14439100   | -4.22678400 | 0.23292200  | H  | -0.54040600 | 2.69215700  | -1.41205500 |
| H                                            | 1.27179300   | -3.41832400 | -0.42636900 | Cu | 0.70845600  | -0.19646300 | 0.64468600  |
| H                                            | 4.36930200   | -2.26350400 | 1.85771400  | C  | -3.80011800 | 1.82026800  | -0.61389300 |
| H                                            | 3.64126500   | -4.53700500 | 2.35207700  | C  | -5.01692100 | 2.49138400  | 0.05856600  |
| H                                            | 1.95528300   | -4.12851200 | 2.03807000  | C  | -2.30510700 | 2.65823700  | 1.21617500  |
| H                                            | 4.20375400   | -4.17243000 | -0.05203600 | C  | -4.59945400 | 3.70511300  | 0.89971300  |
| H                                            | 2.80299300   | -5.23927500 | -0.01457400 | C  | -3.50788200 | 3.33077600  | 1.91156800  |
| P                                            | 2.48753300   | -1.56590500 | 0.45701500  | H  | -3.38728200 | 2.53181900  | -1.35107900 |
| C                                            | 3.87164500   | -0.59226000 | -0.31621100 | H  | -5.51382000 | 1.75294100  | 0.70104300  |
| C                                            | 3.62680200   | 0.75234600  | -0.68786500 | H  | -4.21540900 | 4.49144200  | 0.23235200  |
| C                                            | 5.13376600   | -1.15275800 | -0.57915000 | H  | -1.84465100 | 3.41057600  | 0.55022600  |
| C                                            | 4.64149800   | 1.46759600  | -1.34739200 | H  | -3.17700100 | 4.22123700  | 2.46253300  |
| C                                            | 6.13104600   | -0.42540700 | -1.22501600 | H  | -4.14302300 | 0.95348600  | -1.18425300 |
| H                                            | 5.34095600   | -2.17705200 | -0.28423500 | H  | -5.74882000 | 2.79058500  | -0.70286400 |
| C                                            | 5.87903200   | 0.88934200  | -1.62033900 | H  | -1.54571900 | 2.39656300  | 1.95608200  |
| H                                            | 4.46543200   | 2.49457800  | -1.65219000 | H  | -5.46959500 | 4.13272400  | 1.41407000  |
| H                                            | 7.09541000   | -0.88364300 | -1.42523100 | H  | -3.92186700 | 2.63468800  | 2.65366600  |
| H                                            | 6.64535100   | 1.46406600  | -2.13282200 | C  | -2.72219000 | 1.45345500  | 0.39152400  |
| C                                            | 2.27750000   | 2.85702800  | 0.99517500  | C  | -2.18401300 | 0.20976500  | 0.54297300  |
| C                                            | 1.63359800   | 2.70173300  | -1.71892800 | C  | -1.07809200 | -0.14298900 | 1.49499300  |
| C                                            | 1.60985100   | 4.09658100  | 0.35460600  | H  | -1.27233400 | -1.12312400 | 1.94757300  |

|                                              |              |             |             |    |             |             |             |
|----------------------------------------------|--------------|-------------|-------------|----|-------------|-------------|-------------|
| H                                            | -1.03251000  | 0.56202100  | 2.33619700  | H  | 4.52126000  | -3.00925100 | -0.80375800 |
| Si                                           | -2.72673400  | -1.23778600 | -0.56314400 | C  | 6.31516100  | -0.13685000 | -0.76767900 |
| C                                            | -1.90494200  | -2.85261800 | 0.01046900  | H  | 5.56129800  | 1.78927100  | -0.22939900 |
| H                                            | -0.82412400  | -2.71617300 | 0.11563600  | H  | 6.79746900  | -2.18712900 | -1.24272500 |
| H                                            | -2.29226100  | -3.18084700 | 0.98037700  | H  | 7.31707300  | 0.23589600  | -0.96089800 |
| H                                            | -2.09141900  | -3.65520400 | -0.71205600 | C  | 3.07007100  | 2.00481900  | 2.19656900  |
| C                                            | -2.19465000  | -0.97925000 | -2.37165900 | C  | 3.10649100  | 3.09820300  | -0.37024700 |
| H                                            | -2.64602400  | -0.08708400 | -2.81610700 | C  | 3.07337300  | 3.54819500  | 2.08448500  |
| H                                            | -1.10596200  | -0.85527800 | -2.41619000 | H  | 2.22562500  | 1.68529900  | 2.81689800  |
| H                                            | -2.44913800  | -1.83809000 | -3.00350400 | C  | 3.74802800  | 3.93760600  | 0.75898100  |
| C                                            | -4.60391000  | -1.54467600 | -0.49063200 | H  | 3.82575900  | 2.90078700  | -1.17099300 |
| C                                            | -5.32185700  | -2.06834100 | -1.58120000 | H  | 2.04092000  | 3.91755000  | 2.08860800  |
| C                                            | -5.31803400  | -1.31546100 | 0.70114000  | H  | 3.57490200  | 4.00055500  | 2.94826400  |
| C                                            | -6.68672400  | -2.35211200 | -1.49014500 | H  | 3.64803700  | 5.01100400  | 0.55734500  |
| H                                            | -4.81302400  | -2.25568900 | -2.52411700 | H  | 4.82297900  | 3.72802900  | 0.82214100  |
| C                                            | -6.68120500  | -1.59964400 | 0.80210000  | P  | 2.64506300  | 1.44498900  | 0.42982800  |
| H                                            | -4.79894900  | -0.89325900 | 1.55831600  | C  | 2.08388900  | -2.46076100 | -2.79813900 |
| C                                            | -7.37024100  | -2.11967900 | -0.29573300 | H  | 1.82729800  | -1.43582300 | -3.07949200 |
| H                                            | -7.21623800  | -2.75230800 | -2.35123400 | H  | 3.17256500  | -2.56021400 | -2.82461800 |
| H                                            | -7.20699500  | -1.41148800 | 1.73485800  | H  | 1.66771200  | -3.13088300 | -3.55906700 |
| H                                            | -8.43218300  | -2.33881900 | -0.22161400 | C  | 1.81747000  | -2.79160900 | 2.66586400  |
| <b>CO<sub>2</sub></b>                        |              |             |             | H  | 1.97495600  | -3.66684500 | 3.30715200  |
| Sum of electronic and thermal Free Energies= | -188.590066  |             |             | H  | 2.40933800  | -1.96855500 | 3.08019900  |
| C                                            | 0.00000000   | 0.00000000  | 0.00000000  | H  | 0.76246300  | -2.51022800 | 2.73423700  |
| O                                            | 0.00000000   | 0.00000000  | 1.16915600  | C  | 4.35308200  | 1.43672300  | 2.81382700  |
| O                                            | 0.00000000   | 0.00000000  | -1.16915600 | H  | 4.34847300  | 0.34262100  | 2.82144400  |
| <b>TS4A</b>                                  |              |             |             | H  | 5.25189400  | 1.75419600  | 2.27781800  |
| Sum of electronic and thermal Free Energies= | -4126.966724 |             |             | H  | 4.44543100  | 1.77875000  | 3.85138000  |
| C                                            | 1.50584500   | -2.81016800 | -1.42589900 | C  | 1.87228100  | 3.77055100  | -0.98800000 |
| C                                            | 2.22562500   | -3.10221000 | 1.22455500  | H  | 2.15767800  | 4.70841500  | -1.47887300 |
| C                                            | 1.47150200   | -4.28139500 | 0.57617700  | H  | 1.39701900  | 3.12367000  | -1.72998500 |
| C                                            | 1.76264400   | -4.24848700 | -0.93113000 | H  | 1.11799000  | 4.00755700  | -0.23049500 |
| H                                            | 0.41912700   | -2.66795900 | -1.48186400 | Cu | 0.72348900  | 0.19113000  | 0.35124000  |
| H                                            | 3.29747000   | -3.33566800 | 1.20919200  | Si | -3.02298800 | -1.25594300 | 0.31840500  |
| H                                            | 1.76778300   | -5.23184600 | 1.03556100  | C  | -2.94745600 | -2.39648700 | -1.19453500 |
| H                                            | 0.39269300   | -4.16804200 | 0.74624300  | H  | -1.91578400 | -2.73678900 | -1.34127700 |
| H                                            | 2.80936100   | -4.52755600 | -1.11357000 | H  | -3.56115400 | -3.29125700 | -1.03828200 |
| H                                            | 1.14558000   | -4.96676000 | -1.48424100 | H  | -3.25958800 | -1.91821400 | -2.12532800 |
| P                                            | 1.97032500   | -1.67239900 | 0.01429000  | C  | -2.24228700 | -2.22539700 | 1.75058200  |
| C                                            | 3.70732700   | -1.07804700 | -0.27840500 | H  | -1.17026100 | -2.37222300 | 1.58832800  |
| C                                            | 4.00598900   | 0.29364400  | -0.09960900 | H  | -2.37188900 | -1.72771900 | 2.71655100  |
| C                                            | 4.73368700   | -1.95213500 | -0.67729600 | H  | -2.71451200 | -3.21173300 | 1.82355900  |
| C                                            | 5.31485800   | 0.73965900  | -0.35445200 | C  | -4.82941900 | -0.94022300 | 0.81634800  |
| C                                            | 6.02478300   | -1.49280900 | -0.92520100 | C  | -5.91775900 | -1.49676900 | 0.12202800  |

|                                              |              |             |             |    |             |             |             |
|----------------------------------------------|--------------|-------------|-------------|----|-------------|-------------|-------------|
| C                                            | -5.11931300  | -0.14890800 | 1.94517100  | P  | 2.46981000  | -1.55208900 | -0.17801400 |
| C                                            | -7.23527400  | -1.27634000 | 0.53190000  | C  | 4.03202700  | -0.56543600 | -0.01082400 |
| H                                            | -5.74064500  | -2.11049400 | -0.75772600 | C  | 3.97176800  | 0.80568000  | 0.34236200  |
| C                                            | -6.43204500  | 0.07587200  | 2.36166700  | C  | 5.28874900  | -1.15050000 | -0.24614500 |
| H                                            | -4.30610600  | 0.30574600  | 2.50759200  | C  | 5.16890900  | 1.53941300  | 0.41637700  |
| C                                            | -7.49562200  | -0.48906200 | 1.65392900  | C  | 6.46473500  | -0.41013400 | -0.15817300 |
| H                                            | -8.05700800  | -1.71819400 | -0.02579000 | H  | 5.34893300  | -2.20153400 | -0.51003500 |
| H                                            | -6.62620300  | 0.69208900  | 3.23579100  | C  | 6.40354500  | 0.94510100  | 0.16903100  |
| H                                            | -8.51924500  | -0.31538300 | 1.97473300  | H  | 5.13834100  | 2.59409900  | 0.67097700  |
| C                                            | -3.71706200  | 1.13285400  | -1.79836600 | H  | 7.42185400  | -0.88613900 | -0.35062600 |
| C                                            | -4.74819800  | 2.16576500  | -1.28691400 | H  | 7.31267000  | 1.53593600  | 0.23336400  |
| C                                            | -1.84500800  | 2.65059100  | -1.10852900 | C  | 2.27475300  | 2.15009300  | 2.47252800  |
| C                                            | -4.18382200  | 3.59425200  | -1.29751200 | C  | 2.50489900  | 3.34879800  | -0.04400900 |
| C                                            | -2.84707400  | 3.67972800  | -0.54493600 | C  | 1.95191900  | 3.66175600  | 2.37224000  |
| H                                            | -3.52550900  | 1.31918500  | -2.86286000 | H  | 1.42327700  | 1.62168100  | 2.91510400  |
| H                                            | -5.04427100  | 1.89784100  | -0.26540800 | C  | 2.73688500  | 4.25325100  | 1.18944800  |
| H                                            | -4.02549900  | 3.91332400  | -2.33834700 | H  | 3.37403500  | 3.35739100  | -0.70908600 |
| H                                            | -1.66264000  | 2.90751300  | -2.16313000 | H  | 0.87796300  | 3.79654100  | 2.19805800  |
| H                                            | -2.43366100  | 4.69468900  | -0.61742500 | H  | 2.18546800  | 4.17100200  | 3.31447400  |
| H                                            | -4.15354300  | 0.13265100  | -1.74175700 | H  | 2.43069600  | 5.28518000  | 0.98113000  |
| H                                            | -5.65622600  | 2.11582300  | -1.90176900 | H  | 3.80446100  | 4.28589200  | 1.44014900  |
| H                                            | -0.88133300  | 2.71923200  | -0.60131400 | P  | 2.32585800  | 1.60453300  | 0.65524900  |
| H                                            | -4.91213300  | 4.29251000  | -0.86588700 | C  | 3.24236400  | -1.85517600 | -2.96971800 |
| H                                            | -3.01116500  | 3.47708700  | 0.52203900  | H  | 2.75322200  | -0.90790800 | -3.21444400 |
| C                                            | -2.41413200  | 1.23792100  | -1.02133100 | H  | 4.30237600  | -1.66357400 | -2.77724000 |
| C                                            | -2.10969800  | 0.40831900  | 0.06580300  | H  | 3.17331400  | -2.50032600 | -3.85281600 |
| C                                            | -1.09384600  | 0.72763600  | 1.05244800  | C  | 1.97580400  | -3.06393300 | 2.22591500  |
| H                                            | -1.20968700  | 0.17205900  | 1.98607800  | H  | 2.19762600  | -3.96843300 | 2.80414100  |
| H                                            | -1.01570500  | 1.79634000  | 1.27433800  | H  | 2.23065100  | -2.20187900 | 2.85151900  |
| C                                            | -0.90980600  | 0.24003100  | -2.47906300 | H  | 0.89796300  | -3.03750200 | 2.04131900  |
| O                                            | -1.59876000  | -0.12395300 | -3.37875100 | C  | 3.51255100  | 1.84378200  | 3.32370500  |
| O                                            | 0.16847200   | 0.41300100  | -1.97539700 | H  | 3.76182400  | 0.77865000  | 3.30845000  |
| <b>TS5A</b>                                  |              |             |             | H  | 4.39705300  | 2.39132500  | 2.98717100  |
| Sum of electronic and thermal Free Energies= | -4126.955902 |             |             | H  | 3.32156800  | 2.12835500  | 4.36481200  |
| C                                            | 2.54744200   | -2.53157400 | -1.78725700 | C  | 1.26284000  | 3.74156400  | -0.85954500 |
| C                                            | 2.76908700   | -3.05976100 | 0.91765200  | H  | 1.40379700  | 4.73347100  | -1.30410600 |
| C                                            | 2.48858500   | -4.26098900 | -0.01130600 | H  | 1.06916500  | 3.02250700  | -1.66024000 |
| C                                            | 3.06014300   | -3.93205700 | -1.39819500 | H  | 0.36571500  | 3.78437900  | -0.23183100 |
| H                                            | 1.48188100   | -2.61376800 | -2.03668100 | Cu | 0.83466700  | 0.02771400  | -0.11164800 |
| H                                            | 3.84018400   | -3.05312200 | 1.15574300  | Si | -3.12297000 | -1.42090700 | 0.15811300  |
| H                                            | 2.91503600   | -5.17929900 | 0.40911300  | C  | -3.58864300 | -2.76238600 | -1.09666700 |
| H                                            | 1.40477800   | -4.41767000 | -0.08967900 | H  | -2.75292800 | -2.87950900 | -1.79308300 |
| H                                            | 4.15830700   | -3.94371900 | -1.36438600 | H  | -3.76263700 | -3.72661400 | -0.60452900 |
| H                                            | 2.76067300   | -4.67357700 | -2.14821100 | H  | -4.48178300 | -2.51771000 | -1.67804200 |

|                                              |             |             |              |   |            |             |             |
|----------------------------------------------|-------------|-------------|--------------|---|------------|-------------|-------------|
| C                                            | -1.72260100 | -2.14679000 | 1.21568600   | H | 2.68881100 | -3.62580200 | -0.48223800 |
| H                                            | -0.84781400 | -2.34120200 | 0.58737600   | H | 4.96860500 | -1.69150000 | 2.18250200  |
| H                                            | -1.42703500 | -1.48606600 | 2.03772800   | H | 4.43724700 | -3.96140700 | 2.90556800  |
| H                                            | -2.04579500 | -3.09593700 | 1.65807900   | H | 2.83736100 | -3.88251500 | 2.16899600  |
| C                                            | -4.58109400 | -1.09786800 | 1.34169800   | H | 5.51218400 | -3.80599300 | 0.66047800  |
| C                                            | -5.44677800 | -2.13628600 | 1.73317700   | H | 4.30674300 | -5.08660300 | 0.55806900  |
| C                                            | -4.80266400 | 0.17197300  | 1.90677600   | P | 3.35123700 | -1.50731700 | 0.36009700  |
| C                                            | -6.48236600 | -1.92136700 | 2.64505500   | C | 4.66368900 | -0.33678800 | -0.23929300 |
| H                                            | -5.31674400 | -3.13294100 | 1.31694600   | C | 4.28133300 | 0.93978300  | -0.72507500 |
| C                                            | -5.83411200 | 0.39583300  | 2.82145400   | C | 6.02600500 | -0.68194300 | -0.23599900 |
| H                                            | -4.16394700 | 1.00197200  | 1.61415600   | C | 5.27514100 | 1.79924600  | -1.22299000 |
| C                                            | -6.67798200 | -0.65238600 | 3.19330200   | C | 6.99835600 | 0.18687200  | -0.72664500 |
| H                                            | -7.13813700 | -2.74199100 | 2.92510900   | H | 6.33389400 | -1.64732900 | 0.15455200  |
| H                                            | -5.98250700 | 1.38820300  | 3.24005500   | C | 6.61884900 | 1.43112000  | -1.23174000 |
| H                                            | -7.48414100 | -0.48116600 | 3.90182600   | H | 4.99738200 | 2.77609200  | -1.60675600 |
| C                                            | -4.78546100 | 0.48059400  | -1.84019700  | H | 8.04416300 | -0.10668500 | -0.71801200 |
| C                                            | -5.75175400 | 1.66850900  | -1.63966500  | H | 7.36630600 | 2.11561600  | -1.62269600 |
| C                                            | -2.91893200 | 2.07446800  | -2.34377700  | C | 2.31286700 | 2.80712000  | 0.60964500  |
| C                                            | -5.31900100 | 2.89901300  | -2.44738000  | C | 2.24523600 | 2.55946600  | -2.17378300 |
| C                                            | -3.86396700 | 3.27711800  | -2.14097800  | C | 1.60585200 | 3.93077500  | -0.18486700 |
| H                                            | -4.85401800 | 0.15207400  | -2.89009400  | H | 1.63284900 | 2.40230500  | 1.36581200  |
| H                                            | -5.77940000 | 1.92189100  | -0.57165400  | C | 2.21857300 | 3.99368100  | -1.59446500 |
| H                                            | -5.41381200 | 2.67865300  | -3.52068700  | H | 3.09144800 | 2.42726100  | -2.85559400 |
| H                                            | -2.94921600 | 1.79236900  | -3.40871400  | H | 0.53552000 | 3.70582600  | -0.26227100 |
| H                                            | -3.54482800 | 4.11438700  | -2.77461400  | H | 1.69056300 | 4.88977900  | 0.33972900  |
| H                                            | -5.12606100 | -0.35643300 | -1.22736600  | H | 1.65667100 | 4.67221000  | -2.24763500 |
| H                                            | -6.76958100 | 1.36746000  | -1.91738900  | H | 3.23925000 | 4.39123800  | -1.53108300 |
| H                                            | -1.88530000 | 2.36147500  | -2.14638400  | P | 2.48616700 | 1.42725300  | -0.68036000 |
| H                                            | -5.98764300 | 3.74475300  | -2.24288300  | C | 4.34235400 | -3.23844400 | -1.77826800 |
| H                                            | -3.78826800 | 3.62151800  | -1.10005300  | H | 3.75668500 | -2.66135300 | -2.50106500 |
| C                                            | -3.34870000 | 0.86367400  | -1.53451700  | H | 5.35686800 | -2.83068000 | -1.77201600 |
| C                                            | -2.54993500 | 0.19547100  | -0.65948400  | H | 4.39763700 | -4.26963100 | -2.14541000 |
| C                                            | -1.15784200 | 0.65575300  | -0.34357500  | C | 3.10103200 | -1.35761500 | 3.20945800  |
| H                                            | -0.98150000 | 0.50862900  | 0.74219200   | H | 3.39257700 | -1.77090800 | 4.18235600  |
| H                                            | -1.01284600 | 1.71521400  | -0.54991000  | H | 3.26351100 | -0.27580800 | 3.24806100  |
| C                                            | -0.15304400 | -0.27715000 | -1.98330000  | H | 2.02746800 | -1.51409000 | 3.06865900  |
| O                                            | 0.52539800  | 0.58038500  | -2.54203800  | C | 3.59815400 | 3.26617200  | 1.30564700  |
| O                                            | -0.61395600 | -1.38450700 | -2.18154600  | H | 4.11074700 | 2.43358300  | 1.79622800  |
| <b>6A</b>                                    |             |             |              | H | 4.30969100 | 3.72617900  | 0.61362500  |
| Sum of electronic and thermal Free Energies= |             |             | -4127.022258 | H | 3.35321200 | 4.00824800  | 2.07441900  |
| C                                            | 3.70040000  | -3.20900500 | -0.39053100  | C | 0.95383200 | 2.19064200  | -2.92045500 |
| C                                            | 3.92012300  | -2.00167600 | 2.08770100   | H | 0.80456900 | 2.85851600  | -3.77685100 |
| C                                            | 3.87659400  | -3.54382100 | 2.06114700   | H | 0.98903100 | 1.16269700  | -3.29354500 |
| C                                            | 4.43307900  | -4.00736400 | 0.70707400   | H | 0.07372000 | 2.26871200  | -2.27386600 |

|    |             |             |             |             |                                                           |             |             |
|----|-------------|-------------|-------------|-------------|-----------------------------------------------------------|-------------|-------------|
| Cu | 1.47783600  | -0.41784800 | -0.00983800 | <b>TS6A</b> |                                                           |             |             |
| Si | -3.87759000 | -1.14877100 | -0.91780200 |             | Sum of electronic and thermal Free Energies= -4126.877024 |             |             |
| C  | -3.29461300 | -0.32816200 | -2.52377600 | C           | 3.87274200                                                | -2.82391900 | -1.44580600 |
| H  | -2.19999600 | -0.29771700 | -2.51249500 | C           | 3.03111200                                                | -2.84261000 | 1.18781500  |
| H  | -3.60413700 | -0.89668500 | -3.40812400 | C           | 3.07748500                                                | -4.20094500 | 0.45808300  |
| H  | -3.66117300 | 0.69677700  | -2.63546700 | C           | 4.14941100                                                | -4.10897900 | -0.63783400 |
| C  | -3.24014100 | -2.93135400 | -0.92197000 | H           | 3.00057600                                                | -3.01931900 | -2.08348100 |
| H  | -2.14622200 | -2.93344600 | -0.89655300 | H           | 3.94202300                                                | -2.75080200 | 1.79295900  |
| H  | -3.61350200 | -3.50879100 | -0.06915100 | H           | 3.27736100                                                | -5.01343800 | 1.16635500  |
| H  | -3.57167300 | -3.44387200 | -1.83220400 | H           | 2.09949800                                                | -4.40734900 | 0.00287300  |
| C  | -5.78005600 | -1.22321500 | -0.87339700 | H           | 5.14641100                                                | -4.05702800 | -0.17880900 |
| C  | -6.54813300 | -1.25611100 | -2.05204600 | H           | 4.14768300                                                | -4.99035200 | -1.29056500 |
| C  | -6.47305900 | -1.31670300 | 0.34880800  | P           | 3.16847200                                                | -1.58087400 | -0.20581200 |
| C  | -7.93929200 | -1.37848100 | -2.01587300 | C           | 4.54077100                                                | -0.45315300 | 0.33679700  |
| H  | -6.05714600 | -1.18170800 | -3.01980300 | C           | 4.29453600                                                | 0.94149700  | 0.42299500  |
| C  | -7.86282300 | -1.44171300 | 0.39449700  | C           | 5.81742800                                                | -0.93996500 | 0.66510100  |
| H  | -5.91551000 | -1.28009400 | 1.28204700  | C           | 5.35004400                                                | 1.79119000  | 0.79480700  |
| C  | -8.60086300 | -1.47252400 | -0.79059600 | C           | 6.85051600                                                | -0.08187800 | 1.03563300  |
| H  | -8.50615200 | -1.39822600 | -2.94330200 | H           | 6.00961000                                                | -2.00809400 | 0.63065800  |
| H  | -8.37020800 | -1.51182800 | 1.35339200  | C           | 6.61690700                                                | 1.29259200  | 1.09142900  |
| H  | -9.68308100 | -1.56682700 | -0.75893300 | H           | 5.18256500                                                | 2.86166800  | 0.86133300  |
| C  | -4.52293000 | 1.89410900  | 0.11091900  | H           | 7.83056900                                                | -0.48308900 | 1.27743600  |
| C  | -5.59899000 | 2.47286900  | 1.05587800  | H           | 7.41451800                                                | 1.97342500  | 1.37493400  |
| C  | -2.86351400 | 1.88526300  | 1.99259600  | C           | 1.82269100                                                | 2.10794500  | 1.70134000  |
| C  | -4.97615800 | 3.28010000  | 2.20334500  | C           | 2.84877300                                                | 3.34247800  | -0.58443500 |
| C  | -3.92399400 | 2.45595100  | 2.95727000  | C           | 1.45477900                                                | 3.59374300  | 1.47099200  |
| H  | -4.00777900 | 2.73317600  | -0.38354300 | H           | 0.91113600                                                | 1.50875000  | 1.79097000  |
| H  | -6.18639500 | 1.64165800  | 1.46689400  | C           | 2.56148300                                                | 4.25361800  | 0.63058700  |
| H  | -4.49815500 | 4.18141500  | 1.79213600  | H           | 3.88502200                                                | 3.44841100  | -0.92147200 |
| H  | -2.33506600 | 2.73398100  | 1.52880700  | H           | 0.50215300                                                | 3.65441300  | 0.93198600  |
| H  | -3.43674900 | 3.06830800  | 3.72617000  | H           | 1.30837700                                                | 4.10939900  | 2.42734400  |
| H  | -5.00821200 | 1.31324800  | -0.67613800 | H           | 2.27584400                                                | 5.26279100  | 0.30930300  |
| H  | -6.29612700 | 3.09694000  | 0.48339700  | H           | 3.46694200                                                | 4.36150300  | 1.24091600  |
| H  | -2.10064800 | 1.32383800  | 2.53321100  | P           | 2.58817300                                                | 1.58157500  | 0.04646600  |
| H  | -5.75699500 | 3.62829600  | 2.89092700  | C           | 5.00812400                                                | -2.34272500 | -2.35016300 |
| H  | -4.41574100 | 1.62501600  | 3.48144100  | H           | 4.72799400                                                | -1.43410300 | -2.89270200 |
| C  | -3.49858400 | 1.07423800  | 0.87507800  | H           | 5.92066800                                                | -2.12588100 | -1.78845100 |
| C  | -3.20215300 | -0.21893100 | 0.59981800  | H           | 5.24749100                                                | -3.11117300 | -3.09405800 |
| C  | -2.17674000 | -0.97518700 | 1.45293100  | C           | 1.80692100                                                | -2.63472900 | 2.08335800  |
| H  | -2.35441600 | -2.05251400 | 1.38535900  | H           | 1.69827500                                                | -3.47099700 | 2.78420300  |
| H  | -2.24792500 | -0.70267400 | 2.50776400  | H           | 1.90040500                                                | -1.71834100 | 2.67501900  |
| C  | -0.74798700 | -0.71461300 | 0.98145500  | H           | 0.88721800                                                | -2.54176100 | 1.49825500  |
| O  | -0.41406500 | -1.14136900 | -0.17829200 | C           | 2.68306200                                                | 1.87787000  | 2.94779900  |
| O  | 0.05626700  | -0.08080800 | 1.71624900  | H           | 2.97367700                                                | 0.82793500  | 3.04937000  |





|    |             |             |             |                                              |              |             |             |
|----|-------------|-------------|-------------|----------------------------------------------|--------------|-------------|-------------|
| C  | 1.91590100  | -2.82235200 | 2.62723200  | H                                            | -4.79370600  | 1.84428800  | -2.75992100 |
| H  | 1.97412100  | -3.68349300 | 3.30328300  | H                                            | -1.80640600  | 3.38340900  | 0.92459200  |
| H  | 2.54280600  | -2.02865400 | 3.04642900  | H                                            | -4.94757400  | 4.22026500  | -1.93950900 |
| H  | 0.88204300  | -2.46153400 | 2.62510300  | H                                            | -4.20282100  | 3.90599700  | 0.38401100  |
| C  | 5.08126800  | 1.69338700  | 2.27533300  | C                                            | -3.30282200  | 1.02882000  | 1.06098500  |
| H  | 5.06766900  | 0.61662700  | 2.46815700  | C                                            | -3.70127000  | 1.78121300  | 2.09859600  |
| H  | 5.92039600  | 1.89577200  | 1.60401000  | H                                            | -4.24304600  | 1.35880200  | 2.94073800  |
| H  | 5.28677700  | 2.20101900  | 3.22498000  | H                                            | -3.48923500  | 2.84390700  | 2.18219500  |
| C  | 2.03738700  | 3.37796200  | -1.46342200 | C                                            | -2.48310500  | 1.58408900  | -0.11598100 |
| H  | 2.21153900  | 4.18245800  | -2.18750400 | C                                            | -1.06863500  | 0.94967400  | -0.06594800 |
| H  | 1.39718900  | 2.62057400  | -1.92333700 | O                                            | -0.42069300  | 0.76001200  | -1.13250100 |
| H  | 1.47265100  | 3.80102900  | -0.62531600 | O                                            | -0.56489800  | 0.69011400  | 1.07760500  |
| Cu | 1.22089100  | 0.12834700  | 0.24596300  | <b>8A</b>                                    |              |             |             |
| Si | -3.75572700 | -0.82218700 | 1.12613800  | Sum of electronic and thermal Free Energies= | -4981.811008 |             |             |
| C  | -2.41344300 | -1.93432800 | 0.38588300  | C                                            | 3.02064500   | 1.32369600  | 2.75109600  |
| H  | -1.47993500 | -1.77200400 | 0.93272000  | C                                            | 4.69104300   | 2.41725000  | 0.84011300  |
| H  | -2.69333100 | -2.99025000 | 0.47551900  | C                                            | 4.29505400   | 3.32638000  | 2.02605900  |
| H  | -2.21454700 | -1.72020800 | -0.66848900 | C                                            | 3.96950700   | 2.43861600  | 3.23590200  |
| C  | -3.99961700 | -1.34537200 | 2.93250700  | H                                            | 2.03425500   | 1.77288900  | 2.58440300  |
| H  | -3.10422400 | -1.13672800 | 3.52730200  | H                                            | 5.71560800   | 2.06076000  | 1.00025700  |
| H  | -4.84638200 | -0.83776300 | 3.40529900  | H                                            | 5.09328400   | 4.04584500  | 2.24313000  |
| H  | -4.19941400 | -2.42168500 | 2.98272900  | H                                            | 3.40636700   | 3.90990400  | 1.75524700  |
| C  | -5.39802500 | -1.12585100 | 0.21427700  | H                                            | 4.89009300   | 2.00194100  | 3.64556300  |
| C  | -5.57129700 | -2.18965200 | -0.68918800 | H                                            | 3.50910100   | 3.01403400  | 4.04815800  |
| C  | -6.51391000 | -0.30341500 | 0.46334900  | P                                            | 3.56357900   | 0.90794800  | 0.99125300  |
| C  | -6.79908100 | -2.42636700 | -1.31279000 | C                                            | 4.75061000   | -0.51582900 | 1.14142600  |
| H  | -4.73575300 | -2.84685300 | -0.91726800 | C                                            | 4.55931800   | -1.67576700 | 0.35105600  |
| C  | -7.74468000 | -0.53440100 | -0.15241000 | C                                            | 5.81912800   | -0.48918300 | 2.05487200  |
| H  | -6.41559400 | 0.54052000  | 1.14280200  | C                                            | 5.41767800   | -2.77314100 | 0.53968000  |
| C  | -7.89033800 | -1.59950600 | -1.04404700 | C                                            | 6.66670100   | -1.58185600 | 2.22079000  |
| H  | -6.90245700 | -3.25513900 | -2.00861800 | H                                            | 5.98929900   | 0.39771800  | 2.65622300  |
| H  | -8.58825700 | 0.11771600  | 0.05902200  | C                                            | 6.45746900   | -2.73563200 | 1.46531600  |
| H  | -8.84649200 | -1.78101300 | -1.52762000 | H                                            | 5.27916300   | -3.67491200 | -0.04802400 |
| C  | -3.15173700 | 1.26321100  | -1.48152900 | H                                            | 7.47943800   | -1.53471800 | 2.93984300  |
| C  | -4.38899200 | 2.12145100  | -1.77867700 | H                                            | 7.10418100   | -3.59939800 | 1.58994000  |
| C  | -2.21989800 | 3.12186300  | -0.05527900 | C                                            | 4.03987800   | -1.70775700 | -2.60317700 |
| C  | -4.05166400 | 3.61743300  | -1.74507800 | C                                            | 2.67256900   | -3.52695900 | -0.99089300 |
| C  | -3.43593600 | 4.00078200  | -0.39286300 | C                                            | 3.46051800   | -2.96623400 | -3.29166900 |
| H  | -2.39418700 | 1.42140100  | -2.25584600 | H                                            | 3.68080600   | -0.80847200 | -3.11364500 |
| H  | -5.17853700 | 1.90826100  | -1.04706600 | C                                            | 3.37223500   | -4.09287200 | -2.24863900 |
| H  | -3.33767300 | 3.84607500  | -2.54978900 | H                                            | 3.02147500   | -4.03058200 | -0.08388800 |
| H  | -1.43153400 | 3.33352100  | -0.78937600 | H                                            | 2.45723800   | -2.74703100 | -3.67602200 |
| H  | -3.12577800 | 5.05387000  | -0.39853700 | H                                            | 4.07252200   | -3.25496400 | -4.15437900 |
| H  | -3.41820400 | 0.20182000  | -1.53190300 | H                                            | 2.83304200   | -4.96308500 | -2.64144600 |

|    |             |             |             |    |             |             |             |
|----|-------------|-------------|-------------|----|-------------|-------------|-------------|
| H  | 4.38354000  | -4.43504700 | -1.99766400 | H  | -2.62202800 | 1.38403400  | 1.89573500  |
| P  | 3.18785600  | -1.71150600 | -0.90111600 | H  | -4.80643000 | -0.74946300 | 2.15782100  |
| C  | 2.83407000  | 0.14029800  | 3.70118000  | H  | -3.16940600 | 0.60358700  | 4.36464700  |
| H  | 2.10231500  | -0.56867300 | 3.30276900  | H  | -0.98417700 | -0.05969100 | 3.11302500  |
| H  | 3.76984000  | -0.39651700 | 3.88194200  | H  | -2.09502200 | -1.59433200 | 4.72101100  |
| H  | 2.45907300  | 0.49454900  | 4.66827600  | H  | -3.56742200 | 0.75339800  | 0.57306100  |
| C  | 4.61546100  | 3.10296800  | -0.52655900 | H  | -4.92199500 | 0.93156600  | 2.65098700  |
| H  | 5.27059500  | 3.98155800  | -0.55376700 | H  | -0.69512000 | -1.71626700 | 2.67604400  |
| H  | 4.92919700  | 2.43010400  | -1.33138600 | H  | -4.42160200 | -0.61393600 | 4.59032800  |
| H  | 3.59670600  | 3.43649200  | -0.74931800 | H  | -3.04339000 | -2.30964700 | 3.42310600  |
| C  | 5.57224200  | -1.66686700 | -2.60478900 | C  | -2.58245000 | -1.86648300 | 0.56307000  |
| H  | 5.95496500  | -0.80869100 | -2.04492500 | C  | -2.04856700 | -3.07681700 | 0.80940300  |
| H  | 6.01472800  | -2.56602200 | -2.16733100 | H  | -2.34295300 | -3.96163400 | 0.25297500  |
| H  | 5.93490100  | -1.58414900 | -3.63593000 | H  | -1.29712500 | -3.25249400 | 1.57535100  |
| C  | 1.14286500  | -3.65025600 | -1.05769500 | C  | -2.05436900 | -0.62634900 | 1.34157300  |
| H  | 0.84656400  | -4.70543900 | -1.07673700 | C  | -0.91628900 | -0.05018000 | 0.46512700  |
| H  | 0.66046700  | -3.17527700 | -0.19969900 | O  | 0.26938300  | -0.10004500 | 0.84279600  |
| H  | 0.73626800  | -3.17602000 | -1.95750800 | O  | -1.31534200 | 0.46510800  | -0.65454200 |
| Cu | 1.99287600  | 0.11008100  | -0.36293500 | B  | -0.53313900 | 1.40446000  | -1.60172300 |
| Si | -3.94753900 | -1.86807900 | -0.79677900 | O  | 0.83590300  | 0.86012600  | -1.90585200 |
| C  | -4.20643500 | -0.30221800 | -1.81640300 | O  | -1.24908500 | 1.33119200  | -2.87047700 |
| H  | -3.26667000 | 0.05349200  | -2.24622100 | C  | 0.76236000  | 0.19984700  | -3.17362300 |
| H  | -4.89184300 | -0.53908700 | -2.63986500 | C  | -0.36297200 | 0.94202200  | -3.89655400 |
| H  | -4.64346100 | 0.52842000  | -1.25561400 | H  | 0.03734200  | 1.82027400  | -4.42895500 |
| C  | -3.50490700 | -3.23472000 | -2.04272900 | H  | -0.87733600 | 0.30748800  | -4.62934200 |
| H  | -2.51918200 | -3.06075900 | -2.48800500 | H  | 1.72766400  | 0.27462000  | -3.68696400 |
| H  | -3.50987700 | -4.23887100 | -1.60814100 | H  | 0.51726200  | -0.86406300 | -3.03450100 |
| H  | -4.24308200 | -3.23010500 | -2.85248400 | Si | -0.49818500 | 3.33775800  | -0.87918700 |
| C  | -5.60198200 | -2.35445600 | 0.01413100  | C  | 0.45382000  | 4.44344700  | -2.11246500 |
| C  | -6.80930400 | -1.75018200 | -0.38330600 | H  | 0.50017900  | 5.48546500  | -1.77601800 |
| C  | -5.68105900 | -3.37107000 | 0.98557100  | H  | 1.48126400  | 4.08406600  | -2.24686300 |
| C  | -8.03654200 | -2.14344700 | 0.15609100  | H  | -0.02814400 | 4.43530500  | -3.09635200 |
| H  | -6.79712500 | -0.95617900 | -1.12501400 | C  | 0.34882100  | 3.57526400  | 0.81630200  |
| C  | -6.90291300 | -3.77071100 | 1.52859900  | H  | -0.14140500 | 2.99419700  | 1.60509400  |
| H  | -4.77056000 | -3.85280300 | 1.33414400  | H  | 1.38599900  | 3.23032200  | 0.75000300  |
| C  | -8.08670500 | -3.15672200 | 1.11372800  | H  | 0.36917300  | 4.62525600  | 1.13133200  |
| H  | -8.95176700 | -1.65592800 | -0.16968100 | C  | -2.26782700 | 4.03781500  | -0.72678000 |
| H  | -6.93168900 | -4.55806200 | 2.27753500  | C  | -3.23143300 | 3.76680300  | -1.72003400 |
| H  | -9.03956100 | -3.46374200 | 1.53653000  | C  | -2.67175000 | 4.83891700  | 0.35719800  |
| C  | -3.13090700 | 0.48031200  | 1.53357300  | C  | -4.52710300 | 4.28054200  | -1.63768900 |
| C  | -4.22228700 | 0.09396500  | 2.54398400  | H  | -2.96272200 | 3.13215800  | -2.56051100 |
| C  | -1.48405400 | -0.96346400 | 2.74435300  | C  | -3.96772800 | 5.35405200  | 0.44789100  |
| C  | -3.62914500 | -0.28463300 | 3.90736000  | H  | -1.96499800 | 5.06963100  | 1.15088500  |
| C  | -2.56475100 | -1.37945700 | 3.75298400  | C  | -4.90001400 | 5.07742800  | -0.55259700 |

|                                                           |             |             |             |    |             |             |             |
|-----------------------------------------------------------|-------------|-------------|-------------|----|-------------|-------------|-------------|
| H                                                         | -5.24888800 | 4.05534300  | -2.41925200 | H  | -0.76899500 | 1.98342100  | -3.61967800 |
| H                                                         | -4.24866100 | 5.96980400  | 1.29910000  | C  | 5.94153700  | 1.23539400  | 0.25442700  |
| H                                                         | -5.90925300 | 5.47586700  | -0.48617200 | H  | 5.84392100  | 2.10767900  | -0.39735600 |
| <b>TS7A</b>                                               |             |             |             | H  | 6.22349200  | 1.58678700  | 1.25241600  |
| Sum of electronic and thermal Free Energies= -4981.775658 |             |             |             | H  | 6.77562900  | 0.63058500  | -0.12029600 |
| C                                                         | -0.86807300 | 3.23746100  | 0.19942800  | C  | 2.23905500  | 0.88388100  | 3.55114900  |
| C                                                         | -0.05258600 | 3.64773000  | -2.40183900 | H  | 2.56068000  | 0.77815300  | 4.59419600  |
| C                                                         | -1.43628300 | 4.21331000  | -1.99889500 | H  | 1.62232200  | 1.78644600  | 3.48872500  |
| C                                                         | -1.44330400 | 4.48538000  | -0.49150300 | H  | 1.62014400  | 0.02293100  | 3.28676700  |
| H                                                         | -1.60023200 | 2.42545500  | 0.12149600  | Cu | 1.29649800  | -0.12529700 | 0.08407300  |
| H                                                         | 0.64604800  | 4.47817100  | -2.54459400 | Si | -4.15717800 | -1.15991200 | -1.27490400 |
| H                                                         | -1.67979300 | 5.10666100  | -2.58690200 | C  | -2.81819900 | -0.06346400 | -2.04070200 |
| H                                                         | -2.20637100 | 3.46535200  | -2.23188700 | H  | -1.94964000 | -0.66941200 | -2.31572400 |
| H                                                         | -0.82246200 | 5.35984800  | -0.25715500 | H  | -3.19420700 | 0.40583600  | -2.95701200 |
| H                                                         | -2.45236600 | 4.70929400  | -0.12178500 | H  | -2.46581900 | 0.72334500  | -1.36957800 |
| P                                                         | 0.54988500  | 2.62058300  | -0.90921300 | C  | -4.53859900 | -2.54123700 | -2.51291000 |
| C                                                         | 2.00466200  | 3.60214100  | -0.26265900 | H  | -3.68019500 | -3.20748700 | -2.64736600 |
| C                                                         | 3.03343800  | 2.96015700  | 0.47634500  | H  | -5.39924700 | -3.14964000 | -2.21787700 |
| C                                                         | 2.09182300  | 4.99546200  | -0.44612500 | H  | -4.77633800 | -2.09758900 | -3.48616500 |
| C                                                         | 4.07574200  | 3.74565300  | 1.00567800  | C  | -5.74827500 | -0.14778500 | -1.04461300 |
| C                                                         | 3.14024200  | 5.75111600  | 0.07126000  | C  | -5.83055500 | 1.21595600  | -1.37700800 |
| H                                                         | 1.31749900  | 5.51453300  | -0.99851400 | C  | -6.91853800 | -0.76682400 | -0.56345300 |
| C                                                         | 4.14038100  | 5.12137100  | 0.80845900  | C  | -7.02232800 | 1.93162500  | -1.23600900 |
| H                                                         | 4.85803100  | 3.27644000  | 1.58919600  | H  | -4.95292400 | 1.73497000  | -1.75439700 |
| H                                                         | 3.16691500  | 6.82486400  | -0.09212800 | C  | -8.11311300 | -0.06019600 | -0.42072500 |
| H                                                         | 4.96230700  | 5.69282600  | 1.22996600  | H  | -6.89798100 | -1.81957000 | -0.28865000 |
| C                                                         | 4.67452100  | 0.37434800  | 0.27168700  | C  | -8.16731900 | 1.29439100  | -0.75746900 |
| C                                                         | 3.45835000  | 0.98275800  | 2.62933600  | H  | -7.05614300 | 2.98517700  | -1.50101700 |
| C                                                         | 4.74760400  | -0.77825300 | 1.30021400  | H  | -9.00049500 | -0.56417200 | -0.04694100 |
| H                                                         | 4.52943200  | -0.04587300 | -0.72592100 | H  | -9.09579600 | 1.84798500  | -0.64747600 |
| C                                                         | 4.43388600  | -0.23024100 | 2.71388800  | C  | -3.35234900 | 0.27927400  | 1.66079000  |
| H                                                         | 4.00678900  | 1.89240700  | 2.89393200  | C  | -4.65932600 | 0.27522900  | 2.46833600  |
| H                                                         | 4.00537800  | -1.53578400 | 1.03287200  | C  | -2.64757500 | -1.84405800 | 2.81280900  |
| H                                                         | 5.72896000  | -1.26422100 | 1.25978400  | C  | -4.48410400 | -0.41815700 | 3.82511900  |
| H                                                         | 3.99695400  | -1.02010500 | 3.33183200  | C  | -3.94425100 | -1.84111000 | 3.63583200  |
| H                                                         | 5.35527200  | 0.08543500  | 3.21587000  | H  | -2.59704200 | 0.86276500  | 2.19813000  |
| P                                                         | 3.03143700  | 1.12942200  | 0.79934300  | H  | -5.44819900 | -0.22964000 | 1.89907100  |
| C                                                         | -0.54284900 | 3.41994000  | 1.68167700  | H  | -3.78127300 | 0.15931300  | 4.44307300  |
| H                                                         | -0.21424100 | 2.47886900  | 2.13040800  | H  | -1.87787000 | -1.30146100 | 3.37914500  |
| H                                                         | 0.23622700  | 4.17263000  | 1.83906300  | H  | -3.75051500 | -2.31148200 | 4.60784900  |
| H                                                         | -1.43799700 | 3.74881200  | 2.22337200  | H  | -3.50852400 | 0.79457400  | 0.70798800  |
| C                                                         | -0.09974600 | 2.84548600  | -3.70756600 | H  | -4.99536000 | 1.30964600  | 2.60846500  |
| H                                                         | -0.47135000 | 3.47272600  | -4.52724600 | H  | -2.26224300 | -2.85792400 | 2.68083600  |
| H                                                         | 0.88696700  | 2.47053400  | -3.99381400 | H  | -5.43581200 | -0.43987800 | 4.36959900  |

|                                              |              |             |             |   |             |             |             |
|----------------------------------------------|--------------|-------------|-------------|---|-------------|-------------|-------------|
| H                                            | -4.70615300  | -2.45172200 | 3.13779100  | H | 0.05174700  | -1.66924600 | -1.78304500 |
| C                                            | -3.59387100  | -1.93666900 | 0.37853000  | C | -0.78664800 | -2.45571300 | 2.08979200  |
| C                                            | -3.90294700  | -3.22995500 | 0.56120700  | H | 0.23893000  | -2.53491000 | 2.46498800  |
| H                                            | -4.43776800  | -3.80285100 | -0.19055000 | H | -1.42131000 | -2.09989300 | 2.90743700  |
| H                                            | -3.62912700  | -3.79053600 | 1.45059100  | H | -1.12867300 | -3.46416800 | 1.83254600  |
| C                                            | -2.77450100  | -1.13950900 | 1.42174000  | C | -2.71842500 | -1.21275100 | 0.07317200  |
| C                                            | -1.31566400  | -1.04259300 | 0.91809500  | C | -3.21522400 | -1.69925500 | -1.14869600 |
| O                                            | -0.71291800  | 0.03910400  | 0.81084000  | C | -3.64490800 | -0.64617600 | 0.96948100  |
| O                                            | -0.76146200  | -2.19759000 | 0.68390900  | C | -4.57403000 | -1.62492600 | -1.46408000 |
| B                                            | 0.74545800   | -2.34637600 | 0.61276000  | H | -2.53438900 | -2.14370800 | -1.86989700 |
| O                                            | 1.38022200   | -1.87212100 | 1.83038400  | C | -5.00347300 | -0.56945500 | 0.66277400  |
| O                                            | 1.02755200   | -3.74973000 | 0.49569900  | H | -3.30027100 | -0.25147600 | 1.92308200  |
| C                                            | 1.64825200   | -3.03020900 | 2.62645500  | C | -5.47152900 | -1.06003000 | -0.55808300 |
| C                                            | 1.84778400   | -4.13914100 | 1.59016100  | H | -4.93050100 | -2.00817500 | -2.41636500 |
| H                                            | 2.89864100   | -4.20532600 | 1.27350100  | H | -5.69644100 | -0.12688100 | 1.37325300  |
| H                                            | 1.53372600   | -5.12437300 | 1.95493800  | H | -6.52890300 | -1.00139000 | -0.80065500 |
| H                                            | 2.52919900   | -2.85536300 | 3.25318000  | C | -0.73444600 | 1.51174000  | -1.25150200 |
| H                                            | 0.79146000   | -3.24592800 | 3.28190600  | C | -1.94208900 | 2.36086300  | -0.83121500 |
| Si                                           | 1.45646500   | -1.90858700 | -1.57584700 | C | 0.70942900  | 2.76562500  | 0.39257400  |
| C                                            | 1.48435300   | -0.46203400 | -2.84937000 | C | -1.51223100 | 3.75025800  | -0.34520500 |
| H                                            | 1.72525600   | -0.88510700 | -3.83335700 | C | -0.49431300 | 3.63215700  | 0.79576800  |
| H                                            | 0.49754500   | 0.00127100  | -2.92022300 | H | -0.23551100 | 1.98437800  | -2.10493100 |
| H                                            | 2.20149400   | 0.33727900  | -2.64369800 | H | -2.49930400 | 1.84982600  | -0.03718600 |
| C                                            | 0.12887600   | -3.05168500 | -2.32752200 | H | -1.06222000 | 4.30633800  | -1.18016500 |
| H                                            | 0.11449700   | -4.02643100 | -1.83614000 | H | 1.23756000  | 3.27274900  | -0.42650600 |
| H                                            | -0.86736400  | -2.61442500 | -2.20828100 | H | -0.13295400 | 4.62415500  | 1.09312900  |
| H                                            | 0.31078800   | -3.19894700 | -3.39831000 | H | -1.06827700 | 0.53321900  | -1.60786000 |
| C                                            | 3.15104100   | -2.76288300 | -1.81852300 | H | -2.62855100 | 2.44874000  | -1.68130300 |
| C                                            | 4.23374600   | -2.07642100 | -2.40207000 | H | 1.43055500  | 2.68558300  | 1.20968100  |
| C                                            | 3.35784800   | -4.12307300 | -1.51201500 | H | -2.38414400 | 4.32876000  | -0.01748400 |
| C                                            | 5.46556600   | -2.69426600 | -2.63413400 | H | -0.98945200 | 3.20233000  | 1.67375800  |
| H                                            | 4.11297200   | -1.03942700 | -2.70426000 | C | -0.15869300 | 0.36425500  | 0.97955500  |
| C                                            | 4.58394300   | -4.75027000 | -1.74298700 | C | -0.03130400 | 0.65589500  | 2.28335000  |
| H                                            | 2.53900200   | -4.69602600 | -1.09106300 | H | -0.32867600 | -0.04476100 | 3.05784400  |
| C                                            | 5.64735900   | -4.03623200 | -2.29892900 | H | 0.38001200  | 1.59255600  | 2.64930300  |
| H                                            | 6.27728000   | -2.13045400 | -3.08765500 | C | 0.31668800  | 1.34429700  | -0.12254200 |
| H                                            | 4.70667000   | -5.80205800 | -1.49579900 | C | 1.59309900  | 0.74609900  | -0.73486900 |
| H                                            | 6.60170700   | -4.52350000 | -2.48074400 | O | 1.75673400  | 0.45135700  | -1.89463600 |
| <b>P<sub>0-1</sub></b>                       |              |             |             | O | 2.59643600  | 0.63187000  | 0.18872800  |
| Sum of electronic and thermal Free Energies= | -1355.349899 |             |             | B | 3.70737100  | -0.16444600 | -0.01458300 |
| Si                                           | -0.88577200  | -1.35693600 | 0.54874200  | O | 4.96429700  | 0.28862100  | 0.27963500  |
| C                                            | 0.07115700   | -2.21459700 | -0.83622100 | O | 3.65102200  | -1.47271000 | -0.41581800 |
| H                                            | 1.12399300   | -2.33955400 | -0.56361600 | C | 5.85631200  | -0.82966100 | 0.14586600  |
| H                                            | -0.34819100  | -3.21261800 | -1.00783400 | C | 5.00626500  | -1.93373800 | -0.53470700 |

|   |            |             |             |
|---|------------|-------------|-------------|
| H | 5.24786000 | -2.04876600 | -1.59697900 |
| H | 5.10297600 | -2.90720300 | -0.04602300 |
| H | 6.72290400 | -0.53236800 | -0.45109200 |
| H | 6.20345100 | -1.12662400 | 1.14191000  |

**P<sub>1</sub>**

Sum of electronic and thermal Free Energies= -952.693767

|    |             |             |             |
|----|-------------|-------------|-------------|
| C  | 1.08054000  | -1.14578500 | 1.25204600  |
| C  | 1.07884000  | -2.60363200 | 0.74453300  |
| C  | 3.13939600  | -0.66279200 | -0.09412200 |
| C  | 2.48842900  | -3.07674700 | 0.36882000  |
| C  | 3.14782500  | -2.11248900 | -0.62475500 |
| H  | 1.64642400  | -1.10900500 | 2.19637900  |
| H  | 0.42101300  | -2.67014700 | -0.13150900 |
| H  | 3.10626400  | -3.13622700 | 1.27659100  |
| H  | 3.75174100  | -0.62938100 | 0.82065800  |
| H  | 4.17836000  | -2.42288700 | -0.83553900 |
| H  | 0.05701200  | -0.84759800 | 1.48686500  |
| H  | 0.64682100  | -3.25796400 | 1.51102900  |
| H  | 3.62576600  | 0.00037700  | -0.81168100 |
| H  | 2.45175800  | -4.08996400 | -0.04930500 |
| H  | 2.60631000  | -2.14492000 | -1.57979000 |
| C  | 1.73632500  | -0.19843700 | 0.26214700  |
| C  | 1.14067300  | 0.91219200  | -0.23838000 |
| C  | 1.87028900  | 1.82602000  | -1.22449100 |
| H  | 2.51517300  | 1.24219400  | -1.89069400 |
| H  | 1.14554000  | 2.31682800  | -1.88224200 |
| Si | -0.59533000 | 1.47915400  | 0.30724000  |
| C  | -1.09429900 | 3.03728200  | -0.65537100 |
| H  | -0.39488100 | 3.86537600  | -0.49896100 |
| H  | -1.16445300 | 2.85266100  | -1.73211600 |
| H  | -2.08244000 | 3.37048200  | -0.31895100 |
| C  | -0.64484600 | 1.93153300  | 2.15005300  |
| H  | 0.10104600  | 2.70563700  | 2.36147900  |
| H  | -1.62227300 | 2.33620200  | 2.43575100  |
| H  | -0.43028400 | 1.08061700  | 2.80286000  |
| C  | -1.90119600 | 0.15087900  | -0.06889300 |
| C  | -3.07833800 | 0.03843300  | 0.69352100  |
| C  | -1.75705900 | -0.71888300 | -1.16612500 |
| C  | -4.06661400 | -0.89565200 | 0.37673100  |
| H  | -3.23061300 | 0.68578900  | 1.55387800  |
| C  | -2.74168500 | -1.65314500 | -1.49141100 |
| H  | -0.85380100 | -0.67188000 | -1.76964700 |
| C  | -3.90066500 | -1.74390300 | -0.71865100 |
| H  | -4.96410400 | -0.96275300 | 0.98584400  |

|   |             |             |             |
|---|-------------|-------------|-------------|
| H | -2.60365800 | -2.31171400 | -2.34482100 |
| H | -4.66775500 | -2.47205500 | -0.96717200 |
| C | 2.71751500  | 2.91290200  | -0.53876600 |
| H | 3.20210600  | 3.56122600  | -1.27735900 |
| H | 2.10483800  | 3.54817300  | 0.11022900  |
| H | 3.49793100  | 2.46612900  | 0.08555400  |

**TS8A**

Sum of electronic and thermal Free Energies= -3938.357823

|   |             |             |             |
|---|-------------|-------------|-------------|
| C | 0.30601600  | -2.02408500 | 2.59797400  |
| C | 0.26703600  | 0.61504600  | 3.35053500  |
| C | -0.83135400 | -0.24824200 | 4.00095300  |
| C | -0.32844300 | -1.69800300 | 3.98064900  |
| H | -0.42614400 | -2.53012300 | 1.96191600  |
| H | 1.16191900  | 0.53242000  | 3.98175900  |
| H | -1.04444100 | 0.09478900  | 5.02025600  |
| H | -1.76541100 | -0.15397700 | 3.43093400  |
| H | 0.44030400  | -1.81184100 | 4.75583200  |
| H | -1.12503100 | -2.41100700 | 4.21797600  |
| P | 0.55960300  | -0.33482600 | 1.75904200  |
| C | 2.35540900  | -0.18493500 | 1.33891800  |
| C | 2.86215200  | -0.84047900 | 0.18602900  |
| C | 3.22233200  | 0.60611100  | 2.11055300  |
| C | 4.22577600  | -0.70262800 | -0.11853500 |
| C | 4.56988000  | 0.74181500  | 1.77794500  |
| H | 2.85137400  | 1.12629900  | 2.98692600  |
| C | 5.07745500  | 0.07786900  | 0.66274800  |
| H | 4.63511200  | -1.21141700 | -0.98562500 |
| H | 5.21922000  | 1.35666900  | 2.39481500  |
| H | 6.12706900  | 0.16910400  | 0.39805800  |
| C | 1.54615100  | -1.05734400 | -2.52014800 |
| C | 2.83591400  | -3.28926100 | -1.46714300 |
| C | 1.97317100  | -2.16229100 | -3.51419200 |
| H | 0.47810100  | -0.85085100 | -2.63991700 |
| C | 3.18180400  | -2.90307300 | -2.92253100 |
| H | 3.73743200  | -3.32991800 | -0.84724700 |
| H | 1.14677900  | -2.86851800 | -3.66014800 |
| H | 2.19691600  | -1.73455600 | -4.49901500 |
| H | 3.44591500  | -3.78745200 | -3.51595400 |
| H | 4.05633800  | -2.24091600 | -2.93821600 |
| P | 1.69931400  | -1.90407400 | -0.81061600 |
| C | 1.53945900  | -2.92041100 | 2.73689200  |
| H | 1.94352900  | -3.21451600 | 1.76540300  |
| H | 2.33724600  | -2.42505900 | 3.30062800  |
| H | 1.26859500  | -3.83667500 | 3.27531100  |

|    |             |             |             |                                              |              |             |             |
|----|-------------|-------------|-------------|----------------------------------------------|--------------|-------------|-------------|
| C  | -0.10557100 | 2.08650500  | 3.17853200  | C                                            | -4.99833400  | 0.10269500  | -1.60047800 |
| H  | -0.35720700 | 2.53422300  | 4.14703800  | C                                            | -6.21564500  | -0.10893200 | 0.89055500  |
| H  | 0.71538200  | 2.66508800  | 2.74542400  | H                                            | -4.50263200  | -1.26101000 | 1.46429200  |
| H  | -0.96938400 | 2.20136200  | 2.51690600  | C                                            | -6.23637300  | 0.71153900  | -1.37494400 |
| C  | 2.30774100  | 0.25644300  | -2.72371300 | H                                            | -4.54903700  | 0.18909400  | -2.58743800 |
| H  | 2.01671300  | 1.00888300  | -1.98636700 | C                                            | -6.85185400  | 0.60727000  | -0.12706100 |
| H  | 3.39219300  | 0.13186100  | -2.65398800 | H                                            | -6.68750300  | -0.20102100 | 1.86628600  |
| H  | 2.08202500  | 0.66058800  | -3.71805400 | H                                            | -6.72290400  | 1.26326800  | -2.17618400 |
| C  | 2.12146600  | -4.64742700 | -1.37174800 | H                                            | -7.81581700  | 1.07651800  | 0.05154700  |
| H  | 2.76718400  | -5.44877700 | -1.75064100 | <b>9A</b>                                    |              |             |             |
| H  | 1.85586000  | -4.88816300 | -0.33781100 | Sum of electronic and thermal Free Energies= | -3938.357823 |             |             |
| H  | 1.19464100  | -4.66247000 | -1.95526500 | C                                            | -0.78156600  | -2.11678700 | 2.29847700  |
| Cu | -0.98442700 | -0.06177700 | 0.12958300  | C                                            | -0.40309100  | 0.45496500  | 3.18591900  |
| C  | 1.61892500  | 3.35947400  | -0.04985000 | C                                            | -1.10107000  | -0.52796500 | 4.16726300  |
| C  | 2.53695600  | 3.97953800  | -1.12244200 | C                                            | -0.71560000  | -1.97361700 | 3.82790000  |
| C  | -0.17179200 | 5.09506800  | -0.60510200 | H                                            | -1.82968300  | -2.02988600 | 1.98599500  |
| C  | 2.23488000  | 5.47050300  | -1.33221000 | H                                            | 0.55526200   | 0.78173200  | 3.60286400  |
| C  | 0.75594400  | 5.69766200  | -1.67731600 | H                                            | -0.86711200  | -0.27068200 | 5.20665900  |
| H  | 1.86126400  | 3.82215200  | 0.91985300  | H                                            | -2.18655800  | -0.41619200 | 4.05342000  |
| H  | 2.39382800  | 3.44444200  | -2.07042000 | H                                            | 0.29946300   | -2.20011200 | 4.17717400  |
| H  | 2.48162200  | 6.02348600  | -0.41412100 | H                                            | -1.38358400  | -2.69312900 | 4.31737500  |
| H  | -0.02952000 | 5.64767200  | 0.33664100  | P                                            | -0.01357900  | -0.53466400 | 1.62047000  |
| H  | 0.54799000  | 6.76893700  | -1.78641100 | C                                            | 1.80472800   | -0.92633900 | 1.69136600  |
| H  | 1.80622000  | 2.28865700  | 0.05481400  | C                                            | 2.48663200   | -1.27556500 | 0.49736500  |
| H  | 3.58510700  | 3.83601900  | -0.83420900 | C                                            | 2.49976800   | -0.99127900 | 2.91175900  |
| H  | -1.22194700 | 5.20697200  | -0.88810100 | C                                            | 3.80911400   | -1.74308200 | 0.58937700  |
| H  | 2.87572800  | 5.87851700  | -2.12290400 | C                                            | 3.82541000   | -1.41759700 | 2.97466200  |
| H  | 0.53233500  | 5.23074400  | -2.64577300 | H                                            | 2.00468700   | -0.71242300 | 3.83532100  |
| C  | 0.15649300  | 3.62510000  | -0.35519600 | C                                            | 4.47860700   | -1.81490700 | 1.80918500  |
| C  | -0.78749800 | 2.71733300  | -0.42957600 | H                                            | 4.32894700   | -2.05621400 | -0.30990800 |
| C  | -1.86745300 | 1.96091200  | -0.57326600 | H                                            | 4.33704700   | -1.45375300 | 3.93222300  |
| H  | -2.22279700 | 1.66512800  | -1.55737200 | H                                            | 5.50346100   | -2.17299200 | 1.84670700  |
| H  | -2.59311000 | 1.84976900  | 0.23283300  | C                                            | 2.68008100   | -0.02405600 | -2.26706400 |
| Si | -2.59384300 | -1.39000100 | -0.85293900 | C                                            | 2.05262300   | -2.72959000 | -2.04951800 |
| C  | -2.71714500 | -3.18528100 | -0.18421000 | C                                            | 2.75143000   | -0.86642100 | -3.56106600 |
| H  | -1.76251100 | -3.70418700 | -0.33224600 | H                                            | 2.08212100   | 0.87815300  | -2.42802400 |
| H  | -2.93810100 | -3.21200100 | 0.88912100  | C                                            | 3.05053000   | -2.31982800 | -3.15924200 |
| H  | -3.49673600 | -3.76279100 | -0.69617500 | H                                            | 2.52418400   | -3.41358700 | -1.33651600 |
| C  | -2.41422900 | -1.61585000 | -2.75338000 | H                                            | 1.79078600   | -0.82306700 | -4.08914400 |
| H  | -3.27549400 | -2.13843400 | -3.18827600 | H                                            | 3.50748500   | -0.46608200 | -4.24727500 |
| H  | -2.29951000 | -0.66564400 | -3.28841500 | H                                            | 2.98301000   | -2.99818600 | -4.01835200 |
| H  | -1.52304400 | -2.21687600 | -2.97261900 | H                                            | 4.07897100   | -2.38997600 | -2.78486600 |
| C  | -4.33270300 | -0.62585700 | -0.59578100 | P                                            | 1.60802500   | -1.11520600 | -1.13473700 |
| C  | -4.97776700 | -0.70835200 | 0.65507000  | C                                            | -0.21283000  | -3.42587900 | 1.75316900  |

|    |             |             |             |                                              |              |             |             |
|----|-------------|-------------|-------------|----------------------------------------------|--------------|-------------|-------------|
| H  | -0.27827600 | -3.46839500 | 0.66263200  | H                                            | -3.90299000  | -3.09357800 | -1.21720200 |
| H  | 0.83519200  | -3.55708800 | 2.03984900  | C                                            | -4.17000800  | 0.04579000  | -0.67702800 |
| H  | -0.77865300 | -4.27637800 | 2.14969800  | C                                            | -5.46483700  | -0.40344600 | -1.00199400 |
| C  | -1.26169600 | 1.69744300  | 2.91658400  | C                                            | -4.08491400  | 1.24361500  | 0.05524200  |
| H  | -1.45092900 | 2.23207900  | 3.85507300  | C                                            | -6.60813000  | 0.29889500  | -0.61627100 |
| H  | -0.77991200 | 2.38840500  | 2.22164500  | H                                            | -5.58689400  | -1.32321300 | -1.57061700 |
| H  | -2.23213600 | 1.41848400  | 2.49376400  | C                                            | -5.22068900  | 1.95855200  | 0.44692000  |
| C  | 4.06574600  | 0.42019400  | -1.78398300 | H                                            | -3.10327900  | 1.62886500  | 0.32229000  |
| H  | 4.03205100  | 0.86406200  | -0.78666500 | C                                            | -6.48958300  | 1.48545200  | 0.11196800  |
| H  | 4.78485900  | -0.40319900 | -1.75418400 | H                                            | -7.59285200  | -0.07738200 | -0.88378300 |
| H  | 4.46414500  | 1.17446400  | -2.47326600 | H                                            | -5.11423800  | 2.88250000  | 1.01061000  |
| C  | 0.79385800  | -3.40233900 | -2.61654100 | H                                            | -7.37787800  | 2.03473800  | 0.41316100  |
| H  | 1.05421100  | -4.34517400 | -3.11213700 | <b>TS9A</b>                                  |              |             |             |
| H  | 0.06356700  | -3.62224600 | -1.83292200 | Sum of electronic and thermal Free Energies= | -3938.346537 |             |             |
| H  | 0.29280600  | -2.76473500 | -3.35250900 | C                                            | 2.23559200   | -2.46272100 | -0.64267000 |
| Cu | -0.65404600 | 0.16007300  | -0.43219400 | C                                            | 1.04013500   | -1.20271300 | -2.78859500 |
| C  | 1.67248600  | 2.97024200  | 0.96739400  | C                                            | 2.56489700   | -1.40738900 | -2.87522700 |
| C  | 3.10018100  | 3.51251400  | 0.74838600  | C                                            | 2.91440100   | -2.63018100 | -2.01877500 |
| C  | 0.86092700  | 4.36731100  | -0.99870100 | H                                            | 2.84798000   | -1.77840600 | -0.04467800 |
| C  | 3.08785200  | 4.90162400  | 0.09465700  | H                                            | 0.55598600   | -2.03817800 | -3.31043400 |
| C  | 2.29461700  | 4.88447600  | -1.21904200 | H                                            | 2.87876500   | -1.53097100 | -3.91863500 |
| H  | 1.19070500  | 3.59905300  | 1.73405000  | H                                            | 3.08141800   | -0.52055000 | -2.48588800 |
| H  | 3.65378100  | 2.82042100  | 0.10127900  | H                                            | 2.53914100   | -3.54047700 | -2.50699100 |
| H  | 2.62986200  | 5.62526900  | 0.78476400  | H                                            | 3.99746400   | -2.75607700 | -1.90455700 |
| H  | 0.32629900  | 5.09778900  | -0.36957100 | P                                            | 0.66613000   | -1.43178900 | -0.95020400 |
| H  | 2.26615500  | 5.88739200  | -1.66269200 | C                                            | -0.75686400  | -2.62030200 | -0.89962200 |
| H  | 1.70351600  | 1.95187700  | 1.36434100  | C                                            | -1.85945100  | -2.37735800 | -0.04425300 |
| H  | 3.63480600  | 3.54341800  | 1.70576000  | C                                            | -0.73577500  | -3.79716900 | -1.66728300 |
| H  | 0.31801500  | 4.30741300  | -1.94611000 | C                                            | -2.86729700  | -3.35294200 | 0.04424300  |
| H  | 4.11400700  | 5.24655400  | -0.08183400 | C                                            | -1.75299300  | -4.74491500 | -1.57763900 |
| H  | 2.80532500  | 4.23367600  | -1.94222800 | H                                            | 0.09477200   | -3.98472500 | -2.34076700 |
| C  | 0.83364300  | 3.01442400  | -0.29406700 | C                                            | -2.81810900  | -4.52697900 | -0.70486200 |
| C  | 0.10439700  | 2.01143600  | -0.77718900 | H                                            | -3.71191700  | -3.19508100 | 0.70592700  |
| C  | -0.81623400 | 1.65104700  | -1.74931000 | H                                            | -1.70823300  | -5.64901400 | -2.17805000 |
| H  | -0.48567300 | 1.28571000  | -2.72187500 | H                                            | -3.61298600  | -5.26175800 | -0.61324000 |
| H  | -1.82666800 | 2.05827600  | -1.74875500 | C                                            | -3.43948700  | 0.16929200  | 0.23011900  |
| Si | -2.59468100 | -0.92471300 | -1.21623500 | C                                            | -2.81522300  | -1.25977100 | 2.53164300  |
| C  | -2.70259200 | -0.97578200 | -3.13361300 | C                                            | -4.39487100  | 0.32661100  | 1.43691200  |
| H  | -2.61704700 | 0.02393500  | -3.57377200 | H                                            | -3.01910100  | 1.14034400  | -0.04644500 |
| H  | -1.89584300 | -1.59002900 | -3.55186100 | C                                            | -4.30982000  | -0.93789700 | 2.30636300  |
| H  | -3.65300500 | -1.40484400 | -3.47481600 | H                                            | -2.66154100  | -2.32926800 | 2.70968700  |
| C  | -2.97972100 | -2.74747100 | -0.73502100 | H                                            | -4.09496200  | 1.19773500  | 2.03136900  |
| H  | -2.17768000 | -3.41934100 | -1.06221100 | H                                            | -5.42080600  | 0.51709700  | 1.10014400  |
| H  | -3.10805000 | -2.88663600 | 0.34370300  | H                                            | -4.83399700  | -0.80858300 | 3.26167600  |

|    |             |             |             |                                              |             |             |              |
|----|-------------|-------------|-------------|----------------------------------------------|-------------|-------------|--------------|
| H  | -4.80417600 | -1.76846200 | 1.78869500  | C                                            | 1.80213200  | -1.03631100 | 2.88418300   |
| P  | -1.94098500 | -0.78422000 | 0.91350400  | H                                            | 0.86928800  | -1.22037000 | 3.42549700   |
| C  | 2.07986500  | -3.77213200 | 0.13541300  | H                                            | 1.94531900  | -1.85556500 | 2.17887400   |
| H  | 1.53703600  | -3.63478000 | 1.07492400  | H                                            | 2.61418800  | -1.07599700 | 3.62245400   |
| H  | 1.54402900  | -4.52923400 | -0.44339400 | C                                            | 3.41355800  | 0.84144200  | 1.07061200   |
| H  | 3.06833900  | -4.17807000 | 0.38030300  | C                                            | 4.59886300  | 0.30086500  | 1.60720900   |
| C  | 0.54201400  | 0.10795200  | -3.39366900 | C                                            | 3.51687200  | 1.49324000  | -0.17425900  |
| H  | 0.86702800  | 0.18789800  | -4.43810400 | C                                            | 5.82297600  | 0.40527400  | 0.94274000   |
| H  | -0.54945200 | 0.16612600  | -3.37689000 | H                                            | 4.57129900  | -0.21297100 | 2.56534600   |
| H  | 0.91681600  | 0.97512400  | -2.84309200 | C                                            | 4.73791400  | 1.60487900  | -0.84459500  |
| C  | -4.11303300 | -0.42749900 | -1.01005700 | H                                            | 2.63043200  | 1.91985500  | -0.63652900  |
| H  | -3.39528700 | -0.58474500 | -1.82080600 | C                                            | 5.89649200  | 1.06031100  | -0.28759200  |
| H  | -4.59596900 | -1.38799600 | -0.80677200 | H                                            | 6.71850500  | -0.02231000 | 1.38659300   |
| H  | -4.88255700 | 0.26226500  | -1.37581300 | H                                            | 4.78358400  | 2.12009000  | -1.80073200  |
| C  | -2.22975300 | -0.47334000 | 3.71466300  | H                                            | 6.84737800  | 1.14692000  | -0.80643100  |
| H  | -2.75639200 | -0.72974700 | 4.64143600  | <b>10A</b>                                   |             |             |              |
| H  | -1.16908600 | -0.69325700 | 3.85659300  | Sum of electronic and thermal Free Energies= |             |             | -3938.408638 |
| H  | -2.32125600 | 0.60862900  | 3.56948500  | C                                            | 0.65320000  | -3.04298800 | -0.01621000  |
| Cu | 0.04574100  | 0.30116200  | 0.32076000  | C                                            | -0.07382600 | -2.11890000 | -2.51804300  |
| C  | -1.59821900 | 2.96380400  | -2.23076000 | C                                            | 1.16625500  | -3.03481700 | -2.44293500  |
| C  | -2.91784100 | 3.76201300  | -2.17960000 | C                                            | 1.01566400  | -3.94169100 | -1.21631300  |
| C  | -0.53532900 | 4.61717100  | -0.63961900 | H                                            | 1.56619100  | -2.51767400 | 0.28902300   |
| C  | -2.66786500 | 5.24546600  | -1.87104600 | H                                            | -0.93041800 | -2.71819900 | -2.85114900  |
| C  | -1.85369900 | 5.41583300  | -0.58015800 | H                                            | 1.27908900  | -3.60709300 | -3.37165000  |
| H  | -1.02497100 | 3.31492100  | -3.10605000 | H                                            | 2.06823700  | -2.42018000 | -2.33053200  |
| H  | -3.56205100 | 3.33717800  | -1.39645900 | H                                            | 0.22067600  | -4.68059200 | -1.38795300  |
| H  | -2.11509200 | 5.69860000  | -2.70730000 | H                                            | 1.93386800  | -4.50484400 | -1.01139100  |
| H  | 0.09743900  | 5.06875300  | -1.42243000 | P                                            | -0.40829000 | -1.63908200 | -0.71944800  |
| H  | -1.64756000 | 6.47857100  | -0.39748000 | C                                            | -2.17956300 | -2.14238800 | -0.44111700  |
| H  | -1.79973600 | 1.89977500  | -2.38653800 | C                                            | -3.04858300 | -1.24080700 | 0.21941600   |
| H  | -3.46289000 | 3.65712300  | -3.12683700 | C                                            | -2.67148900 | -3.40263100 | -0.82320900  |
| H  | 0.01108100  | 4.72086100  | 0.30358100  | C                                            | -4.36198500 | -1.65065800 | 0.50809800   |
| H  | -3.61957200 | 5.78718100  | -1.79798300 | C                                            | -3.97994300 | -3.78818900 | -0.54053900  |
| H  | -2.44940800 | 5.05844400  | 0.27143500  | H                                            | -2.01911900 | -4.09947900 | -1.34044900  |
| C  | -0.77323700 | 3.14822000  | -0.96921800 | C                                            | -4.82697000 | -2.91038500 | 0.13831000   |
| C  | -0.34018700 | 2.12560800  | -0.21907300 | H                                            | -5.03526400 | -0.97603400 | 1.02819100   |
| C  | 0.43521800  | 2.20745400  | 1.03084000  | H                                            | -4.33396000 | -4.77058000 | -0.84011000  |
| H  | -0.13244600 | 2.49434300  | 1.91952500  | H                                            | -5.84633600 | -3.20360800 | 0.37314900   |
| H  | 1.36641100  | 2.78290900  | 0.98423800  | C                                            | -3.35558800 | 1.69792500  | -0.36535000  |
| Si | 1.77065500  | 0.68755800  | 2.03567200  | C                                            | -3.28399400 | 0.86756100  | 2.29918000   |
| C  | 1.88512900  | 1.81912400  | 3.56891300  | C                                            | -3.92040100 | 2.67163100  | 0.69557400   |
| H  | 1.97772800  | 2.88111800  | 3.32426800  | H                                            | -2.60177500 | 2.21364500  | -0.96846800  |
| H  | 0.99841300  | 1.69660300  | 4.20324800  | C                                            | -4.41031700 | 1.84814300  | 1.89743100   |
| H  | 2.75672200  | 1.53911900  | 4.17140200  | H                                            | -3.69797900 | -0.05259700 | 2.72408000   |



|    |             |             |             |                                              |            |              |             |
|----|-------------|-------------|-------------|----------------------------------------------|------------|--------------|-------------|
| H  | -3.12924300 | 3.35776000  | 1.01980600  | H                                            | 1.07887700 | -0.07896900  | 3.86648700  |
| H  | -4.72015400 | 3.28844500  | 0.26895900  | H                                            | 0.59966400 | -0.66610400  | 2.26839000  |
| H  | -4.69105800 | 2.49222700  | 2.73972400  | H                                            | 1.77392300 | -1.58180500  | 3.23679700  |
| H  | -5.31113100 | 1.28971200  | 1.61408200  | C                                            | 4.07684400 | 0.91582800   | 3.49735900  |
| P  | -2.39431100 | 0.43638200  | 0.68396600  | H                                            | 3.60438900 | 1.51859600   | 4.28185300  |
| C  | 0.09849700  | -3.78330400 | 1.20173300  | H                                            | 4.50322700 | 0.02700300   | 3.97600200  |
| H  | -0.11484600 | -3.09824100 | 2.02754600  | H                                            | 4.90743700 | 1.49865600   | 3.08496200  |
| H  | -0.82227800 | -4.32576300 | 0.96861000  | C                                            | 3.71873000 | -0.59569500  | 0.85071800  |
| H  | 0.83459000  | -4.51226300 | 1.56040500  | C                                            | 4.35387400 | -1.79840300  | 1.21872000  |
| C  | 0.09413400  | -0.92554100 | -3.46034600 | C                                            | 3.82459900 | -0.19395700  | -0.49454400 |
| H  | 0.32515100  | -1.27030000 | -4.47536900 | C                                            | 5.05978100 | -2.56872600  | 0.29220200  |
| H  | -0.81605800 | -0.31995800 | -3.51534500 | H                                            | 4.30402100 | -2.14359800  | 2.25008700  |
| H  | 0.90648400  | -0.27220000 | -3.12867900 | C                                            | 4.53630400 | -0.95627100  | -1.42586500 |
| C  | -4.42759700 | 1.14737800  | -1.31276900 | H                                            | 3.32730500 | 0.71678000   | -0.81576100 |
| H  | -4.01802900 | 0.40772800  | -2.00665300 | C                                            | 5.15453700 | -2.14618800  | -1.03593900 |
| H  | -5.25525300 | 0.67140700  | -0.77934900 | H                                            | 5.54104900 | -3.49158600  | 0.60618700  |
| H  | -4.84421600 | 1.96882300  | -1.90744400 | H                                            | 4.61031100 | -0.61832000  | -2.45661000 |
| C  | -2.29825200 | 1.47343400  | 3.31007300  | H                                            | 5.70951800 | -2.73801700  | -1.75923200 |
| H  | -2.81781400 | 1.73140000  | 4.24046600  |                                              |            |              |             |
| H  | -1.49521600 | 0.77112100  | 3.55155200  | <b>TS10A</b>                                 |            |              |             |
| H  | -1.82766500 | 2.38277600  | 2.92236400  | Sum of electronic and thermal Free Energies= |            | -4126.969204 |             |
| Cu | -0.16198300 | 0.46918500  | 0.13968100  | C                                            | 2.54177600 | -2.84234500  | -1.25913000 |
| C  | 0.41883900  | 2.65046700  | -2.06510100 | C                                            | 2.59048200 | -2.89809400  | 1.51491500  |
| C  | -0.34067900 | 3.96551400  | -2.33066800 | C                                            | 2.35433400 | -4.23827800  | 0.78368400  |
| C  | 2.29574700  | 3.91155700  | -0.98562500 | C                                            | 3.02137900 | -4.14920000  | -0.59494800 |
| C  | 0.63063100  | 5.14668700  | -2.46586000 | H                                            | 1.50793400 | -2.98294800  | -1.59742800 |
| C  | 1.55831600  | 5.24351200  | -1.24636900 | H                                            | 3.64251500 | -2.84598200  | 1.82159200  |
| H  | 1.00805700  | 2.41499200  | -2.96922600 | H                                            | 2.73893800 | -5.07398100  | 1.37974900  |
| H  | -1.02292000 | 4.15705900  | -1.48957200 | H                                            | 1.27470900 | -4.39253900  | 0.66319800  |
| H  | 1.23994800  | 5.00685200  | -3.37114100 | H                                            | 4.11492400 | -4.13450700  | -0.48354400 |
| H  | 2.97083000  | 3.72782700  | -1.83926000 | H                                            | 2.77807600 | -5.01367300  | -1.22389500 |
| H  | 2.28181900  | 6.05795000  | -1.38524800 | P                                            | 2.33793200 | -1.61270700  | 0.16183300  |
| H  | -0.29037300 | 1.82412600  | -1.92936300 | C                                            | 3.84608000 | -0.53557100  | 0.16736300  |
| H  | -0.96156600 | 3.87858300  | -3.23282200 | C                                            | 3.70606500 | 0.85166500   | -0.08966300 |
| H  | 2.93865100  | 4.02150300  | -0.10834000 | C                                            | 5.13235300 | -1.06243100  | 0.37468500  |
| H  | 0.07893600  | 6.08548900  | -2.60494500 | C                                            | 4.86324600 | 1.64795400   | -0.15174900 |
| H  | 0.96254100  | 5.49674500  | -0.35857500 | C                                            | 6.26574100 | -0.25432200  | 0.32427600  |
| C  | 1.32593600  | 2.74460300  | -0.84815400 | H                                            | 5.25451800 | -2.12390500  | 0.56684100  |
| C  | 1.18102100  | 1.89559900  | 0.20078500  | C                                            | 6.13050300 | 1.10797400   | 0.05429200  |
| C  | 2.06595900  | 2.04545600  | 1.43577800  | H                                            | 4.77732800 | 2.70750700   | -0.36965300 |
| H  | 1.44830800  | 2.42246600  | 2.27001600  | H                                            | 7.24883300 | -0.68737400  | 0.48480900  |
| H  | 2.87548600  | 2.78379800  | 1.32798500  | H                                            | 7.00721200 | 1.74705700   | 0.00227800  |
| Si | 2.81914000  | 0.45950400  | 2.14835800  | C                                            | 1.66892900 | 2.92260500   | 0.84497500  |
| C  | 1.44576000  | -0.57448300 | 2.95997900  | C                                            | 2.27601300 | 2.72514700   | -1.87877400 |
|    |             |             |             | C                                            | 1.32594600 | 4.13960200   | -0.04976700 |

|    |             |             |             |                                              |             |              |             |
|----|-------------|-------------|-------------|----------------------------------------------|-------------|--------------|-------------|
| H  | 0.76591800  | 2.59284200  | 1.36894900  | H                                            | -2.08884500 | 1.92170100   | -1.23357200 |
| C  | 2.27477400  | 4.14266100  | -1.25847800 | Si                                           | -3.63615500 | 0.17818700   | -2.03258400 |
| H  | 3.24799300  | 2.49631000  | -2.32713000 | C                                            | -3.34739800 | -1.21247800  | -3.28125400 |
| H  | 0.29003100  | 4.05536200  | -0.39862500 | H                                            | -2.69552200 | -0.87342400  | -4.09486000 |
| H  | 1.39159900  | 5.07152300  | 0.52362100  | H                                            | -2.86147900 | -2.07351300  | -2.81728800 |
| H  | 1.97931300  | 4.89420900  | -2.00037900 | H                                            | -4.29741100 | -1.53521100  | -3.72189900 |
| H  | 3.28664400  | 4.40824000  | -0.92837400 | C                                            | -4.40126300 | 1.64711300   | -2.96595300 |
| P  | 2.01649900  | 1.55155800  | -0.41564000 | H                                            | -3.69645900 | 2.01998500   | -3.71850400 |
| C  | 3.37616600  | -2.36774600 | -2.44868200 | H                                            | -5.31927200 | 1.36280700   | -3.49187500 |
| H  | 2.96533800  | -1.45367400 | -2.88946800 | H                                            | -4.64123100 | 2.48381000   | -2.30021900 |
| H  | 4.41577100  | -2.16974900 | -2.16968600 | C                                            | -4.86750600 | -0.42319700  | -0.72078400 |
| H  | 3.37817500  | -3.13539900 | -3.23061400 | C                                            | -6.11802900 | 0.19990700   | -0.55176500 |
| C  | 1.69591500  | -2.69222400 | 2.74038200  | C                                            | -4.57903400 | -1.52926500  | 0.10422700  |
| H  | 1.87429600  | -3.48562500 | 3.47570400  | C                                            | -7.03969900 | -0.25087300  | 0.39638000  |
| H  | 1.89834400  | -1.73524900 | 3.23277700  | H                                            | -6.38331600 | 1.05520100   | -1.16808800 |
| H  | 0.64034200  | -2.71744100 | 2.45626400  | C                                            | -5.49468900 | -1.98221500  | 1.05583500  |
| C  | 2.75031800  | 3.21078500  | 1.89210700  | H                                            | -3.62423500 | -2.04027800  | 0.02390200  |
| H  | 3.03536200  | 2.30791800  | 2.43981800  | C                                            | -6.72809300 | -1.34399400  | 1.20558700  |
| H  | 3.65973900  | 3.63092500  | 1.45383900  | H                                            | -7.99790900 | 0.25155000   | 0.50309300  |
| H  | 2.36826100  | 3.93633400  | 2.61929800  | H                                            | -5.24268200 | -2.83458800  | 1.68138700  |
| C  | 1.18715800  | 2.53452400  | -2.94532500 | H                                            | -7.44096500 | -1.69731500  | 1.94622500  |
| H  | 1.35167800  | 3.22484900  | -3.78066100 | C                                            | -0.89245000 | -1.84757900  | -0.37266000 |
| H  | 1.19238800  | 1.51536500  | -3.34368100 | O                                            | -1.14529300 | -2.51104800  | 0.61202500  |
| H  | 0.18567200  | 2.72010500  | -2.54525000 | O                                            | -0.74456800 | -1.94957200  | -1.58335400 |
| Cu | 0.52497800  | -0.24385100 | -0.10690400 | <b>TS11A</b>                                 |             |              |             |
| C  | -1.41032900 | -0.05799200 | 2.48739000  | Sum of electronic and thermal Free Energies= |             | -4126.971639 |             |
| C  | -1.07400400 | 0.98835800  | 3.56861900  | C                                            | -0.15985300 | 3.14472700   | -0.59587200 |
| C  | -3.06853000 | 1.52839100  | 1.44464800  | C                                            | -1.77963200 | 2.86444400   | 1.62424600  |
| C  | -2.25076100 | 1.94080200  | 3.81868800  | C                                            | -0.73950500 | 4.00218200   | 1.65970500  |
| C  | -2.72206700 | 2.58951900  | 2.51083400  | C                                            | -0.45848500 | 4.42520100   | 0.21155400  |
| H  | -2.19666700 | -0.71978000 | 2.88411700  | H                                            | 0.84729900  | 2.80763100   | -0.31587400 |
| H  | -0.19879300 | 1.57402400  | 3.24966200  | H                                            | -2.74197600 | 3.29589800   | 1.32054300  |
| H  | -3.08381700 | 1.37406300  | 4.25856400  | H                                            | -1.10243600 | 4.83619500   | 2.27161400  |
| H  | -3.93828100 | 0.95510100  | 1.79787400  | H                                            | 0.18581300  | 3.64048100   | 2.12735300  |
| H  | -3.59384900 | 3.22986200  | 2.69503700  | H                                            | -1.33806600 | 4.93474900   | -0.20481800 |
| H  | -0.54842200 | -0.69773900 | 2.29050100  | H                                            | 0.37717300  | 5.13212700   | 0.14381600  |
| H  | -0.78690700 | 0.48419500  | 4.50034100  | P                                            | -1.22953500 | 1.78321000   | 0.17183600  |
| H  | -3.38459800 | 2.02136200  | 0.52224100  | C                                            | -2.78687600 | 1.60802000   | -0.82207500 |
| H  | -1.97455800 | 2.70955500  | 4.55158700  | C                                            | -3.32563700 | 0.31412500   | -1.03752800 |
| H  | -1.92774600 | 3.24524300  | 2.12501900  | C                                            | -3.45960100 | 2.72192700   | -1.35391500 |
| C  | -1.91813500 | 0.56510200  | 1.20088300  | C                                            | -4.49223000 | 0.18639900   | -1.81026600 |
| C  | -1.39389000 | 0.27352600  | -0.01555700 | C                                            | -4.61560300 | 2.57565700   | -2.11707900 |
| C  | -1.96952000 | 0.82948500  | -1.30929000 | H                                            | -3.07815200 | 3.72082200   | -1.16712500 |
| H  | -1.25534000 | 0.66225200  | -2.12539400 | C                                            | -5.12893200 | 1.29964400   | -2.35383600 |

|    |             |             |             |                                              |             |              |             |
|----|-------------|-------------|-------------|----------------------------------------------|-------------|--------------|-------------|
| H  | -4.91716800 | -0.79702000 | -1.98520000 | H                                            | 4.24698700  | -0.18962700  | 5.02548900  |
| H  | -5.11257400 | 3.45177300  | -2.52355900 | H                                            | 3.98428400  | -1.89676700  | 3.24502900  |
| H  | -6.02874500 | 1.17265000  | -2.94894600 | C                                            | 2.30029600  | -0.39541000  | 1.57434100  |
| C  | -3.50597600 | -1.65027000 | 1.23513500  | C                                            | 1.43651000  | -1.08622200  | 0.77429000  |
| C  | -2.94944000 | -2.64789800 | -1.31609000 | C                                            | 1.95155300  | -2.08335700  | -0.25386900 |
| C  | -3.75357700 | -3.15669600 | 0.98784000  | H                                            | 1.16690700  | -2.82779600  | -0.43237600 |
| H  | -2.84545500 | -1.52268400 | 2.09790900  | H                                            | 2.79765800  | -2.67304200  | 0.12923200  |
| C  | -4.05973300 | -3.35611300 | -0.50516500 | Si                                           | 2.45199100  | -1.44062900  | -1.97462500 |
| H  | -3.32325400 | -2.30670000 | -2.28690200 | C                                            | 0.96915900  | -0.62861900  | -2.83838300 |
| H  | -2.85209200 | -3.71561600 | 1.26141300  | H                                            | 0.25322700  | -1.38516900  | -3.17677200 |
| H  | -4.56783700 | -3.52323100 | 1.62402800  | H                                            | 0.43502900  | 0.03751600   | -2.15207800 |
| H  | -4.11752300 | -4.41887100 | -0.76888200 | H                                            | 1.27644800  | -0.04615800  | -3.71333600 |
| H  | -5.03682500 | -2.91625700 | -0.74172600 | C                                            | 3.01482700  | -2.93005500  | -3.00604500 |
| P  | -2.47216600 | -1.14325900 | -0.27585500 | H                                            | 2.20448300  | -3.66294000  | -3.09040200 |
| C  | -0.19331700 | 3.29847500  | -2.11785800 | H                                            | 3.30500700  | -2.63346200  | -4.01977100 |
| H  | 0.04783200  | 2.35847600  | -2.62291800 | H                                            | 3.86821800  | -3.44609400  | -2.55274700 |
| H  | -1.17153900 | 3.62573600  | -2.47912800 | C                                            | 3.86395500  | -0.17242800  | -1.92782400 |
| H  | 0.54548600  | 4.04377600  | -2.43397300 | C                                            | 5.21272700  | -0.57083100  | -1.98456100 |
| C  | -1.96865900 | 2.12765800  | 2.95140500  | C                                            | 3.60666200  | 1.20795000   | -1.83127500 |
| H  | -2.26621200 | 2.83515700  | 3.73429800  | C                                            | 6.25401000  | 0.35806100   | -1.93589000 |
| H  | -2.74917300 | 1.36440000  | 2.88131300  | H                                            | 5.46094500  | -1.62617100  | -2.06997000 |
| H  | -1.05336200 | 1.62599400  | 3.27463800  | C                                            | 4.64080000  | 2.14492300   | -1.78170800 |
| C  | -4.79327700 | -0.85330400 | 1.47063200  | H                                            | 2.57923200  | 1.56269200   | -1.79966800 |
| H  | -4.59601600 | 0.21681800  | 1.58499200  | C                                            | 5.97000800  | 1.72084200   | -1.83180700 |
| H  | -5.51448500 | -0.96556600 | 0.65517700  | H                                            | 7.28568900  | 0.01913200   | -1.98162900 |
| H  | -5.27351300 | -1.20325200 | 2.39173600  | H                                            | 4.41090900  | 3.20488600   | -1.70776600 |
| C  | -1.72447000 | -3.54835600 | -1.54530500 | H                                            | 6.77775400  | 2.44678800   | -1.79480800 |
| H  | -2.02208300 | -4.46043200 | -2.07573400 | C                                            | 0.01994700  | -1.99632500  | 1.90500500  |
| H  | -0.97008800 | -3.03864700 | -2.15087900 | O                                            | 0.03666400  | -3.15956900  | 1.56291100  |
| H  | -1.24760100 | -3.83375500 | -0.60301200 | O                                            | -0.48137200 | -1.26825700  | 2.75603100  |
| Cu | -0.41877900 | -0.34404200 | 0.40970800  | <b>11A</b>                                   |             |              |             |
| C  | 1.83809100  | 0.59952700  | 2.61951400  | Sum of electronic and thermal Free Energies= |             | -4127.029324 |             |
| C  | 2.36716400  | 0.26510500  | 4.02797700  | C                                            | -2.86952500 | 2.91439500   | -1.36905100 |
| C  | 3.81260000  | -0.53550900 | 1.56725200  | C                                            | -3.12567600 | 2.60754800   | 1.36709100  |
| C  | 3.89364700  | 0.11418400  | 4.03216600  | C                                            | -2.87709900 | 4.03775800   | 0.84109500  |
| C  | 4.34803000  | -0.89715800 | 2.97198400  | C                                            | -3.43030600 | 4.12033200   | -0.58872000 |
| H  | 2.22233900  | 1.59361400  | 2.33177600  | H                                            | -1.81315900 | 3.12255300   | -1.58463000 |
| H  | 1.89704100  | -0.66927900 | 4.35833400  | H                                            | -4.19750600 | 2.50026500   | 1.57753600  |
| H  | 4.35599300  | 1.08986700  | 3.82079000  | H                                            | -3.33361300 | 4.77953200   | 1.50678200  |
| H  | 4.25947900  | 0.42193100  | 1.26027000  | H                                            | -1.79773000 | 4.24042700   | 0.83005000  |
| H  | 5.44328800  | -0.95660500 | 2.94204400  | H                                            | -4.52792500 | 4.07630400   | -0.56704800 |
| H  | 0.75161600  | 0.65451300  | 2.63122600  | H                                            | -3.16220500 | 5.06421200   | -1.07886400 |
| H  | 2.05651300  | 1.04275400  | 4.73738700  | P                                            | -2.73741100 | 1.50669400   | -0.11348800 |
| H  | 4.15233000  | -1.27486800 | 0.84134900  | C                                            | -4.23832800 | 0.43060400   | -0.29962100 |

|    |             |             |             |                                              |             |              |             |
|----|-------------|-------------|-------------|----------------------------------------------|-------------|--------------|-------------|
| C  | -4.07243300 | -0.97718600 | -0.35114800 | H                                            | 4.87253600  | 4.70472700   | -0.79441900 |
| C  | -5.53318300 | 0.96688100  | -0.40260700 | H                                            | 5.36335700  | 2.14865900   | -0.31610500 |
| C  | -5.20769400 | -1.78418100 | -0.53891500 | H                                            | 5.99442500  | 3.93711200   | 1.27477100  |
| C  | -6.64742100 | 0.15016300  | -0.58255400 | H                                            | 1.66869800  | 2.63279400   | -0.85200700 |
| H  | -5.67497700 | 2.04186300  | -0.34417800 | H                                            | 2.41891400  | 5.02696500   | -0.89456100 |
| C  | -6.48168700 | -1.23314000 | -0.65918900 | H                                            | 5.23903500  | 1.56525600   | 1.33048200  |
| H  | -5.10022900 | -2.86345800 | -0.58848000 | H                                            | 4.36750300  | 5.72595000   | 0.54815400  |
| H  | -7.63697900 | 0.59049600  | -0.66525200 | H                                            | 4.44431800  | 3.79295700   | 2.09987000  |
| H  | -7.34121000 | -1.88145200 | -0.80402400 | C                                            | 3.34202600  | 1.90092000   | 0.31056400  |
| C  | -2.31946700 | -2.61871300 | 1.48637400  | C                                            | 2.69051000  | 0.85173200   | 0.86301600  |
| C  | -2.39585800 | -3.26903800 | -1.23125400 | C                                            | 3.28724800  | -0.12631800  | 1.85178800  |
| C  | -1.85817100 | -4.03959100 | 1.08434500  | H                                            | 2.54583100  | -0.30973700  | 2.63827500  |
| H  | -1.53192100 | -2.12174200 | 2.06186400  | H                                            | 4.18413000  | 0.26939400   | 2.33688200  |
| C  | -2.56370000 | -4.43207300 | -0.22525800 | Si                                           | 3.72952500  | -1.82791200  | 1.09576800  |
| H  | -3.25052700 | -3.21320000 | -1.91299800 | C                                            | 2.14595600  | -2.74815000  | 0.60964600  |
| H  | -0.77332900 | -4.04014600 | 0.92883200  | H                                            | 1.48915200  | -2.86740900  | 1.47819100  |
| H  | -2.06416500 | -4.75613400 | 1.88830300  | H                                            | 1.58919600  | -2.19476600  | -0.15298400 |
| H  | -2.16216400 | -5.36728500 | -0.63380400 | H                                            | 2.38060600  | -3.74183300  | 0.21172500  |
| H  | -3.62878800 | -4.60618700 | -0.02745400 | C                                            | 4.65755200  | -2.83658700  | 2.40517600  |
| P  | -2.36613000 | -1.70210700 | -0.17368000 | H                                            | 4.02777000  | -2.97671400  | 3.29102500  |
| C  | -3.56024600 | 2.59758400  | -2.69593300 | H                                            | 4.93041300  | -3.83061900  | 2.03422300  |
| H  | -3.09642000 | 1.73892900  | -3.19197700 | H                                            | 5.57624300  | -2.33809800  | 2.73341400  |
| H  | -4.62190300 | 2.37153500  | -2.56391500 | C                                            | 4.80943700  | -1.61458000  | -0.44537700 |
| H  | -3.48182900 | 3.45392600  | -3.37545500 | C                                            | 6.14590800  | -2.05179400  | -0.48635700 |
| C  | -2.32680800 | 2.24278500  | 2.62156200  | C                                            | 4.28736200  | -1.00586000  | -1.60609800 |
| H  | -2.50396200 | 2.97748700  | 3.41601900  | C                                            | 6.93292900  | -1.89118900  | -1.62941100 |
| H  | -2.62080600 | 1.26124700  | 3.00725600  | H                                            | 6.58579000  | -2.52839000  | 0.38650500  |
| H  | -1.25263800 | 2.19786500  | 2.41843600  | C                                            | 5.07035100  | -0.84243300  | -2.75009400 |
| C  | -3.60709500 | -2.60642400 | 2.31681200  | H                                            | 3.26198100  | -0.64437200  | -1.61669100 |
| H  | -3.94475300 | -1.58718900 | 2.52622300  | C                                            | 6.39533200  | -1.28481500  | -2.76507500 |
| H  | -4.43030700 | -3.12858300 | 1.82081600  | H                                            | 7.96274200  | -2.23932500  | -1.63262500 |
| H  | -3.42789800 | -3.10312200 | 3.27745400  | H                                            | 4.64531500  | -0.36910600  | -3.63149700 |
| C  | -1.11130300 | -3.37968000 | -2.06643100 | H                                            | 7.00386300  | -1.15806000  | -3.65673400 |
| H  | -1.13782600 | -4.28272600 | -2.68747300 | C                                            | 1.25375200  | 0.53119100   | 0.53246500  |
| H  | -0.98999100 | -2.51608700 | -2.72722200 | O                                            | 0.85832900  | 0.54425400   | -0.68648500 |
| H  | -0.21885700 | -3.43257700 | -1.43478100 | O                                            | 0.46872600  | 0.20280700   | 1.46860600  |
| Cu | -1.06112500 | 0.07453200  | -0.14959000 | <b>TS12A</b>                                 |             |              |             |
| C  | 2.70978400  | 2.88546500  | -0.65565200 | Sum of electronic and thermal Free Energies= |             | -4981.817363 |             |
| C  | 2.84235300  | 4.33849300  | -0.15212800 | C                                            | 0.87175900  | -3.53367100  | 0.70135800  |
| C  | 4.78526800  | 2.25367700  | 0.61513800  | C                                            | 1.84545200  | -2.87920800  | 3.20009000  |
| C  | 4.30164600  | 4.70731200  | 0.14549900  | C                                            | 0.73394900  | -3.95188400  | 3.13161300  |
| C  | 4.93331600  | 3.70492800  | 1.12001300  | C                                            | 0.80810000  | -4.64228300  | 1.76507800  |
| H  | 3.23418300  | 2.80700400  | -1.62144500 | H                                            | -0.11027000 | -3.04939500  | 0.63153000  |
| H  | 2.24519000  | 4.45481200  | 0.76317300  | H                                            | 2.79412000  | -3.36834100  | 3.44222900  |

|    |             |             |             |    |             |             |             |
|----|-------------|-------------|-------------|----|-------------|-------------|-------------|
| H  | 0.82316800  | -4.66047100 | 3.96402100  | O  | -0.56326100 | -0.90794600 | -0.69833100 |
| H  | -0.24461000 | -3.46402200 | 3.23605500  | O  | -1.51574500 | 1.06343100  | -0.14504200 |
| H  | 1.70793100  | -5.27003000 | 1.70602000  | B  | -0.06902400 | 2.53885800  | -0.59010500 |
| H  | -0.05018200 | -5.30464800 | 1.59403000  | O  | 0.73696200  | 1.80440300  | -1.49338900 |
| P  | 1.95994100  | -2.16011200 | 1.43720900  | O  | -0.89746200 | 3.41558100  | -1.28087000 |
| C  | 3.67684400  | -2.62736500 | 0.86051700  | C  | 0.09211800  | 1.88218500  | -2.77763300 |
| C  | 4.30906500  | -1.85762700 | -0.15108200 | C  | -0.83759800 | 3.10975300  | -2.67594000 |
| C  | 4.38954600  | -3.70959000 | 1.40612000  | H  | -0.43908600 | 3.97782800  | -3.21606800 |
| C  | 5.61998700  | -2.18315100 | -0.54069400 | H  | -1.84219000 | 2.89896700  | -3.05804700 |
| C  | 5.68559000  | -4.02476600 | 1.00194000  | H  | 0.85107800  | 1.99123400  | -3.55858000 |
| H  | 3.92714700  | -4.33207200 | 2.16365600  | H  | -0.46533100 | 0.95499800  | -2.95501500 |
| C  | 6.31052100  | -3.25100600 | 0.02707300  | C  | -2.55003800 | -2.58627100 | -2.04701400 |
| H  | 6.12006800  | -1.59262400 | -1.30139000 | C  | -2.51825300 | -4.10814000 | -1.78722700 |
| H  | 6.20101200  | -4.87057500 | 1.44826000  | C  | -4.76418400 | -2.42326900 | -0.88713600 |
| H  | 7.32366400  | -3.47546000 | -0.29347400 | C  | -3.93027800 | -4.69591900 | -1.66642500 |
| C  | 4.24937800  | 1.15759000  | -0.47819600 | C  | -4.75119200 | -3.94287900 | -0.61213300 |
| C  | 4.13058200  | -0.45069500 | -2.76110900 | H  | -3.04290500 | -2.42112200 | -3.01922500 |
| C  | 4.43363200  | 1.86383700  | -1.84059700 | H  | -1.96570200 | -4.29643600 | -0.85691600 |
| H  | 3.51405700  | 1.70404600  | 0.11728200  | H  | -4.43700200 | -4.61885900 | -2.63937400 |
| C  | 4.98927500  | 0.83806700  | -2.84339500 | H  | -5.27164600 | -2.25708300 | -1.85082500 |
| H  | 4.75168000  | -1.34042100 | -2.89307500 | H  | -5.78025800 | -4.32109200 | -0.58292600 |
| H  | 3.46058300  | 2.23527000  | -2.18192500 | H  | -1.53902900 | -2.19212800 | -2.11369800 |
| H  | 5.08906200  | 2.73539000  | -1.73551600 | H  | -1.96377300 | -4.60806500 | -2.59130800 |
| H  | 4.99506700  | 1.23535400  | -3.86508600 | H  | -5.36865300 | -1.91413900 | -0.13534600 |
| H  | 6.03146200  | 0.60795200  | -2.59077500 | H  | -3.88255400 | -5.76472000 | -1.42311700 |
| P  | 3.43353400  | -0.46062700 | -1.00011300 | H  | -4.32072700 | -4.12104600 | 0.38284400  |
| C  | 1.26011200  | -3.99263900 | -0.70369900 | C  | -3.35698600 | -1.86101300 | -0.98727800 |
| H  | 1.25835800  | -3.14006400 | -1.38969000 | C  | -2.92936100 | -0.81895700 | -0.23122700 |
| H  | 2.25400800  | -4.45054400 | -0.72506500 | C  | -3.82214700 | -0.09126500 | 0.76087400  |
| H  | 0.53815200  | -4.72478700 | -1.08176400 | H  | -3.19535400 | 0.37356500  | 1.52733700  |
| C  | 1.58493700  | -1.79735000 | 4.25451500  | H  | -4.48014600 | -0.79678400 | 1.27622700  |
| H  | 1.46785100  | -2.24733300 | 5.24795400  | Si | -4.90746400 | 1.31068700  | 0.00792900  |
| H  | 2.41023800  | -1.08053400 | 4.30886400  | C  | -4.69298200 | 1.42633900  | -1.86699700 |
| H  | 0.67415500  | -1.23268400 | 4.03067400  | H  | -3.63454600 | 1.59676600  | -2.08588000 |
| C  | 5.53985800  | 1.05250400  | 0.34144400  | H  | -5.00370500 | 0.51461700  | -2.38665800 |
| H  | 5.38890100  | 0.47561000  | 1.25812000  | H  | -5.26163200 | 2.26624800  | -2.28116700 |
| H  | 6.35742500  | 0.58119100  | -0.21207100 | C  | -4.44690400 | 2.97229900  | 0.78047600  |
| H  | 5.86023500  | 2.05974400  | 0.62800300  | H  | -3.42630500 | 3.23651100  | 0.48739700  |
| C  | 3.01817300  | -0.49770600 | -3.81707500 | H  | -5.12025300 | 3.76895100  | 0.44595000  |
| H  | 3.45435600  | -0.50696400 | -4.82273300 | H  | -4.49301300 | 2.93689200  | 1.87475100  |
| H  | 2.39979600  | -1.39491900 | -3.71318400 | C  | -6.72554600 | 0.91712700  | 0.40861400  |
| H  | 2.35820500  | 0.37129200  | -3.74752800 | C  | -7.11435000 | 0.57464300  | 1.71872200  |
| Cu | 1.28206100  | -0.42438400 | -0.75348900 | C  | -7.73727200 | 0.96689300  | -0.56750100 |
| C  | -1.56603200 | -0.17586900 | -0.37492200 | C  | -8.44364600 | 0.29751000  | 2.04065400  |

|                                              |              |            |             |    |             |             |             |
|----------------------------------------------|--------------|------------|-------------|----|-------------|-------------|-------------|
| H                                            | -6.36621800  | 0.52092700 | 2.50787300  | C  | -6.23662300 | 3.50228500  | 0.21993600  |
| C                                            | -9.07086100  | 0.69069100 | -0.25535500 | H  | -4.69521200 | 4.04045000  | 1.58704000  |
| H                                            | -7.48375500  | 1.22290000 | -1.59332400 | C  | -6.64814100 | 2.61748300  | -0.77343900 |
| C                                            | -9.42756900  | 0.35469500 | 1.05106000  | H  | -6.12834400 | 0.91220800  | -1.94461100 |
| H                                            | -8.71247000  | 0.03645900 | 3.06105700  | H  | -6.88111000 | 4.31925300  | 0.53210800  |
| H                                            | -9.82998100  | 0.73584300 | -1.03213900 | H  | -7.62210600 | 2.72389000  | -1.24209800 |
| H                                            | -10.46365600 | 0.13798400 | 1.29711400  | C  | -4.11807600 | -1.58779000 | -0.66799500 |
| Si                                           | 0.47008300   | 3.05100300 | 1.30275600  | C  | -3.85498600 | -0.13652700 | -3.03915900 |
| C                                            | -0.78129200  | 4.29048700 | 2.01351600  | C  | -3.93899200 | -2.41376100 | -1.96119400 |
| H                                            | -0.46600600  | 4.64703300 | 3.00057400  | H  | -3.45258100 | -1.97507100 | 0.10758000  |
| H                                            | -0.88877700  | 5.16011600 | 1.35753000  | C  | -4.43972900 | -1.57158300 | -3.14856100 |
| H                                            | -1.76955400  | 3.83118600 | 2.11640100  | H  | -4.61384300 | 0.60421800  | -3.30328700 |
| C                                            | 0.60678300   | 1.59530400 | 2.50968200  | H  | -2.87526700 | -2.64543000 | -2.08162100 |
| H                                            | -0.36248000  | 1.08945000 | 2.56739900  | H  | -4.46883700 | -3.36975300 | -1.88386600 |
| H                                            | 1.34139500   | 0.84831100 | 2.19383400  | H  | -4.16574800 | -2.02760400 | -4.10679300 |
| H                                            | 0.87194000   | 1.92824300 | 3.51995200  | H  | -5.53486400 | -1.52377500 | -3.12645400 |
| C                                            | 2.15973800   | 3.93969000 | 1.21755100  | P  | -3.41476100 | 0.07198200  | -1.21013900 |
| C                                            | 3.15433500   | 3.77966500 | 2.20027600  | C  | -1.59907500 | 3.72422100  | -0.87802300 |
| C                                            | 2.44309700   | 4.82396400 | 0.15742600  | H  | -1.42525800 | 2.81107200  | -1.45616200 |
| C                                            | 4.37003600   | 4.46682600 | 2.13314600  | H  | -2.61049700 | 4.08021800  | -1.09688100 |
| H                                            | 2.98111300   | 3.10783500 | 3.03770000  | H  | -0.88808300 | 4.48256400  | -1.22287100 |
| C                                            | 3.65313300   | 5.51616700 | 0.08217700  | C  | -2.44691500 | 1.91187800  | 4.16370300  |
| H                                            | 1.70073000   | 4.97753200 | -0.62330900 | H  | -2.52665700 | 2.44593800  | 5.11848400  |
| C                                            | 4.62313200   | 5.33792100 | 1.07186100  | H  | -3.18408300 | 1.10269400  | 4.17331700  |
| H                                            | 5.11636700   | 4.32594200 | 2.91118400  | H  | -1.45464500 | 1.45255700  | 4.11675700  |
| H                                            | 3.83967300   | 6.19526300 | -0.74610400 | C  | -5.54910200 | -1.59401600 | -0.12211700 |
| H                                            | 5.56554700   | 5.87662700 | 1.01831100  | H  | -5.65372600 | -0.93189200 | 0.74179300  |
| <b>12A</b>                                   |              |            |             | H  | -6.28995600 | -1.28526300 | -0.86624200 |
| Sum of electronic and thermal Free Energies= | -4981.823008 |            |             | H  | -5.79944500 | -2.60928200 | 0.20318800  |
| C                                            | -1.40559100  | 3.43782100 | 0.61062900  | C  | -2.64245200 | 0.10357400  | -3.94947100 |
| C                                            | -2.67719700  | 2.87223000 | 2.99073100  | H  | -2.93036600 | -0.01437400 | -5.00058600 |
| C                                            | -1.69734600  | 4.06978500 | 2.97855200  | H  | -2.24274300 | 1.11556900  | -3.82635400 |
| C                                            | -1.62778100  | 4.63121000 | 1.55361600  | H  | -1.83321300 | -0.60177300 | -3.74307800 |
| H                                            | -0.38324900  | 3.06424600 | 0.74997200  | Cu | -1.30024600 | 0.18039000  | -0.71855100 |
| H                                            | -3.70027800  | 3.25339600 | 3.06366600  | C  | 1.59186700  | 0.21341000  | -0.24855200 |
| H                                            | -1.99751100  | 4.82766100 | 3.71222500  | O  | 0.49952300  | 0.83810600  | -0.34176400 |
| H                                            | -0.69925000  | 3.72102500 | 3.27632100  | O  | 1.70810700  | -1.07181500 | -0.28054900 |
| H                                            | -2.56815200  | 5.13763900 | 1.29751800  | B  | 0.58635800  | -2.20105900 | -0.28665900 |
| H                                            | -0.82892900  | 5.37638900 | 1.44599000  | O  | -0.43589800 | -1.82974900 | -1.28299200 |
| P                                            | -2.46830600  | 2.01991600 | 1.29643000  | O  | 1.24526900  | -3.37530700 | -0.81735500 |
| C                                            | -4.11450600  | 2.29698600 | 0.45054600  | C  | 0.07180800  | -2.28708700 | -2.54116900 |
| C                                            | -4.52573300  | 1.41764100 | -0.58496300 | C  | 0.89208600  | -3.53879800 | -2.18080000 |
| C                                            | -4.98876000  | 3.33512400 | 0.81796100  | H  | 0.29263900  | -4.45327900 | -2.30612600 |
| C                                            | -5.79311600  | 1.59120300 | -1.16767600 | H  | 1.78604100  | -3.63473600 | -2.81118400 |

|    |             |             |             |                                              |             |             |             |
|----|-------------|-------------|-------------|----------------------------------------------|-------------|-------------|-------------|
| H  | -0.76059000 | -2.50552100 | -3.21913200 | H                                            | 0.99601700  | -3.95626900 | 3.50879700  |
| H  | 0.70302700  | -1.51449200 | -3.00581500 | H                                            | 1.49154800  | -4.56265400 | 1.91508100  |
| C  | 2.27647700  | 2.92257900  | -1.51253800 | H                                            | 2.25940300  | -3.12287700 | 2.58558200  |
| C  | 2.14854500  | 4.37369100  | -0.99912000 | C                                            | -0.24830800 | -1.04487600 | 2.77940900  |
| C  | 4.56575100  | 2.75756500  | -0.50748300 | H                                            | 0.65642200  | -0.42541200 | 2.77466600  |
| C  | 3.51787900  | 5.04901500  | -0.84643500 | H                                            | -1.07801400 | -0.41033900 | 2.45401800  |
| C  | 4.45511000  | 4.20331700  | 0.02407700  | H                                            | -0.43336400 | -1.34034900 | 3.81927000  |
| H  | 2.71920700  | 2.96143700  | -2.52086900 | C                                            | -1.63860600 | -3.55844400 | 1.65547500  |
| H  | 1.63691000  | 4.36346400  | -0.02742700 | C                                            | -2.70761000 | -3.28450000 | 2.52867400  |
| H  | 3.96918100  | 5.17969000  | -1.84056400 | C                                            | -1.80218900 | -4.63407700 | 0.75889000  |
| H  | 5.02058300  | 2.79586700  | -1.50978300 | C                                            | -3.88102800 | -4.04532100 | 2.51490700  |
| H  | 5.45310300  | 4.65530100  | 0.06780800  | H                                            | -2.62612200 | -2.46375000 | 3.23741200  |
| H  | 1.29438000  | 2.46384400  | -1.59985500 | C                                            | -2.96944800 | -5.39920100 | 0.73765300  |
| H  | 1.51539500  | 4.94960900  | -1.68495900 | H                                            | -0.99652100 | -4.87508700 | 0.06927400  |
| H  | 5.25143700  | 2.18172000  | 0.11482900  | C                                            | -4.01531000 | -5.10633200 | 1.61757800  |
| H  | 3.40345900  | 6.05375000  | -0.42144100 | H                                            | -4.68690000 | -3.81267500 | 3.20696700  |
| H  | 4.07477800  | 4.17633900  | 1.05410300  | H                                            | -3.06390900 | -6.22664000 | 0.03844400  |
| C  | 3.20202000  | 2.10439900  | -0.63478800 | H                                            | -4.92335400 | -5.70384600 | 1.60753500  |
| C  | 2.90643100  | 0.91398500  | -0.05382300 |                                              |             |             |             |
| C  | 3.90740700  | 0.09990300  | 0.74981200  | <b>TS13A</b>                                 |             |             |             |
| H  | 3.36961800  | -0.51574700 | 1.47703700  | Sum of electronic and thermal Free Energies= |             |             |             |
| H  | 4.55726300  | 0.76185300  | 1.32816100  |                                              |             |             |             |
| Si | 5.02489600  | -1.10265700 | -0.26996400 | C                                            | -1.59758100 | -3.61143900 | -0.29554700 |
| C  | 4.67292900  | -0.97059200 | -2.12242600 | C                                            | -2.13565500 | -2.94114900 | -2.90593900 |
| H  | 3.62540900  | -1.22784800 | -2.30505900 | C                                            | -1.59927600 | -4.37340300 | -2.63955300 |
| H  | 4.84705600  | 0.03576700  | -2.51640700 | C                                            | -1.94782200 | -4.79391300 | -1.21099100 |
| H  | 5.29417900  | -1.67026100 | -2.69230500 | H                                            | -0.50971100 | -3.47221700 | -0.29115000 |
| C  | 4.74183200  | -2.88000300 | 0.29968700  | H                                            | -3.15492400 | -2.99762800 | -3.29997400 |
| H  | 3.72226800  | -3.19471200 | 0.05237800  | H                                            | -1.98222700 | -5.07601700 | -3.38898300 |
| H  | 5.44436400  | -3.56373600 | -0.18994000 | H                                            | -0.50670000 | -4.36300200 | -2.74844500 |
| H  | 4.88079500  | -2.98638100 | 1.38154700  | H                                            | -3.01828000 | -5.02171900 | -1.12404000 |
| C  | 6.83350900  | -0.61421600 | 0.06000100  | H                                            | -1.40536100 | -5.69919200 | -0.90973500 |
| C  | 7.31881500  | -0.51021800 | 1.37872700  | P                                            | -2.21018600 | -2.06883400 | -1.20918500 |
| C  | 7.74511300  | -0.35880600 | -0.98043300 | C                                            | -4.01541500 | -2.04529900 | -0.73575800 |
| C  | 8.64535100  | -0.17061900 | 1.64718600  | C                                            | -4.44324900 | -1.20226700 | 0.32767900  |
| H  | 6.65078600  | -0.69955900 | 2.21733800  | C                                            | -4.96425200 | -2.88526200 | -1.34447500 |
| C  | 9.07523800  | -0.01794800 | -0.72179100 | C                                            | -5.77830000 | -1.28578700 | 0.76022500  |
| H  | 7.41555900  | -0.42500000 | -2.01434600 | C                                            | -6.29210900 | -2.92419900 | -0.92349100 |
| C  | 9.52897900  | 0.07697000  | 0.59414200  | H                                            | -4.66837700 | -3.53675900 | -2.15890700 |
| H  | 8.99052000  | -0.09991000 | 2.67546900  | C                                            | -6.70021700 | -2.12958400 | 0.14558800  |
| H  | 9.75594400  | 0.17380500  | -1.54732700 | H                                            | -6.10665200 | -0.68384900 | 1.59911000  |
| H  | 10.56283600 | 0.34173400  | 0.79893900  | H                                            | -6.99720900 | -3.58525700 | -1.41950900 |
| Si | -0.00727000 | -2.56510400 | 1.65672200  | H                                            | -7.72600400 | -2.16522600 | 0.50093400  |
| C  | 1.30633600  | -3.65749300 | 2.50113600  | C                                            | -4.00522700 | 1.63178800  | 1.44484600  |
|    |             |             |             | C                                            | -3.31958200 | -0.59705400 | 2.98172800  |
|    |             |             |             | C                                            | -3.98889400 | 1.80336900  | 2.98450100  |

|    |             |             |             |    |             |             |             |
|----|-------------|-------------|-------------|----|-------------|-------------|-------------|
| H  | -3.28336000 | 2.32272000  | 1.00178100  | H  | 4.03672500  | -5.29364000 | 1.82353700  |
| C  | -4.26229100 | 0.43928800  | 3.63441500  | H  | 5.03841500  | -2.86661200 | 1.55192200  |
| H  | -3.75882400 | -1.59889400 | 3.01880300  | H  | 5.55282800  | -4.69884700 | -0.03639600 |
| H  | -3.00260200 | 2.16196200  | 3.29810700  | H  | 1.31378700  | -2.63653900 | 1.59032600  |
| H  | -4.71798700 | 2.55965800  | 3.29799300  | H  | 1.58067200  | -5.11849200 | 1.61728700  |
| H  | -4.11351400 | 0.47209500  | 4.72070600  | H  | 5.28760700  | -2.22680500 | -0.06108100 |
| H  | -5.30887400 | 0.15517400  | 3.46958900  | H  | 3.52625800  | -6.15348000 | 0.37523300  |
| P  | -3.22106400 | -0.07559500 | 1.16064000  | H  | 4.18834400  | -4.23863600 | -1.05045000 |
| C  | -2.06764400 | -3.78295700 | 1.14754000  | C  | 3.21936800  | -2.22274600 | 0.63988600  |
| H  | -1.77484400 | -2.93452500 | 1.77008200  | C  | 2.88015100  | -1.05638400 | 0.03448600  |
| H  | -3.15473700 | -3.89543000 | 1.20712300  | C  | 3.84483100  | -0.20012300 | -0.76766600 |
| H  | -1.61539200 | -4.68173700 | 1.58303000  | H  | 3.28919000  | 0.33171000  | -1.54637000 |
| C  | -1.27052100 | -2.20133600 | -3.93550400 | H  | 4.57217900  | -0.83119200 | -1.28466100 |
| H  | -1.12197900 | -2.83267200 | -4.81980100 | Si | 4.81706900  | 1.14003300  | 0.22723600  |
| H  | -1.73106800 | -1.26989300 | -4.27203600 | C  | 4.40026600  | 1.06986800  | 2.06884000  |
| H  | -0.28200100 | -1.96038600 | -3.52931500 | H  | 3.33281500  | 1.26447000  | 2.20720400  |
| C  | -5.37184900 | 1.92694500  | 0.81343900  | H  | 4.62080900  | 0.09127500  | 2.50733500  |
| H  | -5.42021300 | 1.62083100  | -0.23572100 | H  | 4.95793300  | 1.82680200  | 2.63119200  |
| H  | -6.19463000 | 1.43471800  | 1.33871500  | C  | 4.41704700  | 2.85065900  | -0.46618800 |
| H  | -5.55844200 | 3.00589900  | 0.85459200  | H  | 3.35229700  | 3.06866100  | -0.33001300 |
| C  | -1.93647000 | -0.62887500 | 3.64909700  | H  | 5.00028000  | 3.62805000  | 0.03983300  |
| H  | -2.03653500 | -0.91783700 | 4.70213900  | H  | 4.64566500  | 2.91317500  | -1.53625700 |
| H  | -1.26825200 | -1.34461200 | 3.16279500  | C  | 6.67147000  | 0.78598800  | -0.00441200 |
| H  | -1.43801300 | 0.34098700  | 3.59595600  | C  | 7.23228200  | 0.72609000  | -1.29571500 |
| Cu | -1.33782300 | -0.03304700 | -0.08179500 | C  | 7.54017100  | 0.57848700  | 1.08217600  |
| C  | 1.51638700  | -0.45520700 | 0.17740000  | C  | 8.58979100  | 0.47203400  | -1.49426400 |
| O  | 0.46228000  | -1.11181100 | 0.27804800  | H  | 6.59975600  | 0.88292600  | -2.16794100 |
| O  | 1.52714900  | 0.85233200  | 0.14319000  | C  | 8.90115200  | 0.32384600  | 0.89357700  |
| B  | 0.32830300  | 1.73612700  | 0.39917700  | H  | 7.15199300  | 0.61494500  | 2.09694200  |
| O  | -0.26023900 | 1.56984100  | 1.70808400  | C  | 9.42948500  | 0.26943400  | -0.39648100 |
| O  | 0.84977600  | 3.07679900  | 0.31682400  | H  | 8.99345200  | 0.43327300  | -2.50275500 |
| C  | 0.19211900  | 2.66588900  | 2.50755200  | H  | 9.54753400  | 0.16758800  | 1.75345100  |
| C  | 0.44398100  | 3.77783100  | 1.48581100  | H  | 10.48735600 | 0.07142100  | -0.54681600 |
| H  | -0.47005300 | 4.35464000  | 1.28941500  | Si | -0.92546700 | 1.98795400  | -1.53893800 |
| H  | 1.23559400  | 4.47167100  | 1.79028500  | C  | 0.52892200  | 2.00597700  | -2.76858400 |
| H  | -0.57026700 | 2.92392800  | 3.25193300  | H  | 0.25022600  | 2.48864500  | -3.71231600 |
| H  | 1.11715400  | 2.39552000  | 3.03943000  | H  | 1.39871200  | 2.52592800  | -2.35924500 |
| C  | 2.30596900  | -3.07250600 | 1.50053100  | H  | 0.83419100  | 0.97767000  | -2.99720300 |
| C  | 2.21651100  | -4.51558100 | 0.95742400  | C  | -2.35550200 | 1.21758700  | -2.58652800 |
| C  | 4.60548900  | -2.82907600 | 0.54032700  | H  | -2.05195600 | 0.26781500  | -3.02530600 |
| C  | 3.60541400  | -5.15466700 | 0.82177900  | H  | -3.29407500 | 1.04910400  | -2.04966800 |
| C  | 4.54332600  | -4.27154000 | -0.01159200 | H  | -2.57149000 | 1.91417700  | -3.40663900 |
| H  | 2.74483700  | -3.12005100 | 2.50986900  | C  | -1.57410900 | 3.78286500  | -1.36007000 |
| H  | 1.72615800  | -4.49593000 | -0.02532500 | C  | -0.72290300 | 4.90045900  | -1.46548200 |



|                                              |              |             |             |                                              |             |             |             |
|----------------------------------------------|--------------|-------------|-------------|----------------------------------------------|-------------|-------------|-------------|
| C                                            | -2.94816000  | 4.04847200  | -1.21094700 | H                                            | -1.72244000 | -2.82519800 | 0.44226500  |
| C                                            | -1.21389200  | 6.20619200  | -1.40601000 | H                                            | -1.05215200 | -2.10104000 | -1.01468100 |
| H                                            | 0.34460600   | 4.74463500  | -1.57998000 | C                                            | 0.93128200  | -3.08772400 | 2.38960600  |
| C                                            | -3.44939100  | 5.35117200  | -1.13974800 | H                                            | 0.02713300  | -3.19703900 | 2.99873000  |
| H                                            | -3.65245500  | 3.22274400  | -1.16524700 | H                                            | 1.24317800  | -4.09100200 | 2.08034600  |
| C                                            | -2.58064000  | 6.43821500  | -1.23610400 | H                                            | 1.71405800  | -2.67901000 | 3.03754800  |
| H                                            | -0.52776400  | 7.04517800  | -1.49390200 | C                                            | -0.10028600 | 0.81287100  | 0.49475500  |
| H                                            | -4.51789500  | 5.51535300  | -1.02134000 | C                                            | -1.39340600 | 0.74348600  | -0.25043900 |
| H                                            | -2.96383800  | 7.45417800  | -1.18788500 | O                                            | -1.56195500 | 0.92739400  | -1.43828000 |
| <b>P<sub>0-2</sub></b>                       |              |             |             | O                                            | -2.45025400 | 0.43846200  | 0.57294500  |
| Sum of electronic and thermal Free Energies= | -1355.368192 |             |             | B                                            | -3.67975300 | 0.05387200  | 0.06562500  |
| C                                            | 0.63725100   | 2.82681200  | -0.88866400 | O                                            | -3.86269800 | -0.96838000 | -0.82552800 |
| C                                            | 0.89464200   | 4.23616600  | -0.31211400 | O                                            | -4.83645300 | 0.62533200  | 0.52401300  |
| C                                            | 2.17708900   | 1.84793000  | 0.84074600  | C                                            | -5.26767100 | -1.02462000 | -1.11576700 |
| C                                            | 2.26712100   | 4.34295000  | 0.36157200  | C                                            | -5.92609900 | -0.11947700 | -0.04285200 |
| C                                            | 2.43535900   | 3.25265900  | 1.42550600  | H                                            | -6.65972900 | 0.57384900  | -0.46340500 |
| H                                            | 1.36489800   | 2.64269200  | -1.69406700 | H                                            | -6.40923100 | -0.69983700 | 0.75144100  |
| H                                            | 0.11045800   | 4.46900800  | 0.42101900  | H                                            | -5.43348400 | -0.65096400 | -2.13225100 |
| H                                            | 3.05466000   | 4.23252600  | -0.39756900 | H                                            | -5.60838900 | -2.06255600 | -1.06471300 |
| H                                            | 2.94373300   | 1.63927400  | 0.07968500  | <b>P2</b>                                    |             |             |             |
| H                                            | 3.44179600   | 3.28714600  | 1.85909100  | Sum of electronic and thermal Free Energies= | -952.697643 |             |             |
| H                                            | -0.34688600  | 2.77894800  | -1.34968500 | C                                            | 3.02973900  | -0.11923200 | 1.08496300  |
| H                                            | 0.80142100   | 4.97594100  | -1.11589700 | C                                            | 4.31644900  | 0.24798200  | 0.31506400  |
| H                                            | 2.30973100   | 1.09158500  | 1.61498400  | C                                            | 1.62760600  | 0.83674800  | -0.75816000 |
| H                                            | 2.39935000   | 5.33606100  | 0.80749700  | C                                            | 4.09254200  | 1.44864200  | -0.61316400 |
| H                                            | 1.73051900   | 3.43311600  | 2.24831000  | C                                            | 2.90014600  | 1.20991700  | -1.54858100 |
| C                                            | 0.82628200   | 1.74788600  | 0.16050700  | H                                            | 2.77663100  | 0.72509200  | 1.74589000  |
| C                                            | 0.07693800   | -0.24891900 | 1.56213000  | H                                            | 4.63409100  | -0.61905700 | -0.27977400 |
| H                                            | 0.82095400   | 0.05371300  | 2.30345900  | H                                            | 3.89828500  | 2.34322800  | -0.00385800 |
| H                                            | -0.86432100  | -0.37597500 | 2.10674700  | H                                            | 1.34286700  | 1.69646600  | -0.13332600 |
| Si                                           | 0.59036900   | -1.97597600 | 0.89532400  | H                                            | 2.70995100  | 2.10082600  | -2.15960000 |
| C                                            | 2.14859400   | -1.81574500 | -0.16779200 | H                                            | 3.22772900  | -0.97183900 | 1.73691500  |
| C                                            | 2.08814000   | -1.22505900 | -1.44604700 | H                                            | 5.12622500  | 0.45910400  | 1.02441500  |
| C                                            | 3.40376000   | -2.26727400 | 0.27830900  | H                                            | 0.79477700  | 0.68202900  | -1.44588300 |
| C                                            | 3.22966200   | -1.08765400 | -2.23670000 | H                                            | 4.99962900  | 1.65780200  | -1.19334800 |
| H                                            | 1.13928300   | -0.86016100 | -1.83094600 | H                                            | 3.14116500  | 0.39401700  | -2.24357800 |
| C                                            | 4.54959500   | -2.13475200 | -0.50888500 | C                                            | 1.86398500  | -0.36271400 | 0.14254300  |
| H                                            | 3.49398600   | -2.73458500 | 1.25574100  | C                                            | 1.15321800  | -1.51097900 | 0.07844400  |
| C                                            | 4.46450900   | -1.54235600 | -1.76893700 | C                                            | 0.00392700  | -1.74166400 | -0.88754800 |
| H                                            | 3.15516100   | -0.62933200 | -3.21914700 | H                                            | 0.12883900  | -1.17203300 | -1.81446100 |
| H                                            | 5.50603100   | -2.49474700 | -0.13937700 | H                                            | -0.00049900 | -2.79848500 | -1.19212900 |
| H                                            | 5.35354600   | -1.43815800 | -2.38481400 | Si                                           | -1.76886200 | -1.36414500 | -0.26313400 |
| C                                            | -0.80428400  | -2.71615800 | -0.14447800 | C                                            | -1.98050500 | 0.48058600  | 0.11042600  |
| H                                            | -0.51965700  | -3.70853800 | -0.51090600 | C                                            | -1.44754200 | 1.05099000  | 1.28275400  |

|                                              |              |             |             |                                              |             |             |             |
|----------------------------------------------|--------------|-------------|-------------|----------------------------------------------|-------------|-------------|-------------|
| C                                            | -2.67002400  | 1.33680600  | -0.76740700 | C                                            | -1.39349700 | -1.00590700 | -0.86019500 |
| C                                            | -1.59034100  | 2.41040700  | 1.56220800  | H                                            | -4.79484800 | -0.87285800 | -0.67216000 |
| H                                            | -0.90587300  | 0.42721000  | 1.98912300  | H                                            | -2.97686600 | -3.33461800 | -0.48441400 |
| C                                            | -2.81828600  | 2.69820500  | -0.49435600 | H                                            | -2.64154900 | -0.59202300 | 0.85526300  |
| H                                            | -3.10415000  | 0.93885900  | -1.68114700 | H                                            | -2.71625300 | 0.58811700  | -1.50433300 |
| C                                            | -2.27722100  | 3.23858900  | 0.67218900  | H                                            | -5.07706000 | -2.42891400 | -1.44493400 |
| H                                            | -1.16905000  | 2.82330300  | 2.47484900  | H                                            | -3.97349500 | -2.68291100 | 0.81067400  |
| H                                            | -3.35732700  | 3.33495200  | -1.19064500 | H                                            | -1.73740800 | -0.07386000 | -2.80997800 |
| H                                            | -2.39165300  | 4.29712100  | 0.88853000  | H                                            | -1.60669300 | -1.99239300 | 1.07905500  |
| C                                            | -2.19055000  | -2.35278100 | 1.29682200  | H                                            | -0.91115800 | -1.87997700 | -1.31793500 |
| H                                            | -3.23573000  | -2.18412200 | 1.57850400  | C                                            | -3.46540600 | -1.27166600 | -2.32976400 |
| H                                            | -2.05947100  | -3.42842300 | 1.13521800  | H                                            | -4.10428700 | -0.75254800 | -3.05371400 |
| H                                            | -1.57047300  | -2.06668600 | 2.15210500  | H                                            | -3.05448500 | -2.14883600 | -2.84981000 |
| C                                            | -2.95916100  | -1.87531600 | -1.64597300 | C                                            | 3.76341800  | 1.01403100  | -2.10738600 |
| H                                            | -2.88134700  | -2.95185500 | -1.83498500 | C                                            | 3.05301500  | -0.33630300 | -2.28574700 |
| H                                            | -4.00024900  | -1.66079800 | -1.38231800 | C                                            | 1.55331000  | 2.12652800  | -1.57135400 |
| H                                            | -2.74104600  | -1.36351000 | -2.58949400 | C                                            | 1.58322900  | -0.16330900 | -2.70809700 |
| C                                            | 1.43251800   | -2.72487900 | 0.94192600  | C                                            | 0.77114100  | 0.81183100  | -1.82179900 |
| H                                            | 1.82931100   | -3.54434300 | 0.32666600  | H                                            | 3.83125900  | 1.52031100  | -3.08086900 |
| H                                            | 2.14305700   | -2.54514300 | 1.74885100  | H                                            | 3.11729600  | -0.90111600 | -1.34870000 |
| H                                            | 0.50938400   | -3.10350100 | 1.39446100  | H                                            | 1.57362200  | 0.24779600  | -3.72763700 |
| <b>1B</b>                                    |              |             |             | H                                            | 1.56259000  | 2.68793400  | -2.51604000 |
| Sum of electronic and thermal Free Energies= | -3147.513475 |             |             | H                                            | -0.12106800 | 1.10032200  | -2.38960900 |
| C                                            | 1.32298700   | -2.34065600 | 0.33866000  | H                                            | 4.79343900  | 0.85519900  | -1.76744700 |
| C                                            | 2.40765800   | -3.02926100 | 1.18687100  | H                                            | 3.57192500  | -0.94010100 | -3.03977800 |
| C                                            | 0.85184100   | -0.74215000 | 2.25842300  | H                                            | 1.00857000  | 2.74456600  | -0.84861300 |
| C                                            | 2.11751700   | -2.90376700 | 2.68910300  | H                                            | 1.08587700  | -1.13834200 | -2.77512800 |
| C                                            | 1.93389600   | -1.43571900 | 3.10023800  | C                                            | 3.00654500  | 1.91872500  | -1.12471200 |
| H                                            | 0.37440400   | -2.87323700 | 0.48173700  | H                                            | 3.50309100  | 2.89229700  | -1.04338300 |
| H                                            | 3.38294300   | -2.57263900 | 0.96569400  | H                                            | 3.03552100  | 1.47945500  | -0.11861800 |
| H                                            | 1.20206200   | -3.46361300 | 2.92797100  | P                                            | -0.05652400 | 0.16492200  | -0.26332300 |
| H                                            | -0.12242900  | -1.19692400 | 2.47935700  | Cu                                           | -0.82718600 | 1.80401300  | 0.89916200  |
| H                                            | 1.67623700   | -1.36478300 | 4.16316200  | Cl                                           | -1.55373200 | 3.42544000  | 2.05318300  |
| H                                            | 1.57156700   | -2.42884200 | -0.72434300 | <b>OAc<sup>-</sup></b>                       |             |             |             |
| H                                            | 2.48588300   | -4.08426800 | 0.89841800  | Sum of electronic and thermal Free Energies= | -228.480089 |             |             |
| H                                            | 0.76387400   | 0.31379900  | 2.53661600  | C                                            | 0.21991200  | 0.00054300  | -0.01300400 |
| H                                            | 2.92453500   | -3.36430400 | 3.27064800  | O                                            | 0.73573700  | 1.14711400  | 0.00297300  |
| H                                            | 2.88603300   | -0.90088100 | 2.97440600  | O                                            | 0.76936500  | -1.12991700 | 0.00306400  |
| C                                            | 1.15499000   | -0.86260700 | 0.74607500  | C                                            | -1.35471800 | -0.01654500 | -0.00426400 |
| H                                            | 2.11575100   | -0.35862700 | 0.58017100  | H                                            | -1.71651400 | 0.09450300  | 1.02870200  |
| C                                            | -4.28933800  | -1.73786300 | -1.12316200 | H                                            | -1.76299200 | 0.82501700  | -0.57818900 |
| C                                            | -3.38986700  | -2.40213700 | -0.07374000 | H                                            | -1.75246500 | -0.96108600 | -0.39520400 |
| C                                            | -2.30815700  | -0.34590200 | -1.91619800 | <b>Cl<sup>-</sup></b>                        |             |             |             |
| C                                            | -2.23648200  | -1.47818300 | 0.34683600  | Sum of electronic and thermal Free Energies= | -460.267256 |             |             |

|                                                           |             |             |             |                                                           |             |             |             |
|-----------------------------------------------------------|-------------|-------------|-------------|-----------------------------------------------------------|-------------|-------------|-------------|
| Cl                                                        | 0.00000000  | 0.00000000  | 0.00000000  | H                                                         | 1.51526400  | 1.89854600  | -3.42898100 |
| <b>2B</b>                                                 |             |             |             | H                                                         | -1.15221400 | 1.21526600  | -3.51805000 |
| Sum of electronic and thermal Free Energies= -2915.737156 |             |             |             | H                                                         | 0.55743000  | -0.06663500 | -2.65712500 |
| C                                                         | 1.69885800  | 1.79849500  | 1.49521500  | H                                                         | -0.66677500 | 4.69979100  | -2.05871800 |
| C                                                         | 1.52059200  | 2.90605800  | 2.54894300  | H                                                         | 1.74384400  | 4.01459000  | -2.26295900 |
| C                                                         | -0.51851500 | 0.77140400  | 2.21531800  | H                                                         | -1.83772000 | 0.54074700  | -2.04310800 |
| C                                                         | 0.67724700  | 2.42458500  | 3.73820100  | H                                                         | 2.36474300  | 1.61581900  | -1.92335100 |
| C                                                         | -0.67848600 | 1.87588100  | 3.27131900  | C                                                         | -1.46406200 | 2.67669000  | -1.97576000 |
| H                                                         | 2.28677700  | 0.98521500  | 1.93918700  | H                                                         | -2.44042200 | 2.94031500  | -2.39779900 |
| H                                                         | 1.02966300  | 3.77217600  | 2.08273500  | H                                                         | -1.59178800 | 2.71239800  | -0.88669000 |
| H                                                         | 1.22467800  | 1.63413000  | 4.27167500  | P                                                         | 0.36293100  | -0.04319200 | -0.34053100 |
| H                                                         | -0.04261300 | -0.10511900 | 2.67683800  | Cu                                                        | -1.35010800 | -1.30725400 | -0.13888300 |
| H                                                         | -1.25026500 | 1.49118800  | 4.12376600  | O                                                         | -3.59790400 | -0.38812000 | 0.22078200  |
| H                                                         | 2.28315100  | 2.18048600  | 0.65033700  | C                                                         | -3.78475800 | -1.62208800 | 0.20057900  |
| H                                                         | 2.50375400  | 3.25198100  | 2.89032600  | O                                                         | -2.83248700 | -2.48115800 | 0.03058000  |
| H                                                         | -1.49978000 | 0.44592500  | 1.85423800  | C                                                         | -5.17515900 | -2.20874200 | 0.37886700  |
| H                                                         | 0.53252800  | 3.24120900  | 4.45528900  | H                                                         | -5.18533400 | -2.87907400 | 1.24417400  |
| H                                                         | -1.27354700 | 2.69501800  | 2.84357200  | H                                                         | -5.91301000 | -1.41751000 | 0.51609400  |
| C                                                         | 0.33555300  | 1.25760700  | 1.02099300  | H                                                         | -5.43735000 | -2.81243500 | -0.49573500 |
| H                                                         | -0.21271800 | 2.09048100  | 0.56504200  | <b>TS1B</b>                                               |             |             |             |
| C                                                         | 3.60468400  | -3.45290700 | -0.10835000 | Sum of electronic and thermal Free Energies= -3770.515272 |             |             |             |
| C                                                         | 3.33331600  | -2.61919700 | 1.15023600  | C                                                         | 4.00395700  | 0.82683400  | 0.42856500  |
| C                                                         | 2.30026500  | -1.75979800 | -1.49303200 | C                                                         | 4.98941700  | 1.85470300  | -0.15512100 |
| C                                                         | 2.03016500  | -1.81473500 | 1.02413000  | C                                                         | 2.06310700  | 2.13975600  | -0.54376900 |
| C                                                         | 2.01622600  | -0.91407500 | -0.23279700 | C                                                         | 4.34478200  | 3.24160400  | -0.28636700 |
| H                                                         | 2.82785400  | -4.22399200 | -0.20721500 | C                                                         | 3.05147600  | 3.17208400  | -1.10958600 |
| H                                                         | 4.17220600  | -1.92863100 | 1.31785200  | H                                                         | 3.75411200  | 1.12674000  | 1.45337500  |
| H                                                         | 1.17535000  | -2.50291900 | 0.96220100  | H                                                         | 5.32429400  | 1.51381500  | -1.14531400 |
| H                                                         | 1.45980100  | -2.44876400 | -1.66131400 | H                                                         | 4.11653300  | 3.63002200  | 0.71637900  |
| H                                                         | 4.56069200  | -3.98180300 | -0.01783700 | H                                                         | 1.70195800  | 2.48042400  | 0.43459300  |
| H                                                         | 3.28096800  | -3.26530300 | 2.03444200  | H                                                         | 2.56670800  | 4.15420500  | -1.14878900 |
| H                                                         | 2.36723300  | -1.12111600 | -2.37959300 | H                                                         | 4.48833700  | -0.15213400 | 0.50102100  |
| H                                                         | 1.87678600  | -1.21745200 | 1.92904200  | H                                                         | 5.88510600  | 1.90520400  | 0.47578900  |
| H                                                         | 2.80863900  | -0.15993000 | -0.13638300 | H                                                         | 1.17957600  | 2.08493100  | -1.18399500 |
| C                                                         | 3.60269600  | -2.56766600 | -1.36080300 | H                                                         | 5.05029500  | 3.94731800  | -0.74084700 |
| H                                                         | 3.74772900  | -3.17594600 | -2.26143300 | H                                                         | 3.29896700  | 2.90262900  | -2.14671200 |
| H                                                         | 4.45287800  | -1.87225300 | -1.31447300 | C                                                         | 2.71332500  | 0.74695700  | -0.41648600 |
| C                                                         | -0.40182800 | 3.69590900  | -2.41092200 | H                                                         | 2.99982100  | 0.43656500  | -1.42934100 |
| C                                                         | 0.99164700  | 3.30566800  | -1.89627600 | C                                                         | 0.61854400  | -0.95361200 | 4.73966500  |
| C                                                         | -1.09676400 | 1.25355100  | -2.42095500 | C                                                         | 1.35488700  | 0.29432100  | 4.23664900  |
| C                                                         | 1.38559800  | 1.88561300  | -2.33707300 | C                                                         | 0.96777200  | -2.05614100 | 2.46959400  |
| C                                                         | 0.33191700  | 0.79690000  | -2.01938000 | C                                                         | 1.21924600  | 0.45337700  | 2.71392600  |
| H                                                         | -0.37918300 | 3.74681200  | -3.50912300 | C                                                         | 1.70743800  | -0.80175000 | 1.95376900  |
| H                                                         | 1.00790200  | 3.38435300  | -0.80294600 | H                                                         | -0.46099300 | -0.82556000 | 4.57930900  |

|    |             |             |             |                                              |              |             |             |
|----|-------------|-------------|-------------|----------------------------------------------|--------------|-------------|-------------|
| H  | 2.41959200  | 0.22123200  | 4.50146100  | H                                            | -4.91410700  | -1.44626000 | 1.78928300  |
| H  | 0.16532000  | 0.63288200  | 2.46249500  | H                                            | -5.57700100  | 0.19813100  | 1.66027600  |
| H  | -0.09135700 | -1.98808200 | 2.19042900  | Si                                           | -2.37862300  | 1.13803900  | -1.40138400 |
| H  | 0.76342300  | -1.07329000 | 5.81997500  | C                                            | -4.06447400  | 1.72960700  | -2.06050300 |
| H  | 0.97187500  | 1.19376100  | 4.73323400  | H                                            | -4.75022000  | 1.97269400  | -1.24408400 |
| H  | 1.35268400  | -2.95895800 | 1.98711600  | H                                            | -3.92524600  | 2.63645800  | -2.66022900 |
| H  | 1.76494600  | 1.34408600  | 2.38749800  | H                                            | -4.52760600  | 0.96053500  | -2.68446200 |
| H  | 2.78094400  | -0.92953500 | 2.14685500  | C                                            | -1.33403100  | 0.89265500  | -2.99156900 |
| C  | 1.09673800  | -2.20618400 | 3.99444000  | H                                            | -0.26031700  | 0.77196000  | -2.81516800 |
| H  | 0.53127200  | -3.08659400 | 4.32166800  | H                                            | -1.68219600  | -0.00449900 | -3.51726200 |
| H  | 2.14866400  | -2.39924300 | 4.25028900  | H                                            | -1.46258800  | 1.73606200  | -3.68092700 |
| C  | 3.90714900  | -2.56832000 | -2.92696900 | C                                            | -1.68343100  | 2.63056200  | -0.43162700 |
| C  | 4.40310700  | -2.32700400 | -1.49403900 | C                                            | -1.09183500  | 3.71802800  | -1.10273200 |
| C  | 1.50950800  | -2.34314800 | -2.14509700 | C                                            | -1.80971800  | 2.72700600  | 0.96848600  |
| C  | 3.36899500  | -2.77488700 | -0.44574200 | C                                            | -0.63473500  | 4.84387000  | -0.41386800 |
| C  | 1.94061400  | -2.21869800 | -0.66023100 | H                                            | -0.98392000  | 3.69116800  | -2.18501300 |
| H  | 3.79378300  | -3.64883700 | -3.09510100 | C                                            | -1.35190700  | 3.84945600  | 1.66389800  |
| H  | 4.63588100  | -1.26241700 | -1.37308800 | H                                            | -2.29330700  | 1.92070600  | 1.51455200  |
| H  | 3.29302400  | -3.87046200 | -0.49801000 | C                                            | -0.75898000  | 4.91002400  | 0.97586300  |
| H  | 1.30022500  | -3.40574300 | -2.32620000 | H                                            | -0.18637600  | 5.67002000  | -0.96048700 |
| H  | 1.24025500  | -2.86158300 | -0.11807600 | H                                            | -1.46455400  | 3.89872700  | 2.74422400  |
| H  | 4.65252600  | -2.21634300 | -3.65003800 | H                                            | -0.40497900  | 5.78434500  | 1.51575600  |
| H  | 5.34333000  | -2.86507000 | -1.32225200 | <b>3B</b>                                    |              |             |             |
| H  | 0.55762600  | -1.82349200 | -2.30170700 | Sum of electronic and thermal Free Energies= | -3288.112070 |             |             |
| H  | 3.73084000  | -2.55189200 | 0.56498500  | C                                            | 2.68423200   | 0.56142900  | -2.32224600 |
| C  | 2.55713200  | -1.87891200 | -3.16655900 | C                                            | 3.89581900   | 0.09404300  | -3.14819100 |
| H  | 2.19500200  | -2.09368200 | -4.17898800 | C                                            | 2.56274900   | -1.70765600 | -1.22291100 |
| H  | 2.68899000  | -0.78957600 | -3.11692600 | C                                            | 3.86588200   | -1.42251300 | -3.38625400 |
| P  | 1.47205000  | -0.56954700 | 0.10641500  | C                                            | 3.75503800   | -2.19278500 | -2.06238000 |
| Cu | -0.69218400 | -0.36454800 | -0.25834200 | H                                            | 1.77320900   | 0.36000100  | -2.89902300 |
| O  | -0.97782400 | -3.64165800 | -0.14176700 | H                                            | 4.82092000   | 0.36352500  | -2.61898000 |
| C  | -2.05737500 | -3.07722800 | -0.11410900 | H                                            | 3.00300500   | -1.66973800 | -4.02047800 |
| O  | -2.12015900 | -1.75351500 | 0.12258900  | H                                            | 1.62288600   | -1.94269900 | -1.74087200 |
| C  | -3.36502900 | -3.81239700 | -0.28429600 | H                                            | 3.66199100   | -3.26848700 | -2.25232000 |
| H  | -3.91607000 | -3.39422000 | -1.12878200 | H                                            | 2.73272500   | 1.64506400  | -2.17025900 |
| H  | -3.15945200 | -4.87292900 | -0.42978400 | H                                            | 3.91763900   | 0.62936400  | -4.10493400 |
| H  | -3.98959900 | -3.67465700 | 0.60398500  | H                                            | 2.52597600   | -2.25206400 | -0.27249100 |
| B  | -3.11588800 | -0.60519200 | -0.22586100 | H                                            | 4.75896100   | -1.73880900 | -3.93785900 |
| O  | -3.63233200 | -0.01764600 | 0.97900200  | H                                            | 4.68122700   | -2.05721400 | -1.48549200 |
| O  | -4.21647600 | -1.10669900 | -1.00237100 | C                                            | 2.62309300   | -0.18257100 | -0.97392700 |
| C  | -4.94427400 | -0.54276500 | 1.15956300  | H                                            | 3.55793700   | 0.03700000  | -0.44737900 |
| C  | -5.41667700 | -0.87673200 | -0.26784400 | C                                            | -1.77513600  | 3.83205300  | -0.69553200 |
| H  | -6.05199000 | -1.77059400 | -0.30192000 | C                                            | -1.04944300  | 3.17474700  | -1.87517900 |
| H  | -5.97532700 | -0.04273600 | -0.71370900 | C                                            | -0.18057400  | 2.65466700  | 0.90654100  |

|    |             |             |             |                                              |              |             |             |
|----|-------------|-------------|-------------|----------------------------------------------|--------------|-------------|-------------|
| C  | -0.40721200 | 1.84004400  | -1.46768500 | C                                            | -4.19698000  | -0.23474000 | -1.08946200 |
| C  | 0.56889400  | 1.99398400  | -0.27452000 | C                                            | -5.56409300  | 0.59038700  | 1.18489800  |
| H  | -2.63203400 | 3.20863800  | -0.40688500 | H                                            | -4.42714600  | -0.89587100 | 2.22911800  |
| H  | -0.27062200 | 3.85345700  | -2.25262200 | C                                            | -5.14599800  | 0.78542700  | -1.18069500 |
| H  | -1.19063900 | 1.12901900  | -1.17203800 | H                                            | -3.67618400  | -0.54553400 | -1.99375800 |
| H  | -0.96297300 | 1.96788800  | 1.26048800  | C                                            | -5.83379500  | 1.20542000  | -0.03899900 |
| H  | -2.17978000 | 4.80760700  | -0.99020300 | H                                            | -6.09805000  | 0.90385900  | 2.07912900  |
| H  | -1.74451100 | 3.00453100  | -2.70559300 | H                                            | -5.35456800  | 1.24933400  | -2.14216800 |
| H  | 0.49377800  | 2.83060300  | 1.74977700  | H                                            | -6.57419800  | 1.99842200  | -0.10448100 |
| H  | 0.09863400  | 1.39947100  | -2.33067500 | <b>4B</b>                                    |              |             |             |
| H  | 1.40328100  | 2.64604300  | -0.56818400 | Sum of electronic and thermal Free Energies= | -3599.985972 |             |             |
| C  | -0.82937600 | 3.98973300  | 0.50122500  | C                                            | 3.38610100   | 1.94326400  | 1.47640300  |
| H  | -1.36564000 | 4.40678500  | 1.36188400  | C                                            | 4.49940700   | 2.99759900  | 1.33891300  |
| H  | -0.03779700 | 4.71004800  | 0.24828800  | C                                            | 2.81878100   | 2.23584200  | -0.96233100 |
| C  | 4.82421900  | -0.06330300 | 2.69247500  | C                                            | 4.20167800   | 4.00461200  | 0.21934300  |
| C  | 4.48556800  | 1.21990500  | 1.92213100  | C                                            | 3.92797400   | 3.28944600  | -1.11095900 |
| C  | 2.40025000  | -0.80084000 | 2.58237900  | H                                            | 2.45945600   | 2.43942100  | 1.79168300  |
| C  | 3.02241100  | 1.64640200  | 2.13461100  | H                                            | 5.44984700   | 2.48799500  | 1.12529000  |
| C  | 1.96471600  | 0.53190700  | 1.91883400  | H                                            | 3.32082500   | 4.60153500  | 0.49502100  |
| H  | 4.75394400  | 0.13312900  | 3.77196500  | H                                            | 1.87892500   | 2.73441000  | -0.70200000 |
| H  | 4.69140500  | 1.06825200  | 0.85531100  | H                                            | 3.64924500   | 4.01470200  | -1.88455000 |
| H  | 2.92309400  | 1.98202300  | 3.17720600  | H                                            | 3.65768100   | 1.23848600  | 2.26856100  |
| H  | 2.27639100  | -0.67957300 | 3.66770500  | H                                            | 4.63366700   | 3.51781900  | 2.29490700  |
| H  | 1.06018500  | 0.84594400  | 2.45319300  | H                                            | 2.64089700   | 1.74054400  | -1.92082200 |
| H  | 5.86091500  | -0.36117200 | 2.49659800  | H                                            | 5.03418200   | 4.70980600  | 0.11102000  |
| H  | 5.14236100  | 2.03833500  | 2.24070400  | H                                            | 4.84959500   | 2.80077700  | -1.45853600 |
| H  | 1.71530900  | -1.60492400 | 2.28792700  | C                                            | 3.15634400   | 1.20648500  | 0.14063600  |
| H  | 2.79627700  | 2.52238300  | 1.51663000  | H                                            | 4.10614800   | 0.72497200  | -0.12223900 |
| C  | 3.86086800  | -1.19974200 | 2.32272500  | C                                            | 1.07935500   | -2.41175900 | 4.32102500  |
| H  | 4.09508200  | -2.10026100 | 2.90255900  | C                                            | 1.47884300   | -0.93123200 | 4.32674600  |
| H  | 4.00563200  | -1.46878800 | 1.26945700  | C                                            | 1.62794400   | -2.51570700 | 1.83180600  |
| P  | 1.22431400  | 0.29649200  | 0.20445800  | C                                            | 1.27656000   | -0.28951200 | 2.94470300  |
| Cu | -0.52264900 | -1.09336000 | 0.22181000  | C                                            | 2.06712500   | -1.03250700 | 1.84215100  |
| Si | -2.52145200 | -2.20026000 | 0.23952000  | H                                            | -0.00408300  | -2.49225600 | 4.15517600  |
| C  | -2.83075800 | -3.39495800 | -1.22818300 | H                                            | 2.53440400   | -0.83720200 | 4.61995200  |
| H  | -2.10463000 | -4.21627700 | -1.20545300 | H                                            | 0.20938600   | -0.32091900 | 2.68862900  |
| H  | -3.83475900 | -3.83499400 | -1.19158300 | H                                            | 0.57091300   | -2.57730400 | 1.54091000  |
| H  | -2.72134000 | -2.89592400 | -2.19747200 | H                                            | 1.28153000   | -2.86912900 | 5.29672100  |
| C  | -2.89095300 | -3.24160600 | 1.80510200  | H                                            | 0.89810600   | -0.37962400 | 5.07564800  |
| H  | -2.77233800 | -2.66501700 | 2.72930600  | H                                            | 2.18926500   | -3.09180900 | 1.09274700  |
| H  | -3.90737300 | -3.65439100 | 1.79541900  | H                                            | 1.55279000   | 0.76638400  | 2.98514800  |
| H  | -2.19135600 | -4.08398200 | 1.86144700  | H                                            | 3.13596900   | -0.99679600 | 2.09962700  |
| C  | -3.90144200 | -0.87201000 | 0.13237900  | C                                            | 1.81782300   | -3.17051100 | 3.21177800  |
| C  | -4.61371100 | -0.43097400 | 1.26360300  | H                                            | 1.47837200   | -4.21218200 | 3.16880800  |

|    |             |             |             |                                              |             |             |             |
|----|-------------|-------------|-------------|----------------------------------------------|-------------|-------------|-------------|
| H  | 2.89151000  | -3.20263400 | 3.44684900  | H                                            | -0.87323600 | -0.72864900 | -3.74764100 |
| C  | 4.85727200  | -1.40539000 | -2.99402900 | C                                            | -0.73062200 | -3.00424300 | -1.48818400 |
| C  | 5.13101400  | -1.50785700 | -1.49012600 | H                                            | 0.16869100  | -3.00769100 | -2.11397100 |
| C  | 2.37147200  | -1.15000400 | -2.54180100 | H                                            | -0.46268300 | -3.40631200 | -0.50468500 |
| C  | 3.93529300  | -2.11236000 | -0.73356500 | H                                            | -1.44037900 | -3.70831100 | -1.93967500 |
| C  | 2.54211000  | -1.48717400 | -1.03406900 | C                                            | -3.23719600 | -1.68825900 | -0.60531500 |
| H  | 4.71251600  | -2.41262300 | -3.41049500 | C                                            | -4.34723500 | -2.08309200 | -1.37594100 |
| H  | 5.37150800  | -0.50895900 | -1.10405600 | C                                            | -3.40416500 | -1.69535900 | 0.79209200  |
| H  | 3.87426300  | -3.17276300 | -1.01754600 | C                                            | -5.55559700 | -2.46563600 | -0.78745500 |
| H  | 2.13229200  | -2.09232200 | -3.05334200 | H                                            | -4.27284000 | -2.09166200 | -2.46092500 |
| H  | 1.80310400  | -2.26852700 | -0.83782000 | C                                            | -4.60334200 | -2.08448500 | 1.39331700  |
| H  | 5.72189000  | -0.97310700 | -3.51124000 | H                                            | -2.57949700 | -1.37970400 | 1.42968700  |
| H  | 6.01602000  | -2.12734000 | -1.30044500 | C                                            | -5.68742200 | -2.47078300 | 0.60219400  |
| H  | 1.49531500  | -0.50849300 | -2.68881000 | H                                            | -6.39412500 | -2.76083400 | -1.41391500 |
| H  | 4.14192900  | -2.10701300 | 0.34180900  | H                                            | -4.69474400 | -2.08112600 | 2.47701300  |
| C  | 3.60443800  | -0.55936700 | -3.24527000 | H                                            | -6.62510500 | -2.76914400 | 1.06374900  |
| H  | 3.39646500  | -0.48918700 | -4.31956000 |                                              |             |             |             |
| H  | 3.80038500  | 0.46380300  | -2.90460400 | <b>TS2B</b>                                  |             |             |             |
| P  | 1.87304000  | -0.18343300 | 0.15987600  | Sum of electronic and thermal Free Energies= |             |             |             |
| Cu | -0.36097300 | 0.41561500  | -0.20433800 |                                              |             |             |             |
| C  | -3.76883500 | 1.77771100  | -1.16082100 | C                                            | 3.50345100  | -1.33699200 | -1.87366300 |
| C  | -5.17878000 | 1.63263200  | -0.55212000 | C                                            | 4.14134000  | -2.68473800 | -2.25558700 |
| C  | -3.28825800 | 3.69200100  | 0.43562700  | C                                            | 1.80478800  | -2.54324400 | -0.46315300 |
| C  | -5.68665700 | 2.95774700  | 0.03316200  | C                                            | 3.11974800  | -3.82948500 | -2.21302200 |
| C  | -4.69173200 | 3.53190000  | 1.05167600  | C                                            | 2.41991400  | -3.89739200 | -0.84891700 |
| H  | -3.83244400 | 2.44260700  | -2.03739300 | H                                            | 2.73557600  | -1.08441300 | -2.61560700 |
| H  | -5.14463100 | 0.86985700  | 0.23505700  | H                                            | 4.96478800  | -2.90379700 | -1.56071900 |
| H  | -5.83027400 | 3.68558000  | -0.77911700 | H                                            | 2.36601600  | -3.66880700 | -2.99629400 |
| H  | -3.34193100 | 4.45258500  | -0.35979800 | H                                            | 1.01283000  | -2.27891700 | -1.17528800 |
| H  | -5.04293400 | 4.50001500  | 1.43046900  | H                                            | 1.63978500  | -4.66762500 | -0.85781400 |
| H  | -3.40993700 | 0.81210700  | -1.51183000 | H                                            | 4.26445800  | -0.55043900 | -1.91436000 |
| H  | -5.87043600 | 1.26091500  | -1.31701200 | H                                            | 4.58862600  | -2.60913700 | -3.25393200 |
| H  | -2.57310900 | 4.05305600  | 1.18001900  | H                                            | 1.32358400  | -2.62095700 | 0.51726400  |
| H  | -6.66870200 | 2.81555200  | 0.50067000  | H                                            | 3.60819400  | -4.78444600 | -2.44017700 |
| H  | -4.62626600 | 2.85755900  | 1.91608900  | H                                            | 3.14688600  | -4.19889700 | -0.08075000 |
| C  | -2.79681800 | 2.38556300  | -0.17914600 | C                                            | 2.85712500  | -1.40966000 | -0.47632100 |
| C  | -1.61699000 | 1.90051200  | 0.19032000  | H                                            | 3.64929000  | -1.65506500 | 0.24030700  |
| C  | -0.45032900 | 2.14270100  | 0.88565300  | C                                            | 3.23246700  | 4.36338100  | -1.81166400 |
| H  | 0.23600300  | 2.91813400  | 0.54838100  | C                                            | 3.34945100  | 3.09031700  | -2.65823500 |
| H  | -0.36590400 | 1.88583700  | 1.94126500  | C                                            | 2.88429400  | 2.91764700  | 0.25896500  |
| Si | -1.53463200 | -1.25451500 | -1.38723100 | C                                            | 2.56773600  | 1.92208700  | -2.03630700 |
| C  | -1.83775200 | -0.85749000 | -3.24138000 | C                                            | 3.02152100  | 1.62931800  | -0.58610900 |
| H  | -2.35992000 | -1.67265400 | -3.75824900 | H                                            | 2.19046600  | 4.71215400  | -1.82484600 |
| H  | -2.40928200 | 0.06196400  | -3.40195100 | H                                            | 4.40874900  | 2.81081400  | -2.75303200 |
|    |             |             |             | H                                            | 1.49683900  | 2.16016900  | -2.02799700 |
|    |             |             |             | H                                            | 1.82180400  | 3.18549700  | 0.33872400  |

|    |             |             |             |                                              |              |             |             |
|----|-------------|-------------|-------------|----------------------------------------------|--------------|-------------|-------------|
| H  | 3.83808200  | 5.16950000  | -2.24235200 | C                                            | -0.95236900  | -0.17129400 | -2.27920400 |
| H  | 2.98427200  | 3.27156100  | -3.67596800 | H                                            | -0.71557800  | -1.02768600 | -2.90873100 |
| H  | 3.24480600  | 2.76226800  | 1.27899400  | H                                            | -0.98639300  | 0.77925800  | -2.81357700 |
| H  | 2.66968400  | 1.03576200  | -2.66444500 | Si                                           | -1.89613000  | 1.39816100  | 0.50910100  |
| H  | 4.08362500  | 1.34433800  | -0.60038700 | C                                            | -1.37618000  | 1.74710300  | 2.32592200  |
| C  | 3.65757400  | 4.09355500  | -0.36328000 | H                                            | -1.94650800  | 2.58269600  | 2.75138400  |
| H  | 3.51358300  | 4.98917000  | 0.25282100  | H                                            | -1.52117500  | 0.87620500  | 2.97382800  |
| H  | 4.73326500  | 3.86759800  | -0.33652300 | H                                            | -0.31480700  | 2.01263300  | 2.36880800  |
| C  | 3.74761300  | -1.77997900 | 3.76542500  | C                                            | -1.44907400  | 2.97157700  | -0.48954000 |
| C  | 4.59226800  | -0.93308500 | 2.80651500  | H                                            | -0.37811200  | 3.20277000  | -0.48038200 |
| C  | 1.62374400  | -0.72653400 | 2.85511100  | H                                            | -1.75515900  | 2.87095800  | -1.53610800 |
| C  | 3.89947400  | 0.39612600  | 2.45799900  | H                                            | -1.97637100  | 3.83765900  | -0.07235900 |
| C  | 2.41985300  | 0.28988600  | 1.99329900  | C                                            | -3.80096400  | 1.40215700  | 0.54004200  |
| H  | 3.64357700  | -1.25256900 | 4.72452200  | C                                            | -4.53345300  | 1.41582400  | 1.73998700  |
| H  | 4.79454300  | -1.51376000 | 1.89759800  | C                                            | -4.53697100  | 1.46097300  | -0.65961900 |
| H  | 3.90188200  | 1.01512000  | 3.36681000  | C                                            | -5.93022700  | 1.48156900  | 1.74778300  |
| H  | 1.40430000  | -0.23449600 | 3.81258500  | H                                            | -4.01267400  | 1.37047600  | 2.69276400  |
| H  | 1.95790000  | 1.26338400  | 2.19531700  | C                                            | -5.93018400  | 1.53798800  | -0.66228200 |
| H  | 4.25395400  | -2.72763900 | 3.98324700  | H                                            | -4.01070800  | 1.43936300  | -1.61029300 |
| H  | 5.57146600  | -0.71395500 | 3.24912500  | C                                            | -6.63377100  | 1.54486900  | 0.54497000  |
| H  | 0.64942500  | -0.92688200 | 2.39391100  | H                                            | -6.46652600  | 1.48522500  | 2.69351300  |
| H  | 4.50204500  | 0.94348700  | 1.72529600  | H                                            | -6.46813600  | 1.58867300  | -1.60570300 |
| C  | 2.35839900  | -2.03941800 | 3.17018700  | H                                            | -7.71923000  | 1.59904500  | 0.54658200  |
| H  | 1.74822000  | -2.62935400 | 3.86433200  | <b>5B</b>                                    |              |             |             |
| H  | 2.46978100  | -2.65006600 | 2.26645900  | Sum of electronic and thermal Free Energies= | -3600.027131 |             |             |
| P  | 2.05636900  | 0.18483200  | 0.14340600  | C                                            | 3.90191300   | 0.09877400  | -2.17245000 |
| Cu | -0.06240800 | 0.14155200  | -0.44566200 | C                                            | 3.84233300   | 0.00877800  | -3.70814700 |
| C  | -2.90799100 | -1.84810100 | 0.61184700  | C                                            | 1.43060400   | 0.68251700  | -2.11611100 |
| C  | -4.37398800 | -2.25978000 | 0.85137300  | C                                            | 2.73859000   | 0.90597400  | -4.28622900 |
| C  | -3.23437700 | -2.25286300 | -1.89661200 | C                                            | 1.37647600   | 0.59540200  | -3.64959600 |
| C  | -4.87668700 | -3.22907800 | -0.22628400 | H                                            | 4.19672700   | 1.11812700  | -1.89251500 |
| C  | -4.70549900 | -2.61527500 | -1.62147000 | H                                            | 3.65480900   | -1.03383100 | -4.00208000 |
| H  | -2.26485700 | -2.71310600 | 0.85150500  | H                                            | 2.99460600   | 1.95849300  | -4.09842100 |
| H  | -5.00275500 | -1.36216900 | 0.84804500  | H                                            | 1.62345200   | 1.72199000  | -1.82005600 |
| H  | -4.31078900 | -4.17144000 | -0.17124000 | H                                            | 0.61032200   | 1.28004100  | -4.03138800 |
| H  | -2.66315500 | -3.19438800 | -1.98780100 | H                                            | 4.68438900   | -0.56631400 | -1.79163300 |
| H  | -5.06695500 | -3.30558800 | -2.39435800 | H                                            | 4.81691900   | 0.28017600  | -4.13151900 |
| H  | -2.61195100 | -1.06015600 | 1.31721200  | H                                            | 0.45932800   | 0.42051200  | -1.68268700 |
| H  | -4.46987800 | -2.71037000 | 1.84751000  | H                                            | 2.68628200   | 0.78847200  | -5.37497700 |
| H  | -3.13169700 | -1.74074800 | -2.85845600 | H                                            | 1.06151100   | -0.41691500 | -3.94028800 |
| H  | -5.92800900 | -3.48555900 | -0.04559200 | C                                            | 2.53525200   | -0.23654200 | -1.54167000 |
| H  | -5.31905500 | -1.70756000 | -1.69044500 | H                                            | 2.27324400   | -1.26140200 | -1.83467300 |
| C  | -2.61642300 | -1.40106100 | -0.80104600 | C                                            | 4.51553800   | 3.22701300  | 2.71214000  |
| C  | -1.78122100 | -0.38598900 | -1.13997900 | C                                            | 4.29105800   | 3.40288700  | 1.20536000  |

|    |             |             |             |                                              |             |             |              |
|----|-------------|-------------|-------------|----------------------------------------------|-------------|-------------|--------------|
| C  | 3.99789100  | 0.74422900  | 2.48100300  | H                                            | -3.96303700 | 0.33477000  | -1.45213800  |
| C  | 3.31243000  | 2.35455100  | 0.65399000  | H                                            | -5.27110700 | 2.18074900  | -2.48101600  |
| C  | 3.76312100  | 0.90740400  | 0.96268300  | H                                            | -1.39384900 | 3.22685500  | 0.47819200   |
| H  | 3.57735200  | 3.43509100  | 3.24508600  | H                                            | -4.91868900 | 4.53714600  | -1.65234100  |
| H  | 5.25319300  | 3.31332100  | 0.68073900  | H                                            | -3.73478100 | 4.05097200  | 0.47670500   |
| H  | 2.31836500  | 2.50365300  | 1.09837100  | C                                            | -2.58586200 | 1.60141200  | -0.33613800  |
| H  | 3.03320200  | 0.83254500  | 3.00135900  | C                                            | -2.24415000 | 0.68877300  | 0.61691100   |
| H  | 5.25123800  | 3.95330200  | 3.07701300  | C                                            | -1.25454800 | 0.94068500  | 1.72257200   |
| H  | 3.91059400  | 4.40789100  | 0.98817900  | H                                            | -1.18705700 | 2.00170200  | 1.99115500   |
| H  | 4.38957100  | -0.25256700 | 2.70799800  | H                                            | -1.54358700 | 0.41238000  | 2.63825200   |
| H  | 3.19131400  | 2.49864700  | -0.42432400 | Si                                           | -2.87876700 | -1.10096900 | 0.54485300   |
| H  | 4.70931100  | 0.71017800  | 0.44110600  | C                                            | -2.33433700 | -2.07855700 | 2.07974400   |
| C  | 4.97405900  | 1.79850400  | 3.03009100  | H                                            | -1.24701000 | -2.07226800 | 2.20599200   |
| H  | 5.08611200  | 1.66264800  | 4.11227800  | H                                            | -2.77472000 | -1.66953700 | 2.99487000   |
| H  | 5.96777600  | 1.63059600  | 2.59061300  | H                                            | -2.66283400 | -3.12069100 | 1.99366100   |
| C  | 3.18735800  | -4.43069100 | -0.77601800 | C                                            | -2.16312100 | -2.02106700 | -0.95898400  |
| C  | 4.28382400  | -3.35684800 | -0.82272400 | H                                            | -1.06771100 | -1.98115300 | -0.92152000  |
| C  | 1.87806900  | -3.03545400 | 0.88448800  | H                                            | -2.44851800 | -3.07925100 | -0.97115800  |
| C  | 4.35870200  | -2.55570800 | 0.48883200  | H                                            | -2.47612600 | -1.57603000 | -1.90823100  |
| C  | 3.00511300  | -1.97336100 | 0.96408100  | C                                            | -4.77826100 | -1.20405200 | 0.51390000   |
| H  | 3.44337800  | -5.17869400 | -0.01202900 | C                                            | -5.45285000 | -2.28697300 | -0.07942000  |
| H  | 4.09088200  | -2.68732500 | -1.66881000 | C                                            | -5.56375100 | -0.23036500 | 1.15991000   |
| H  | 4.71298000  | -3.23563200 | 1.27712800  | C                                            | -6.84444300 | -2.39705000 | -0.03081700  |
| H  | 2.05307900  | -3.75799800 | 1.69404200  | H                                            | -4.88693200 | -3.06073700 | -0.59357000  |
| H  | 3.11138400  | -1.73720800 | 2.02966500  | C                                            | -6.95495000 | -0.33444800 | 1.21600900   |
| H  | 3.14042900  | -4.96511700 | -1.73204500 | H                                            | -5.07755600 | 0.62952700  | 1.61424100   |
| H  | 5.25959500  | -3.81854700 | -1.01583600 | C                                            | -7.59979100 | -1.42005000 | 0.61964400   |
| H  | 0.91254500  | -2.56347300 | 1.09748800  | H                                            | -7.33859100 | -3.24341300 | -0.50136900  |
| H  | 5.11667200  | -1.76750200 | 0.41198300  | H                                            | -7.53608700 | 0.43263500  | 1.72162600   |
| C  | 1.82303700  | -3.81406000 | -0.43751100 | H                                            | -8.68274300 | -1.50253400 | 0.65937000   |
| H  | 1.05854100  | -4.59588700 | -0.36310000 | <b>TS3B</b>                                  |             |             |              |
| H  | 1.50269200  | -3.15613500 | -1.25584000 | Sum of electronic and thermal Free Energies= |             |             | -3788.583361 |
| P  | 2.45593000  | -0.28658300 | 0.34050600  | C                                            | 5.11716800  | -0.69108000 | -0.60637600  |
| Cu | 0.46974100  | 0.30140500  | 1.11135200  | C                                            | 5.91821800  | -1.97190500 | -0.89963200  |
| C  | -3.52107400 | 1.33285700  | -1.50217500 | C                                            | 3.01629900  | -1.80407900 | -1.50335400  |
| C  | -4.65279500 | 2.37802800  | -1.59593800 | C                                            | 5.30582000  | -2.76908500 | -2.06021300  |
| C  | -2.03787200 | 3.01705800  | -0.37803700 | C                                            | 3.82422600  | -3.07727900 | -1.80144900  |
| C  | -4.09842100 | 3.80816700  | -1.64120000 | H                                            | 5.19326700  | -0.02486900 | -1.47503600  |
| C  | -3.15826800 | 4.07470600  | -0.45804700 | H                                            | 5.93817100  | -2.60026300 | 0.00224000   |
| H  | -2.94711900 | 1.37230400  | -2.44501800 | H                                            | 5.39850900  | -2.18489100 | -2.98714100  |
| H  | -5.30816700 | 2.26621700  | -0.72235500 | H                                            | 2.99139700  | -1.17397400 | -2.40273400  |
| H  | -3.54287300 | 3.94986800  | -2.58040600 | H                                            | 3.38679800  | -3.60007900 | -2.66011000  |
| H  | -1.40374600 | 3.12633200  | -1.27589900 | H                                            | 5.56890900  | -0.15603100 | 0.23589400   |
| H  | -2.72288500 | 5.07964100  | -0.53548300 | H                                            | 6.96069800  | -1.71279400 | -1.12091400  |



|    |             |             |             |                                              |             |             |              |
|----|-------------|-------------|-------------|----------------------------------------------|-------------|-------------|--------------|
| H  | 1.97940200  | -2.06177600 | -1.26848300 | C                                            | -4.53021400 | -2.71853900 | -2.62061300  |
| H  | 5.86651600  | -3.69752700 | -2.22044000 | C                                            | -3.20435400 | -2.10290600 | -3.09415300  |
| H  | 3.74014900  | -3.76191000 | -0.94559900 | H                                            | -3.72987500 | -3.17165700 | 0.06761600   |
| C  | 3.63418900  | -1.01223500 | -0.32704700 | H                                            | -5.29798800 | -1.04383800 | -1.48480700  |
| H  | 3.59398600  | -1.67319300 | 0.54708100  | H                                            | -4.38607600 | -3.79883700 | -2.47228500  |
| C  | 2.97883400  | 4.44342100  | -2.27026000 | H                                            | -1.97476100 | -3.25996100 | -1.76436100  |
| C  | 3.58634400  | 3.16261200  | -2.85489600 | H                                            | -2.85070500 | -2.61116500 | -4.00084800  |
| C  | 2.68809400  | 3.26102000  | -0.03218900 | H                                            | -4.29251800 | -1.63533500 | 0.69045800   |
| C  | 3.06025200  | 1.91016600  | -2.13690200 | H                                            | -5.90994300 | -2.60418600 | -0.94649100  |
| C  | 3.29132800  | 1.96136200  | -0.60855800 | H                                            | -1.18189400 | -1.79358900 | -2.31716600  |
| H  | 1.89873200  | 4.45784300  | -2.47262900 | H                                            | -5.29996700 | -2.61125100 | -3.39522300  |
| H  | 4.68097900  | 3.20288700  | -2.76056100 | H                                            | -3.36016500 | -1.04845100 | -3.35889700  |
| H  | 1.97959500  | 1.80858500  | -2.31129900 | C                                            | -2.62939000 | -1.49569400 | -0.71157100  |
| H  | 1.59319600  | 3.21791600  | -0.12534800 | C                                            | -2.31189100 | -0.15301600 | -0.46130200  |
| H  | 3.40157000  | 5.32738500  | -2.76207900 | C                                            | -1.33583100 | 0.59115400  | -1.23215700  |
| H  | 3.36904200  | 3.08849200  | -3.92704100 | H                                            | -1.26015200 | 0.29688000  | -2.28425100  |
| H  | 2.91155700  | 3.35154000  | 1.03558800  | H                                            | -1.44170000 | 1.67585300  | -1.16036300  |
| H  | 3.52576600  | 1.01820400  | -2.56849600 | Si                                           | -3.08203700 | 0.79867500  | 1.01588900   |
| H  | 4.37127300  | 1.96206500  | -0.40976200 | C                                            | -2.25381800 | 2.49784300  | 1.19634200   |
| C  | 3.21309900  | 4.51287600  | -0.75622600 | H                                            | -1.16502400 | 2.41667600  | 1.27974400   |
| H  | 2.73532400  | 5.40492600  | -0.33401300 | H                                            | -2.47641700 | 3.16220100  | 0.35539800   |
| H  | 4.29023000  | 4.61509900  | -0.56118200 | H                                            | -2.62623800 | 2.98494500  | 2.10466500   |
| C  | 3.71918000  | -1.35204100 | 3.94387500  | C                                            | -1.07981400 | -2.39213000 | 0.70282900   |
| C  | 4.68591200  | -0.51408100 | 3.09379400  | O                                            | -1.71675800 | -3.11887100 | 1.39910000   |
| C  | 1.74222900  | -0.21379600 | 2.84409800  | O                                            | -0.01582300 | -1.95489500 | 0.34185300   |
| C  | 4.06773200  | 0.83250100  | 2.67672200  | C                                            | -2.83362100 | -0.09811000 | 2.66610200   |
| C  | 2.66717600  | 0.72353000  | 2.02658900  | H                                            | -3.33671400 | 0.43865400  | 3.47854900   |
| H  | 3.54070300  | -0.83893800 | 4.89979500  | H                                            | -3.18609900 | -1.13207700 | 2.66304600   |
| H  | 4.97711900  | -1.09083100 | 2.20858300  | H                                            | -1.76517300 | -0.12160900 | 2.90999100   |
| H  | 3.95545700  | 1.44486300  | 3.58326900  | C                                            | -4.92540200 | 1.12994200  | 0.70789200   |
| H  | 1.47829000  | 0.31557000  | 3.77072500  | C                                            | -5.92241500 | 0.78068300  | 1.63574900   |
| H  | 2.20630100  | 1.71687900  | 2.08425200  | C                                            | -5.33714500 | 1.78591300  | -0.46867500  |
| H  | 4.17506700  | -2.31819900 | 4.19024600  | C                                            | -7.26912100 | 1.07154300  | 1.40330300   |
| H  | 5.61187500  | -0.32402800 | 3.65001800  | H                                            | -5.64998200 | 0.26923600  | 2.55574300   |
| H  | 0.80912600  | -0.37820600 | 2.29633700  | C                                            | -6.67997100 | 2.08015800  | -0.70831400  |
| H  | 4.75775000  | 1.38416500  | 2.02737900  | H                                            | -4.59738500 | 2.06828200  | -1.21525000  |
| C  | 2.37701500  | -1.55742700 | 3.22730000  | C                                            | -7.65110000 | 1.72271400  | 0.22995100   |
| H  | 1.68390200  | -2.11222400 | 3.86994800  | H                                            | -8.01878200 | 0.78836400  | 2.13761700   |
| H  | 2.51750100  | -2.17738300 | 2.33289700  | H                                            | -6.96953100 | 2.58588800  | -1.62579500  |
| P  | 2.53144500  | 0.43276800  | 0.17271500  | H                                            | -8.69783300 | 1.94949100  | 0.04632000   |
| Cu | 0.42323600  | 0.20248800  | -0.43635000 | <b>6B</b>                                    |             |             |              |
| C  | -3.91869000 | -2.12771500 | -0.21108600 | Sum of electronic and thermal Free Energies= |             |             | -3788.617977 |
| C  | -5.01067100 | -2.08714000 | -1.30510600 | C                                            | -4.39723000 | 2.21869700  | -0.94015600  |
| C  | -2.14126600 | -2.19398300 | -1.97970700 | C                                            | -4.27036200 | 3.74285100  | -1.11533600  |

|   |             |             |             |    |             |             |             |
|---|-------------|-------------|-------------|----|-------------|-------------|-------------|
| C | -1.86478700 | 2.00299300  | -1.10872300 | H  | -1.80757000 | -0.50750000 | 2.56508300  |
| C | -3.01906600 | 4.11817700  | -1.92205700 | H  | -5.92126700 | -0.04519700 | 1.26649900  |
| C | -1.75166800 | 3.52403500  | -1.29144800 | C  | -2.83712700 | 1.19068500  | 3.44369900  |
| H | -4.55946900 | 1.76554100  | -1.92633400 | H  | -2.15906500 | 1.25879400  | 4.30193400  |
| H | -4.22033500 | 4.21766500  | -0.12512000 | H  | -2.43821600 | 1.88494000  | 2.69346000  |
| H | -3.12536300 | 3.73981600  | -2.94885200 | P  | -3.13713800 | -0.21934000 | 0.06912300  |
| H | -1.90180300 | 1.52112200  | -2.09539000 | Cu | -1.13947600 | -0.98794400 | -0.01902400 |
| H | -0.87225900 | 3.75787900  | -1.90238300 | C  | 3.37685400  | -1.86254000 | -0.55790700 |
| H | -5.28505900 | 1.98658400  | -0.34097900 | C  | 4.72735100  | -2.57513400 | -0.39955200 |
| H | -5.17189500 | 4.13367900  | -1.60230800 | C  | 2.72838100  | -2.58559000 | 1.76476000  |
| H | -0.97591200 | 1.61096300  | -0.60322500 | C  | 4.61867200  | -3.77258000 | 0.55304100  |
| H | -2.93173000 | 5.20822700  | -1.99964500 | C  | 4.06537900  | -3.33081500 | 1.91399100  |
| H | -1.58136700 | 3.99041000  | -0.31076500 | H  | 2.65101300  | -2.54769000 | -1.00752700 |
| C | -3.12691600 | 1.62624500  | -0.29739600 | H  | 5.48096800  | -1.87297000 | -0.02241900 |
| H | -3.00862700 | 2.08453600  | 0.69183000  | H  | 3.94839900  | -4.52591500 | 0.11427000  |
| C | -4.94098800 | -3.11312800 | -3.18153100 | H  | 1.98433700  | -3.28256600 | 1.36230100  |
| C | -4.61122800 | -1.67253700 | -3.59200400 | H  | 3.91808200  | -4.20103500 | 2.56669100  |
| C | -4.66961400 | -2.46216200 | -0.73359400 | H  | 3.48227200  | -1.02443900 | -1.25558900 |
| C | -3.71480400 | -0.98186100 | -2.55259100 | H  | 5.07815100  | -2.90375300 | -1.38579600 |
| C | -4.33202300 | -1.00997900 | -1.13492800 | H  | 2.35159700  | -2.26458600 | 2.74257400  |
| H | -4.01949600 | -3.71188700 | -3.18877000 | H  | 5.59574400  | -4.25573300 | 0.67789100  |
| H | -5.54424000 | -1.10195600 | -3.70382800 | H  | 4.80567300  | -2.69145100 | 2.40814000  |
| H | -2.73991500 | -1.48801200 | -2.51201200 | C  | 2.76739000  | -1.36767700 | 0.78761700  |
| H | -3.73461600 | -3.02949900 | -0.61915800 | C  | 3.50948600  | -0.13482700 | 1.33116800  |
| H | -5.61857400 | -3.57286900 | -3.91040100 | C  | 3.95777700  | -0.05697600 | 2.59391000  |
| H | -4.11705300 | -1.65573400 | -4.57047700 | H  | 3.84733600  | -0.85979200 | 3.31814300  |
| H | -5.17505400 | -2.48762700 | 0.23714300  | H  | 4.44125600  | 0.83676100  | 2.97931400  |
| H | -3.51258600 | 0.04775600  | -2.86554800 | Si | 3.81281900  | 1.39970800  | 0.23760400  |
| H | -5.26241200 | -0.42645000 | -1.14143600 | C  | 3.92270300  | 2.93712500  | 1.34230500  |
| C | -5.56153800 | -3.15314400 | -1.77932200 | H  | 3.01754900  | 3.04792400  | 1.94833700  |
| H | -5.74898400 | -4.18868000 | -1.47179600 | H  | 4.78338200  | 2.91126000  | 2.01791800  |
| H | -6.54031700 | -2.65319100 | -1.80216200 | H  | 4.02799200  | 3.83277200  | 0.71964600  |
| C | -4.25398200 | 1.62095900  | 3.84680000  | C  | 1.28224000  | -0.97914200 | 0.56742500  |
| C | -5.23588600 | 1.46732200  | 2.67652400  | O  | 0.79347900  | 0.04334300  | 1.09413900  |
| C | -2.81591000 | -0.24702000 | 2.90518600  | O  | 0.57664100  | -1.79876600 | -0.14028200 |
| C | -5.24450900 | 0.03087700  | 2.12623100  | C  | 2.46105900  | 1.73081000  | -1.04514600 |
| C | -3.84562200 | -0.53334200 | 1.77824600  | H  | 2.71017800  | 2.61719100  | -1.64006900 |
| H | -4.59463000 | 1.00013100  | 4.68795500  | H  | 2.30130600  | 0.89668300  | -1.73488700 |
| H | -4.96781500 | 2.17792400  | 1.88566200  | H  | 1.51794700  | 1.91497800  | -0.52513600 |
| H | -5.67177000 | -0.62175200 | 2.90119200  | C  | 5.48212100  | 1.21800800  | -0.66193000 |
| H | -3.05097500 | -0.92468700 | 3.73790400  | C  | 5.62461900  | 1.48589000  | -2.03516900 |
| H | -3.94020900 | -1.62542000 | 1.73426700  | C  | 6.64259300  | 0.84753300  | 0.04513700  |
| H | -4.25224800 | 2.65690800  | 4.20550700  | C  | 6.86388900  | 1.39354300  | -2.67420700 |
| H | -6.25111400 | 1.73406900  | 2.99397800  | H  | 4.75538000  | 1.77006700  | -2.62281700 |

|                                              |              |             |             |    |             |             |             |
|----------------------------------------------|--------------|-------------|-------------|----|-------------|-------------|-------------|
| C                                            | 7.88483600   | 0.75538800  | -0.58391300 | C  | 1.78301700  | -1.47208400 | 2.75733500  |
| H                                            | 6.57225800   | 0.61562000  | 1.10571600  | C  | 4.29904600  | -1.52421000 | 3.21976600  |
| C                                            | 7.99854200   | 1.02917200  | -1.94890900 | C  | 3.15849400  | -0.83355600 | 2.43260400  |
| H                                            | 6.94220900   | 1.60460000  | -3.73773500 | H  | 2.67243500  | -3.33892100 | 4.64998800  |
| H                                            | 8.76279400   | 0.46653900  | -0.01172200 | H  | 4.50881000  | -3.44020500 | 2.20256400  |
| H                                            | 8.96378400   | 0.95589300  | -2.44285300 | H  | 4.20797500  | -1.20161200 | 4.26700700  |
| <b>7B</b>                                    |              |             |             | H  | 1.51460200  | -1.15848200 | 3.77592400  |
| Sum of electronic and thermal Free Energies= | -4643.426945 |             |             | H  | 3.09474300  | 0.19949800  | 2.79565900  |
| C                                            | 5.40059400   | -2.41950000 | -0.29617000 | H  | 2.86263300  | -4.69522500 | 3.54573400  |
| C                                            | 5.66466800   | -3.78557700 | -0.95371700 | H  | 5.02303500  | -3.45085300 | 3.87735200  |
| C                                            | 3.29430100   | -2.16461900 | -1.69224100 | H  | 1.01620300  | -1.05986500 | 2.09420200  |
| C                                            | 5.06828500   | -3.85803600 | -2.36632900 | H  | 5.27986200  | -1.16787500 | 2.88278700  |
| C                                            | 3.56965200   | -3.52432600 | -2.35319200 | C  | 1.76592500  | -3.00654900 | 2.71731800  |
| H                                            | 5.93568100   | -1.64793700 | -0.86404900 | H  | 0.78320900  | -3.36340600 | 3.04651700  |
| H                                            | 5.22391500   | -4.57799300 | -0.33220000 | H  | 1.88485200  | -3.36299300 | 1.68576500  |
| H                                            | 5.59345200   | -3.14425500 | -3.01698000 | P  | 3.38454100  | -0.49755400 | 0.59747500  |
| H                                            | 3.71979100   | -1.36534300 | -2.31407800 | Cu | 1.59710000  | 0.28629300  | -0.28800900 |
| H                                            | 3.16683500   | -3.52978200 | -3.37281100 | C  | -2.20727400 | -2.41828200 | -0.66516900 |
| H                                            | 5.81985100   | -2.40745700 | 0.71551400  | C  | -2.99963600 | -3.57045100 | -1.30050700 |
| H                                            | 6.74377600   | -3.97814100 | -0.98377900 | C  | -1.93654800 | -1.36630200 | -2.93519700 |
| H                                            | 2.21532000   | -1.97913100 | -1.64199500 | C  | -2.57514200 | -3.81447000 | -2.75391700 |
| H                                            | 5.23291400   | -4.85217000 | -2.79792700 | C  | -2.70983200 | -2.52775800 | -3.57789200 |
| H                                            | 3.02977600   | -4.30621500 | -1.80067200 | H  | -1.14635600 | -2.68639800 | -0.62300700 |
| C                                            | 3.89337500   | -2.09355200 | -0.26896100 | H  | -4.07284600 | -3.35119400 | -1.26506900 |
| H                                            | 3.39407300   | -2.87326000 | 0.31854600  | H  | -1.52926600 | -4.15474900 | -2.77743500 |
| C                                            | 6.05801800   | 3.31523500  | -0.16404100 | H  | -0.86718200 | -1.62256100 | -2.94369400 |
| C                                            | 6.17846600   | 2.13096400  | -1.13184700 | H  | -2.33847500 | -2.68323000 | -4.59870600 |
| C                                            | 4.75533400   | 1.84338300  | 1.45687400  | H  | -2.52071400 | -2.28054400 | 0.37380800  |
| C                                            | 5.00863200   | 1.14907300  | -0.96553400 | H  | -2.85188700 | -4.47810900 | -0.70289800 |
| C                                            | 4.86744000   | 0.64499400  | 0.48905500  | H  | -2.03303900 | -0.44986800 | -3.52320900 |
| H                                            | 5.17260000   | 3.91032200  | -0.42771200 | H  | -3.17539300 | -4.61688000 | -3.19967700 |
| H                                            | 7.12517300   | 1.60355100  | -0.94682100 | H  | -3.77024500 | -2.26621200 | -3.66559100 |
| H                                            | 4.06878100   | 1.64153800  | -1.25089300 | C  | -2.32984600 | -1.08375600 | -1.44621800 |
| H                                            | 3.80839700   | 2.37158800  | 1.27676100  | C  | -3.72174100 | -0.43553900 | -1.27361000 |
| H                                            | 6.92367300   | 3.98047200  | -0.26370900 | C  | -4.39052700 | 0.09504900  | -2.30893300 |
| H                                            | 6.21686300   | 2.48475300  | -2.16899800 | H  | -4.01871400 | 0.08697300  | -3.33002500 |
| H                                            | 4.73171700   | 1.50002200  | 2.49609100  | H  | -5.34772300 | 0.59104600  | -2.17788200 |
| H                                            | 5.13544800   | 0.30551600  | -1.65274500 | Si | -4.55292000 | -0.28308700 | 0.44159400  |
| H                                            | 5.76805100   | 0.07573900  | 0.75438900  | C  | -5.88334700 | 1.06040900  | 0.37662900  |
| C                                            | 5.92612800   | 2.82625200  | 1.28377500  | H  | -5.46126400 | 2.02434500  | 0.07488500  |
| H                                            | 5.79219600   | 3.67548900  | 1.96393000  | H  | -6.70487100 | 0.81373000  | -0.30360900 |
| H                                            | 6.85935600   | 2.32925400  | 1.58528800  | H  | -6.31762200 | 1.18385200  | 1.37507200  |
| C                                            | 2.87194500   | -3.60025200 | 3.60082200  | C  | -1.24632700 | -0.08304600 | -0.96670000 |
| C                                            | 4.25332700   | -3.06251000 | 3.19948900  | O  | -1.35562800 | 1.09902900  | -1.47197200 |

|    |             |             |             |                                              |              |             |             |
|----|-------------|-------------|-------------|----------------------------------------------|--------------|-------------|-------------|
| O  | -0.31171400 | -0.45748100 | -0.22248600 | H                                            | -5.60455200  | 5.64773800  | 1.41406200  |
| C  | -3.30956200 | 0.19468300  | 1.78246900  | <b>TS4B</b>                                  |              |             |             |
| H  | -3.78026600 | 0.16044400  | 2.77150900  | Sum of electronic and thermal Free Energies= | -4643.406863 |             |             |
| H  | -2.42004300 | -0.44140400 | 1.80574300  | C                                            | -4.49504800  | -3.00943800 | 0.74203600  |
| H  | -2.98192700 | 1.22563500  | 1.61587500  | C                                            | -4.39909800  | -4.29749300 | 1.57887700  |
| C  | -5.41494000 | -1.91168200 | 0.91515200  | C                                            | -2.48189800  | -2.06463300 | 1.95840400  |
| C  | -5.08812200 | -2.62886800 | 2.07968000  | C                                            | -3.75343100  | -4.03616300 | 2.94722600  |
| C  | -6.45095700 | -2.42572600 | 0.11115400  | C                                            | -2.38825500  | -3.34894500 | 2.79767100  |
| C  | -5.75961000 | -3.80414200 | 2.42702400  | H                                            | -5.17341800  | -2.31200000 | 1.24914000  |
| H  | -4.29644900 | -2.26822200 | 2.73184500  | H                                            | -3.80164600  | -5.03996500 | 1.03065300  |
| C  | -7.12796100 | -3.59760500 | 0.45077400  | H                                            | -4.41867300  | -3.39360300 | 3.54155600  |
| H  | -6.73277500 | -1.90551300 | -0.80215500 | H                                            | -3.08945100  | -1.32476000 | 2.49514000  |
| C  | -6.78210100 | -4.29161600 | 1.61266000  | H                                            | -1.96812700  | -3.11757600 | 3.78363600  |
| H  | -5.48480800 | -4.33724700 | 3.33358900  | H                                            | -4.94727700  | -3.23214400 | -0.22973600 |
| H  | -7.92359200 | -3.97005000 | -0.18928400 | H                                            | -5.39788100  | -4.73309200 | 1.70379200  |
| H  | -7.30667100 | -5.20481100 | 1.88054700  | H                                            | -1.49489300  | -1.61174300 | 1.83375300  |
| B  | -0.32521600 | 2.26095100  | -1.32766000 | H                                            | -3.64980200  | -4.97532600 | 3.50353500  |
| O  | 1.04346000  | 1.70677500  | -1.60350500 | H                                            | -1.68466700  | -4.04247700 | 2.31515800  |
| O  | -0.59242300 | 3.15149300  | -2.43629900 | C                                            | -3.10930100  | -2.35337200 | 0.57526400  |
| C  | 1.26262000  | 1.83544400  | -3.01503700 | H                                            | -2.45303000  | -3.08110400 | 0.08154500  |
| C  | 0.46493300  | 3.09777900  | -3.37272200 | C                                            | -6.51310400  | 2.29967600  | -0.11790900 |
| H  | 1.10144000  | 3.99298300  | -3.28888100 | C                                            | -6.29294200  | 1.27854700  | 1.00531400  |
| H  | 0.07517900  | 3.05646200  | -4.39838600 | C                                            | -4.94051100  | 0.97179500  | -1.61408800 |
| H  | 2.33607600  | 1.92335600  | -3.21485000 | C                                            | -4.91979100  | 0.59668000  | 0.89065400  |
| H  | 0.87550800  | 0.95267200  | -3.54402800 | C                                            | -4.71353300  | -0.06369600 | -0.49227700 |
| Si | -0.37627500 | 3.25464400  | 0.47579500  | H                                            | -5.79810700  | 3.12619500  | -0.00229100 |
| C  | 0.89826600  | 4.67282600  | 0.38031700  | H                                            | -7.08248500  | 0.51465000  | 0.96070800  |
| H  | 0.90966500  | 5.27802300  | 1.29389000  | H                                            | -4.12301900  | 1.33470700  | 1.05208300  |
| H  | 1.90897900  | 4.27504300  | 0.22574900  | H                                            | -4.15774900  | 1.73960500  | -1.56486400 |
| H  | 0.67467000  | 5.33846800  | -0.45998800 | H                                            | -7.51463000  | 2.73970300  | -0.04404600 |
| C  | 0.10896400  | 2.22687300  | 2.01597400  | H                                            | -6.38273700  | 1.76117800  | 1.98588600  |
| H  | 1.03882900  | 1.67694400  | 1.82324400  | H                                            | -4.86167700  | 0.50069300  | -2.59931600 |
| H  | 0.28295200  | 2.86028600  | 2.89373000  | H                                            | -4.81210000  | -0.14390600 | 1.68931400  |
| H  | -0.65186900 | 1.48579800  | 2.27682700  | H                                            | -5.46232100  | -0.85871200 | -0.61095800 |
| C  | -2.08994500 | 4.02075000  | 0.80555000  | C                                            | -6.31647100  | 1.64924900  | -1.49312200 |
| C  | -2.93196700 | 4.36823200  | -0.27032100 | H                                            | -6.42806600  | 2.39461400  | -2.28943800 |
| C  | -2.56488100 | 4.27787900  | 2.10560600  | H                                            | -7.10333000  | 0.89881700  | -1.65565000 |
| C  | -4.18346900 | 4.95077900  | -0.05512400 | C                                            | -2.04865400  | -4.25833700 | -3.13836400 |
| H  | -2.59959400 | 4.18056100  | -1.28842200 | C                                            | -3.48158800  | -3.95227100 | -2.67949200 |
| C  | -3.81637800 | 4.85757000  | 2.32793700  | C                                            | -1.38461100  | -1.85078300 | -2.70395600 |
| H  | -1.94995100 | 4.02057500  | 2.96543400  | C                                            | -3.85490700  | -2.47743000 | -2.90923300 |
| C  | -4.63002300 | 5.19669400  | 1.24557600  | C                                            | -2.83997400  | -1.45302200 | -2.34430700 |
| H  | -4.81122900 | 5.21268100  | -0.90344700 | H                                            | -1.97957300  | -4.12739100 | -4.22782800 |
| H  | -4.15647300 | 5.04334700  | 3.34390200  | H                                            | -3.57905700  | -4.21246100 | -1.61931900 |

|    |             |             |             |                                              |              |             |             |
|----|-------------|-------------|-------------|----------------------------------------------|--------------|-------------|-------------|
| H  | -3.90505600 | -2.31323400 | -3.99543000 | C                                            | 5.26997600   | -1.58612700 | -1.05879700 |
| H  | -1.24740900 | -1.64779300 | -3.77536400 | C                                            | 4.80904200   | -2.75721200 | -1.68583000 |
| H  | -3.02132000 | -0.50605100 | -2.86549100 | C                                            | 6.57601000   | -1.60807500 | -0.53193100 |
| H  | -1.80230900 | -5.30705800 | -2.93443500 | C                                            | 5.60887400   | -3.89897800 | -1.78051800 |
| H  | -4.19609900 | -4.58843800 | -3.21577200 | H                                            | 3.80877600   | -2.78325700 | -2.11114900 |
| H  | -0.68130800 | -1.20050800 | -2.17393600 | C                                            | 7.38191000   | -2.74372400 | -0.62161100 |
| H  | -4.86414100 | -2.27595000 | -2.53191600 | H                                            | 6.97388200   | -0.72341100 | -0.03882200 |
| C  | -1.03959200 | -3.32592800 | -2.45458300 | C                                            | 6.89829200   | -3.89497800 | -1.24745500 |
| H  | -0.02658100 | -3.52420800 | -2.82385400 | H                                            | 5.22575300   | -4.78994100 | -2.27133900 |
| H  | -1.01451000 | -3.53442300 | -1.37741400 | H                                            | 8.38576500   | -2.73124000 | -0.20516000 |
| P  | -3.01119100 | -0.85278600 | -0.56752300 | H                                            | 7.52303700   | -4.78110200 | -1.31991900 |
| Cu | -1.31192800 | 0.43546500  | -0.00337500 | B                                            | -0.33606700  | 2.08183700  | 1.38620900  |
| C  | 2.72339300  | -1.80381900 | 1.43714100  | O                                            | -1.33479000  | 1.27364300  | 2.08991200  |
| C  | 3.91152200  | -2.48005400 | 2.13746300  | O                                            | -0.32599600  | 3.37550600  | 2.01898200  |
| C  | 2.73401700  | 0.00440000  | 3.18483000  | C                                            | -1.70582400  | 1.97552700  | 3.27763100  |
| C  | 3.93458400  | -2.18004200 | 3.64090100  | C                                            | -1.40101100  | 3.44030200  | 2.94213700  |
| C  | 3.92284300  | -0.66602600 | 3.88712400  | H                                            | -2.27495700  | 3.93107700  | 2.48673800  |
| H  | 1.78879600  | -2.22430800 | 1.82715200  | H                                            | -1.09955000  | 4.02360000  | 3.81994800  |
| H  | 4.85068400  | -2.14277500 | 1.68545100  | H                                            | -2.76215500  | 1.79170800  | 3.50429000  |
| H  | 3.05409400  | -2.63297600 | 4.11988300  | H                                            | -1.10014900  | 1.62579000  | 4.12629300  |
| H  | 1.80526700  | -0.39426600 | 3.61688600  | Si                                           | -0.67976900  | 2.80461500  | -0.72428100 |
| H  | 3.87258500  | -0.45130200 | 4.96184300  | C                                            | -2.06518300  | 4.09927700  | -0.53648900 |
| H  | 2.73124200  | -2.04247900 | 0.37027900  | H                                            | -2.21385900  | 4.65563100  | -1.46886600 |
| H  | 3.85977000  | -3.56159100 | 1.96345100  | H                                            | -3.01941600  | 3.62819800  | -0.27274300 |
| H  | 2.70913000  | 1.07830200  | 3.37920700  | H                                            | -1.82032400  | 4.81910900  | 0.24891200  |
| H  | 4.81509100  | -2.63738900 | 4.10830000  | C                                            | -1.05604100  | 1.99207200  | -2.43618300 |
| H  | 4.86194500  | -0.23188700 | 3.52378500  | H                                            | -2.08226900  | 1.62314700  | -2.50101300 |
| C  | 2.67979200  | -0.26757700 | 1.64898200  | H                                            | -0.95173200  | 2.76439900  | -3.20910200 |
| C  | 3.77512000  | 0.47156600  | 0.83310600  | H                                            | -0.38487300  | 1.17092600  | -2.70644100 |
| C  | 4.40373100  | 1.54553600  | 1.33753600  | C                                            | 0.96313000   | 3.73976700  | -1.05298900 |
| H  | 4.21359600  | 1.93232800  | 2.33486700  | C                                            | 1.51513700   | 4.62741300  | -0.10556400 |
| H  | 5.13268600  | 2.10683100  | 0.76166800  | C                                            | 1.64245300   | 3.62213000  | -2.28090800 |
| Si | 4.22242400  | -0.00161900 | -0.96790400 | C                                            | 2.67355500   | 5.35730000  | -0.37436300 |
| C  | 5.27087300  | 1.37968800  | -1.72575800 | H                                            | 1.03307000   | 4.73533900  | 0.85991600  |
| H  | 4.74492700  | 2.33913900  | -1.70798400 | C                                            | 2.80556300   | 4.34835600  | -2.55625300 |
| H  | 6.23513900  | 1.50561000  | -1.22280000 | H                                            | 1.26205700   | 2.95954300  | -3.05237300 |
| H  | 5.48367200  | 1.13073000  | -2.77162800 | C                                            | 3.32543300   | 5.22293900  | -1.60223000 |
| C  | 1.31705100  | 0.27343300  | 1.16554400  | H                                            | 3.06905500   | 6.03469100  | 0.37865200  |
| O  | 1.04978000  | 1.48893100  | 1.54175100  | H                                            | 3.29846000   | 4.23373600  | -3.51861300 |
| O  | 0.53423000  | -0.42477700 | 0.49193000  | H                                            | 4.22552300   | 5.79452000  | -1.81351200 |
| C  | 2.67552500  | -0.21060700 | -2.03618900 | <b>8B</b>                                    |              |             |             |
| H  | 2.95397000  | -0.49241600 | -3.05805300 | Sum of electronic and thermal Free Energies= | -3599.994184 |             |             |
| H  | 1.97504400  | -0.95306600 | -1.64574200 | C                                            | 3.94873300   | -0.55714900 | -0.99702900 |
| H  | 2.14752200  | 0.74703000  | -2.08610200 | C                                            | 5.23069700   | -0.75673800 | -0.16103900 |

|    |             |             |             |   |             |             |             |
|----|-------------|-------------|-------------|---|-------------|-------------|-------------|
| C  | 3.97152700  | -3.01146200 | -1.61333600 | C | 2.49483800  | 1.88876000  | 1.82948600  |
| C  | 6.07726800  | -1.91927600 | -0.69854700 | H | 0.44553900  | 2.20939600  | 2.36360400  |
| C  | 5.25445100  | -3.21248900 | -0.78128300 | C | 1.52103100  | 0.46334400  | 4.24041100  |
| H  | 4.24483100  | -0.22719100 | -2.00600500 | H | 1.52185300  | -0.65442800 | 2.38730600  |
| H  | 4.94728000  | -0.96746300 | 0.87964700  | H | -0.08189500 | -0.18360900 | 2.92960900  |
| H  | 6.44891200  | -1.66156500 | -1.70102000 | C | 3.05949200  | 2.19623800  | 3.22851200  |
| H  | 4.26442200  | -2.81388300 | -2.65732000 | H | 3.11766700  | 1.11771900  | 1.35941200  |
| H  | 5.85676400  | -4.02190500 | -1.21194800 | H | 2.57402700  | 2.78518400  | 1.20662600  |
| H  | 3.33463100  | 0.23487600  | -0.56767600 | C | 2.96217000  | 0.98388500  | 4.16346400  |
| H  | 5.81736200  | 0.17032100  | -0.14863200 | H | 1.47176900  | -0.44123300 | 4.85794600  |
| H  | 3.36589300  | -3.92184800 | -1.61716300 | H | 0.88915800  | 1.21359600  | 4.73704700  |
| H  | 6.96175100  | -2.06884700 | -0.06753600 | H | 4.10101900  | 2.52731600  | 3.13775900  |
| H  | 4.97580800  | -3.53034200 | 0.23259200  | H | 2.50206900  | 3.03758800  | 3.66450600  |
| C  | 3.14753500  | -1.83392900 | -1.10380700 | H | 3.32995600  | 1.24344000  | 5.16324100  |
| C  | 1.86484400  | -1.98639200 | -0.78237900 | H | 3.61614900  | 0.18459400  | 3.78708800  |
| C  | 0.87939100  | -2.96020000 | -0.69675300 | C | -1.41683700 | 1.97785400  | 0.44987500  |
| H  | 0.33077600  | -3.29096300 | -1.57987600 | C | -2.29356200 | 1.96626200  | -0.81953700 |
| H  | 0.88169500  | -3.68953300 | 0.11308900  | C | -2.25020700 | 1.51055000  | 1.65981000  |
| Cu | 0.09584300  | -1.25180200 | -0.09556700 | H | -1.10266000 | 3.01459200  | 0.64046100  |
| Si | -1.94019700 | -2.33066200 | 0.52840400  | C | -3.54015500 | 2.85244400  | -0.63956600 |
| C  | -1.97889100 | -4.20551000 | 0.10821000  | H | -2.60503500 | 0.93808200  | -1.03689800 |
| H  | -1.86581100 | -4.39066100 | -0.96611200 | H | -1.73037900 | 2.31687500  | -1.68931100 |
| H  | -1.18244800 | -4.75639200 | 0.62240900  | C | -3.49580700 | 2.39474100  | 1.85072600  |
| H  | -2.93469000 | -4.64538800 | 0.41605200  | H | -2.55755000 | 0.47217700  | 1.49754000  |
| P  | 0.18791200  | 1.01656200  | 0.25993700  | H | -1.65453200 | 1.52785200  | 2.57885400  |
| C  | 1.13584500  | 1.98395700  | -1.05298200 | C | -4.36408900 | 2.43952600  | 0.58658200  |
| C  | 0.93541600  | 1.39015600  | -2.46613600 | H | -4.15681700 | 2.80292500  | -1.54465200 |
| C  | 0.93572400  | 3.51472200  | -1.06022400 | H | -3.22341700 | 3.90065300  | -0.53300000 |
| H  | 2.18326900  | 1.79769600  | -0.79052200 | H | -4.08046600 | 2.02457100  | 2.70157000  |
| C  | 1.84860300  | 2.08038000  | -3.49346700 | H | -3.17529900 | 3.41384800  | 2.11286800  |
| H  | -0.10938300 | 1.50549400  | -2.78027700 | H | -5.20345100 | 3.13132500  | 0.72873600  |
| H  | 1.14178000  | 0.31459100  | -2.44331800 | H | -4.79675900 | 1.44789500  | 0.40961300  |
| C  | 1.86139900  | 4.18880400  | -2.08875400 | C | -2.24669700 | -2.33595500 | 2.42489000  |
| H  | -0.10313900 | 3.75708300  | -1.31326200 | H | -1.38934900 | -2.79980800 | 2.92787900  |
| H  | 1.11787100  | 3.93545200  | -0.06414600 | H | -2.37490000 | -1.33897200 | 2.85837400  |
| C  | 1.66085700  | 3.60421700  | -3.49416600 | H | -3.13023000 | -2.93135500 | 2.68728900  |
| H  | 1.65682000  | 1.67113900  | -4.49247100 | C | -3.55855800 | -1.72797300 | -0.30726500 |
| H  | 2.89589800  | 1.84569700  | -3.25642200 | C | -4.74589200 | -1.47488200 | 0.40459800  |
| H  | 1.68108500  | 5.27060000  | -2.09473100 | C | -3.62118300 | -1.60202800 | -1.70952000 |
| H  | 2.90785000  | 4.04864400  | -1.78267900 | C | -5.93114000 | -1.11385900 | -0.24437000 |
| H  | 2.35356200  | 4.07331400  | -4.20293200 | H | -4.75355600 | -1.56831800 | 1.48794800  |
| H  | 0.64653100  | 3.84496700  | -3.84321300 | C | -4.79826400 | -1.24252100 | -2.36834300 |
| C  | 1.03527300  | 1.39903000  | 1.91270200  | H | -2.72801000 | -1.79483800 | -2.30284000 |
| C  | 0.95130500  | 0.16686100  | 2.84361800  | C | -5.96110100 | -0.99394400 | -1.63473700 |

|                                              |              |             |             |   |             |             |             |
|----------------------------------------------|--------------|-------------|-------------|---|-------------|-------------|-------------|
| H                                            | -6.83224600  | -0.93009500 | 0.33610000  | H | 1.79599600  | -1.76015300 | 3.71705300  |
| H                                            | -4.81081400  | -1.15799300 | -3.45238600 | H | 0.01371100  | -5.07945400 | 3.09077600  |
| H                                            | -6.88064000  | -0.71432300 | -2.14194400 | H | 1.48544200  | -4.19538400 | 2.70514500  |
| <b>TSSB</b>                                  |              |             |             | H | 0.74051400  | -3.60744700 | 4.99774500  |
| Sum of electronic and thermal Free Energies= | -3599.970760 |             |             | H | -0.85013900 | -3.15525200 | 4.39697000  |
| C                                            | 4.08440300   | 0.31040500  | 1.30161000  | C | 0.55291200  | -2.14843400 | -1.59616300 |
| C                                            | 5.43049600   | 0.13784200  | 0.56863000  | C | 0.72966700  | -1.20919800 | -2.81273500 |
| C                                            | 4.19687700   | 2.81051300  | 0.94742300  | C | 1.92340100  | -2.73566700 | -1.19642100 |
| C                                            | 6.29995200   | 1.39755000  | 0.69826700  | H | -0.09888900 | -2.98313500 | -1.89353100 |
| C                                            | 5.54794600   | 2.64801200  | 0.21831000  | C | 1.40161600  | -1.91844800 | -3.99838900 |
| H                                            | 4.29406700   | 0.38345400  | 2.38272500  | H | 1.35023600  | -0.35750400 | -2.50192100 |
| H                                            | 5.23292700   | -0.05608600 | -0.49522400 | H | -0.23332700 | -0.79417100 | -3.12523200 |
| H                                            | 6.58426100   | 1.53092400  | 1.75261200  | C | 2.60109000  | -3.44528200 | -2.38212900 |
| H                                            | 4.40708300   | 3.02324900  | 2.00912500  | H | 2.57279400  | -1.92642100 | -0.83779100 |
| H                                            | 6.16750300   | 3.54277700  | 0.36202000  | H | 1.81727500  | -3.44845700 | -0.37293300 |
| H                                            | 3.44804300   | -0.56898500 | 1.15727100  | C | 2.75377200  | -2.52118700 | -3.59683800 |
| H                                            | 5.96886400   | -0.73709400 | 0.95599600  | H | 1.52697100  | -1.21143200 | -4.82717900 |
| H                                            | 3.65886600   | 3.67967800  | 0.55443400  | H | 0.74077300  | -2.71647600 | -4.36686500 |
| H                                            | 7.23560400   | 1.27710600  | 0.13751300  | H | 3.57945800  | -3.82700000 | -2.06663700 |
| H                                            | 5.36130700   | 2.56294700  | -0.86122800 | H | 2.00204100  | -4.32245600 | -2.66695300 |
| C                                            | 3.34546600   | 1.55320800  | 0.84131300  | H | 3.19504400  | -3.06800400 | -4.43863500 |
| C                                            | 2.09237500   | 1.51334300  | 0.37340200  | H | 3.45154600  | -1.70930100 | -3.34870100 |
| C                                            | 1.28695100   | 2.67281000  | -0.09314600 | C | -2.12576900 | -1.82811700 | -0.42267000 |
| H                                            | 1.05680800   | 3.42153800  | 0.67277800  | C | -3.05373900 | -1.30019300 | 0.69074800  |
| H                                            | 1.65920000   | 3.17569000  | -0.99392100 | C | -2.70441600 | -1.47027900 | -1.80689700 |
| Cu                                           | 0.39656100   | 0.82142000  | -0.15541800 | H | -2.09032800 | -2.92568700 | -0.35190600 |
| Si                                           | -0.80784100  | 2.81717900  | -0.92140000 | C | -4.49090500 | -1.82320300 | 0.52662200  |
| C                                            | -0.59706000  | 4.71032500  | -1.02168300 | H | -3.06055700 | -0.20434700 | 0.66848100  |
| H                                            | -0.43975300  | 5.16308700  | -0.03719200 | H | -2.67840900 | -1.59244300 | 1.67546100  |
| H                                            | 0.24278600   | 5.00143300  | -1.66255500 | C | -4.13989600 | -1.99903900 | -1.97217800 |
| H                                            | -1.50690100  | 5.15337100  | -1.44236100 | H | -2.70537300 | -0.37907200 | -1.92317600 |
| P                                            | -0.35092900  | -1.23708900 | -0.20542600 | H | -2.07828900 | -1.87669800 | -2.60775900 |
| C                                            | 0.23806700   | -2.04240500 | 1.38861100  | C | -5.06495300 | -1.49351400 | -0.85755600 |
| C                                            | 0.03992700   | -1.13656200 | 2.62428900  | H | -5.12559500 | -1.39750400 | 1.31276000  |
| C                                            | -0.26572200  | -3.47445900 | 1.65579600  | H | -4.49918100 | -2.91320100 | 0.67294800  |
| H                                            | 1.32248200   | -2.08879700 | 1.23008600  | H | -4.52835600 | -1.70596500 | -2.95517100 |
| C                                            | 0.70735800   | -1.74941600 | 3.86650500  | H | -4.12153000 | -3.09838800 | -1.96049900 |
| H                                            | -1.02782000  | -0.98515100 | 2.82467200  | H | -6.06668000 | -1.92593600 | -0.96893200 |
| H                                            | 0.47361400   | -0.15246000 | 2.41481200  | H | -5.17829800 | -0.40511800 | -0.94722400 |
| C                                            | 0.41065900   | -4.07471700 | 2.90108900  | C | -1.14466400 | 2.31667400  | -2.72960900 |
| H                                            | -1.35114300  | -3.46334400 | 1.81543500  | H | -0.21445100 | 2.37158200  | -3.30707300 |
| H                                            | -0.08594200  | -4.11873400 | 0.78654700  | H | -1.53463400 | 1.30152500  | -2.83123100 |
| C                                            | 0.21726400   | -3.18014800 | 4.13401100  | H | -1.85334300 | 3.00938500  | -3.19978000 |
| H                                            | 0.52020900   | -1.11242600 | 4.73923000  | C | -2.36552300 | 2.61403700  | 0.15480400  |

|                                              |              |             |             |   |             |             |             |
|----------------------------------------------|--------------|-------------|-------------|---|-------------|-------------|-------------|
| C                                            | -3.63933400  | 2.43741500  | -0.41837800 | H | 0.20656100  | -1.38453200 | 2.48609800  |
| C                                            | -2.29746800  | 2.70415400  | 1.55899900  | H | -0.08838100 | 0.30771400  | 2.15248500  |
| C                                            | -4.78950900  | 2.35239500  | 0.37062900  | C | 3.28160300  | -0.91532700 | 3.84542500  |
| H                                            | -3.74180700  | 2.37382800  | -1.49916300 | H | 2.73003200  | -2.26859300 | 2.25521800  |
| C                                            | -3.44132800  | 2.61313700  | 2.35389700  | H | 3.98546400  | -1.12424000 | 1.80104400  |
| H                                            | -1.33483400  | 2.84781700  | 2.04634900  | C | 1.97827700  | -0.98960300 | 4.65442700  |
| C                                            | -4.69366600  | 2.43580700  | 1.76130500  | H | -0.03942700 | -0.17675100 | 4.61907200  |
| H                                            | -5.76102600  | 2.22644700  | -0.10084100 | H | 1.21054500  | 0.97315400  | 4.16152600  |
| H                                            | -3.35634500  | 2.68468500  | 3.43515300  | H | 4.02526900  | -1.61103300 | 4.25264200  |
| H                                            | -5.58651600  | 2.36948600  | 2.37683700  | H | 3.71149100  | 0.09183900  | 3.94177200  |
| <b>9B</b>                                    |              |             |             | H | 2.16782600  | -0.72506500 | 5.70145100  |
| Sum of electronic and thermal Free Energies= | -3600.035639 |             |             | H | 1.61355000  | -2.02676400 | 4.65586500  |
| C                                            | -0.66836600  | 3.30092500  | 1.04277000  | C | 3.17584000  | 0.33315200  | -0.91319000 |
| C                                            | -0.17942800  | 4.72844900  | 0.73068100  | C | 2.77939700  | 0.88659400  | -2.30322500 |
| C                                            | -2.98774800  | 3.88921300  | 0.28678100  | C | 3.84833100  | 1.45249500  | -0.08985400 |
| C                                            | -1.32800200  | 5.74070900  | 0.84381600  | H | 3.91135200  | -0.47308500 | -1.05042300 |
| C                                            | -2.51928800  | 5.32652000  | -0.03134900 | C | 3.98278900  | 1.47930100  | -3.05184300 |
| H                                            | -0.95077200  | 3.26297700  | 2.10944600  | H | 2.02024400  | 1.66734000  | -2.15951200 |
| H                                            | 0.22148600   | 4.74903000  | -0.29245500 | H | 2.30420800  | 0.11132100  | -2.91180500 |
| H                                            | -1.65455700  | 5.79710200  | 1.89282300  | C | 5.04832200  | 2.06312000  | -0.83573200 |
| H                                            | -3.37926800  | 3.88187000  | 1.31824800  | H | 3.11300600  | 2.24229700  | 0.11964400  |
| H                                            | -3.34979400  | 6.03227600  | 0.10093100  | H | 4.18932000  | 1.07324000  | 0.87847600  |
| H                                            | 0.14891400   | 2.58101000  | 0.90513400  | C | 4.66336400  | 2.57989700  | -2.22790100 |
| H                                            | 0.64319000   | 5.00883200  | 1.40221900  | H | 3.65576600  | 1.87311000  | -4.02137600 |
| H                                            | -3.82722400  | 3.62964000  | -0.36324200 | H | 4.70866200  | 0.68193100  | -3.26736200 |
| H                                            | -0.98302700  | 6.74635700  | 0.57117800  | H | 5.47923700  | 2.87120900  | -0.23263000 |
| H                                            | -2.22584200  | 5.37705500  | -1.08877700 | H | 5.83214400  | 1.29869000  | -0.93646500 |
| C                                            | -1.84595700  | 2.88851700  | 0.17250600  | H | 5.54919100  | 2.95966700  | -2.75048600 |
| C                                            | -1.78897000  | 1.78703600  | -0.61732500 | H | 3.97353100  | 3.42868300  | -2.12150400 |
| C                                            | -2.97346300  | 1.39889500  | -1.49954100 | C | 1.81244800  | -2.25851300 | -0.50286600 |
| H                                            | -3.91124100  | 1.90995900  | -1.23474500 | C | 0.66138600  | -3.07254600 | 0.12683800  |
| H                                            | -2.76554000  | 1.70839700  | -2.53872100 | C | 1.88522100  | -2.50789100 | -2.02495200 |
| Cu                                           | -0.21795000  | 0.67050400  | -0.51354200 | H | 2.76118900  | -2.59889200 | -0.06322500 |
| Si                                           | -3.32442900  | -0.45769900 | -1.65399600 | C | 0.75775000  | -4.56803800 | -0.21623900 |
| C                                            | -4.99648700  | -0.71972400 | -2.51399200 | H | -0.30110200 | -2.67989000 | -0.22466600 |
| H                                            | -5.81675900  | -0.30276200 | -1.91980900 | H | 0.66123800  | -2.95421700 | 1.21397700  |
| H                                            | -5.01397500  | -0.23095300 | -3.49512400 | C | 1.98049000  | -4.00787200 | -2.35275100 |
| H                                            | -5.20933400  | -1.78331300 | -2.66916100 | H | 0.99139500  | -2.09145700 | -2.50695000 |
| P                                            | 1.65867100   | -0.43374300 | -0.08679700 | H | 2.74887900  | -1.99246600 | -2.45670600 |
| C                                            | 1.96131600   | -0.29817100 | 1.76367100  | C | 0.82497000  | -4.80190400 | -1.73056100 |
| C                                            | 0.64753200   | -0.38474800 | 2.57433000  | H | -0.10048500 | -5.09488800 | 0.21687900  |
| C                                            | 3.04389700   | -1.22145000 | 2.35558100  | H | 1.65604000  | -4.99209900 | 0.25538300  |
| H                                            | 2.31064300   | 0.73755000  | 1.87056600  | H | 1.99785900  | -4.14266900 | -3.44085100 |
| C                                            | 0.89728500   | -0.07547000 | 4.05865100  | H | 2.93536400  | -4.40084600 | -1.97500800 |



|                                                           |             |             |             |   |             |             |             |
|-----------------------------------------------------------|-------------|-------------|-------------|---|-------------|-------------|-------------|
| H                                                         | 0.93567300  | -5.87074100 | -1.94867500 | H | -1.92255300 | 2.14942900  | -2.21550300 |
| H                                                         | -0.12169300 | -4.48386500 | -2.18931400 | H | -4.01652800 | 3.99580800  | -0.95346500 |
| C                                                         | -1.96275200 | -1.23713900 | -2.72320500 | H | -1.11137200 | 4.61915300  | -1.70941100 |
| H                                                         | -2.03211300 | -0.89228200 | -3.76126200 | H | -0.33310700 | 2.54698300  | -0.24977800 |
| H                                                         | -0.99083900 | -0.91542200 | -2.33116600 | H | -0.66230100 | 4.80763500  | 0.71044800  |
| H                                                         | -1.98902100 | -2.33190100 | -2.72716500 | H | -3.61244400 | 1.74899700  | -1.91874000 |
| C                                                         | -3.37195200 | -1.34943600 | 0.02186300  | H | -3.37342500 | 4.12636200  | -2.58563900 |
| C                                                         | -3.48456300 | -2.75238000 | 0.08128500  | H | -0.90264700 | 2.42797300  | 1.40284900  |
| C                                                         | -3.33799600 | -0.65172200 | 1.24395500  | H | -2.26334000 | 5.74750300  | -1.00594400 |
| C                                                         | -3.55896200 | -3.43128000 | 1.29917800  | H | -2.33997800 | 4.43742400  | 1.09278400  |
| H                                                         | -3.51857800 | -3.33196600 | -0.83966500 | C | -2.38713300 | 1.88071500  | -0.11049000 |
| C                                                         | -3.41622900 | -1.32404800 | 2.46674000  | H | -3.25402400 | 2.08104100  | 0.53052200  |
| H                                                         | -3.22713800 | 0.42880900  | 1.23698100  | C | -3.34534800 | -3.14131800 | -3.13040600 |
| C                                                         | -3.52573700 | -2.71545400 | 2.49799700  | C | -3.09127400 | -1.69922400 | -3.58444000 |
| H                                                         | -3.64781600 | -4.51473300 | 1.31352100  | C | -3.30492300 | -2.36981800 | -0.70243200 |
| H                                                         | -3.39158900 | -0.76005000 | 3.39587000  | C | -2.30589000 | -0.91921300 | -2.51898100 |
| H                                                         | -3.58713600 | -3.23890400 | 3.44859500  | C | -3.03155500 | -0.91200100 | -1.14960400 |
| <b>TS6B</b>                                               |             |             |             | H | -2.38244900 | -3.65929300 | -3.03031500 |
| Sum of electronic and thermal Free Energies= -3788.582699 |             |             |             | H | -4.05005800 | -1.19694400 | -3.78089000 |
| C                                                         | 1.79813600  | -1.78478400 | 2.28137400  | H | -1.32665000 | -1.39656000 | -2.39267100 |
| C                                                         | 2.35214700  | -3.01111700 | 3.03558400  | H | -2.35522300 | -2.87458600 | -0.48787100 |
| C                                                         | 4.01978700  | -1.42632700 | 1.17306200  | H | -3.92780900 | -3.68539300 | -3.88353800 |
| C                                                         | 3.86835000  | -2.90823400 | 3.24227100  | H | -2.53178600 | -1.68537400 | -4.52721000 |
| C                                                         | 4.59122300  | -2.65878700 | 1.91237300  | H | -3.88767200 | -2.38961300 | 0.22267500  |
| H                                                         | 1.95187900  | -0.89135900 | 2.90877800  | H | -2.11846600 | 0.09950300  | -2.86791200 |
| H                                                         | 2.11181600  | -3.90860400 | 2.45246400  | H | -3.99588500 | -0.39534700 | -1.26084700 |
| H                                                         | 4.08610600  | -2.07920100 | 3.93153000  | C | -4.07094300 | -3.15768200 | -1.78007300 |
| H                                                         | 4.20936200  | -0.53174400 | 1.78464200  | H | -4.21369300 | -4.18803900 | -1.43378700 |
| H                                                         | 5.66640100  | -2.51819600 | 2.07855200  | H | -5.07591900 | -2.72652400 | -1.90142100 |
| H                                                         | 0.72801200  | -1.90434000 | 2.12005200  | C | -3.90732600 | 1.21542400  | 3.95668700  |
| H                                                         | 1.83897400  | -3.11388100 | 3.99950000  | C | -4.70385300 | 0.90120300  | 2.68589000  |
| H                                                         | 4.55128800  | -1.27331500 | 0.23286200  | C | -1.88464800 | 0.01526700  | 3.00780700  |
| H                                                         | 4.25323800  | -3.81858800 | 3.71813500  | C | -4.21540800 | -0.39116800 | 2.00823100  |
| H                                                         | 4.48398200  | -3.54129400 | 1.26782200  | C | -2.68161200 | -0.49819800 | 1.77797300  |
| C                                                         | 2.52190500  | -1.55622200 | 0.96819500  | H | -4.07276000 | 0.42031200  | 4.69761500  |
| C                                                         | 1.88907400  | -1.49050600 | -0.24313100 | H | -4.62955700 | 1.75191300  | 1.99624000  |
| C                                                         | 2.65897900  | -1.28314400 | -1.53561600 | H | -4.49603500 | -1.23194400 | 2.65834700  |
| H                                                         | 3.64597100  | -1.76487100 | -1.50784400 | H | -1.94212400 | -0.77036400 | 3.77366000  |
| H                                                         | 2.10992200  | -1.80368300 | -2.32954400 | H | -2.44164700 | -1.56511000 | 1.70182100  |
| C                                                         | -2.76600500 | 2.32859000  | -1.53683000 | H | -4.26521700 | 2.14676900  | 4.41076000  |
| C                                                         | -3.11690800 | 3.82718800  | -1.56250100 | H | -5.77023500 | 0.79430700  | 2.91825600  |
| C                                                         | -1.20159600 | 2.73264600  | 0.39456100  | H | -0.82081900 | 0.10822700  | 2.76130200  |
| C                                                         | -1.96794300 | 4.69193200  | -1.02503000 | H | -4.76195800 | -0.54475900 | 1.07236000  |
| C                                                         | -1.53335900 | 4.23347500  | 0.37399800  | C | -2.41055200 | 1.31340000  | 3.63967600  |

|                                              |              |             |             |   |             |             |             |
|----------------------------------------------|--------------|-------------|-------------|---|-------------|-------------|-------------|
| H                                            | -1.83836100  | 1.52228700  | 4.55143600  | C | 2.10219600  | -1.24521600 | -0.83868700 |
| H                                            | -2.24464300  | 2.16728300  | 2.97162000  | C | 2.21989400  | 1.28238500  | -0.96141700 |
| P                                            | -2.00589800  | 0.04767600  | 0.10737900  | H | 2.41062300  | 1.26596300  | -2.04454100 |
| Cu                                           | 0.08773800   | -0.65248200 | -0.08517800 | H | 1.50589300  | 2.09843000  | -0.79136700 |
| Si                                           | 2.89860900   | 0.49814300  | -2.16192200 | C | -2.83161800 | 1.25891400  | 2.38247500  |
| C                                            | 1.24886400   | 1.14429400  | -2.84287000 | C | -3.37132200 | 1.13094200  | 3.81771800  |
| H                                            | 0.46786900   | 1.06689800  | -2.07790100 | C | -2.69998800 | -1.25781600 | 2.22329300  |
| H                                            | 1.31769500   | 2.19275200  | -3.15146000 | C | -2.87951300 | -0.15140100 | 4.50003500  |
| H                                            | 0.91969500   | 0.55178700  | -3.70384400 | C | -3.23689600 | -1.38253300 | 3.65878000  |
| C                                            | 0.49982400   | -2.84752400 | -0.51446100 | H | -1.74010800 | 1.36331600  | 2.41642900  |
| O                                            | 0.54985500   | -3.17888100 | -1.68412800 | H | -4.47091000 | 1.13311800  | 3.79397300  |
| O                                            | -0.10502400  | -3.16605400 | 0.50781900  | H | -1.78917700 | -0.10215500 | 4.62074200  |
| C                                            | 4.17837900   | 0.47666400  | -3.55685600 | H | -1.60349000 | -1.24164600 | 2.24887800  |
| H                                            | 3.86043400   | -0.21140700 | -4.34800200 | H | -2.83287700 | -2.29207700 | 4.11823200  |
| H                                            | 4.30614100   | 1.46539500  | -4.01078400 | H | -3.22629300 | 2.17777700  | 1.93856300  |
| H                                            | 5.15950100   | 0.13831100  | -3.20616400 | H | -3.06992000 | 2.01280300  | 4.39508500  |
| C                                            | 3.46111500   | 1.69046700  | -0.79855900 | H | -2.98866700 | -2.14389500 | 1.65335300  |
| C                                            | 2.63225800   | 1.94177000  | 0.31286600  | H | -3.30732300 | -0.23674000 | 5.50598900  |
| C                                            | 4.68679400   | 2.37743700  | -0.85599100 | H | -4.32996400 | -1.50348700 | 3.63242300  |
| C                                            | 3.00731900   | 2.83245500  | 1.31895300  | C | -3.20984100 | 0.02409900  | 1.52838600  |
| H                                            | 1.68758600   | 1.40996400  | 0.39661900  | H | -4.30659800 | -0.01752400 | 1.45627600  |
| C                                            | 5.07024400   | 3.27224900  | 0.14660200  | C | -2.67956100 | 4.46999400  | -2.27657100 |
| H                                            | 5.35739400   | 2.21611200  | -1.69627500 | C | -2.13340800 | 4.30625100  | -0.85259000 |
| C                                            | 4.23075800   | 3.50213500  | 1.23702500  | C | -3.54938900 | 2.07307000  | -2.19944900 |
| H                                            | 2.34881000   | 3.00358400  | 2.16678400  | C | -1.80546100 | 2.83884400  | -0.54291200 |
| H                                            | 6.02360700   | 3.78937100  | 0.07593100  | C | -3.03035000 | 1.91508900  | -0.75557000 |
| H                                            | 4.52662200   | 4.19728100  | 2.01810600  | H | -1.88589400 | 4.22809400  | -2.99755800 |
| <b>TS7B</b>                                  |              |             |             | H | -2.87673000 | 4.67321000  | -0.13039100 |
| Sum of electronic and thermal Free Energies= | -3788.580100 |             |             | H | -1.00225500 | 2.49764200  | -1.21144900 |
| C                                            | 1.49130600   | -2.54174000 | -0.34213600 | H | -2.78798100 | 1.71755800  | -2.90882400 |
| C                                            | 1.20494400   | -3.53537600 | -1.48561500 | H | -2.96343300 | 5.51236900  | -2.46299100 |
| C                                            | 3.31603600   | -1.47414500 | -1.72196100 | H | -1.23623400 | 4.91990700  | -0.71217700 |
| C                                            | 2.44935800   | -3.78210600 | -2.34800300 | H | -4.44565500 | 1.46626700  | -2.36373900 |
| C                                            | 3.01952900   | -2.45844700 | -2.87335800 | H | -1.40529000 | 2.74432500  | 0.46963800  |
| H                                            | 2.19916700   | -3.01243100 | 0.35778100  | H | -3.83613100 | 2.23525500  | -0.08191700 |
| H                                            | 0.40516600   | -3.13183900 | -2.12382900 | C | -3.87904600 | 3.54367200  | -2.51575000 |
| H                                            | 3.21363000   | -4.29025200 | -1.74285400 | H | -4.22590500 | 3.62379200  | -3.55289900 |
| H                                            | 4.11979100   | -1.89674400 | -1.10128100 | H | -4.71772900 | 3.86404700  | -1.88146500 |
| H                                            | 3.93509700   | -2.63711900 | -3.45028900 | C | -4.73443300 | -3.63277000 | -0.72012200 |
| H                                            | 0.58402100   | -2.34251000 | 0.23237000  | C | -5.38297400 | -2.32365500 | -0.24554100 |
| H                                            | 0.83070800   | -4.47989200 | -1.07139800 | C | -2.81085100 | -2.31770000 | -1.72581800 |
| H                                            | 3.70155800   | -0.53466000 | -2.12424900 | C | -5.02315700 | -1.14558100 | -1.16598100 |
| H                                            | 2.21126500   | -4.45463300 | -3.18151100 | C | -3.50430700 | -0.96680400 | -1.40776200 |
| H                                            | 2.29662500   | -2.00096200 | -3.56341900 | H | -5.14358700 | -3.90123400 | -1.70477400 |

|                                              |              |             |             |   |             |             |             |
|----------------------------------------------|--------------|-------------|-------------|---|-------------|-------------|-------------|
| H                                            | -5.06598200  | -2.11285100 | 0.78240900  | H | -3.90601800 | 2.46499400  | 1.99378700  |
| H                                            | -5.48939000  | -1.32786300 | -2.14490800 | H | -3.00892600 | 4.67496500  | 0.07291100  |
| H                                            | -3.08432600  | -2.57684200 | -2.75851000 | H | -5.73532600 | 4.28432100  | 1.41821900  |
| H                                            | -3.39307400  | -0.37726100 | -2.32313100 | H | -5.85382000 | 1.84008800  | 0.41068100  |
| H                                            | -4.99610600  | -4.45212500 | -0.04067300 | H | -6.61835800 | 3.82906700  | -0.85024000 |
| H                                            | -6.47368000  | -2.43165300 | -0.21382400 | H | -2.28994900 | 2.64219700  | 1.33843600  |
| H                                            | -1.72326300  | -2.18272300 | -1.72207400 | H | -3.35676700 | 4.86772900  | 1.78916500  |
| H                                            | -5.47025400  | -0.21795000 | -0.78885800 | H | -5.55376600 | 1.62449200  | -1.30243200 |
| C                                            | -3.20902800  | -3.49543600 | -0.82706000 | H | -5.29166500 | 5.61034900  | 0.34831600  |
| H                                            | -2.77276100  | -4.41587800 | -1.23225900 | H | -5.01472900 | 4.03857400  | -1.55026400 |
| H                                            | -2.77787700  | -3.37314000 | 0.17297000  | C | -3.78263700 | 1.96877800  | -0.07988300 |
| P                                            | -2.55466100  | 0.15987600  | -0.23268200 | C | -3.35319600 | 0.29510000  | -1.95657800 |
| Cu                                           | -0.35343600  | -0.03623300 | -0.32886100 | H | -4.30875300 | 0.60748500  | -2.38732100 |
| Si                                           | 3.84590900   | 1.92663800  | -0.14535800 | H | -2.59214800 | 0.41614000  | -2.73674100 |
| C                                            | 4.97414800   | 0.54665300  | 0.50446400  | C | 4.26822600  | -1.08566500 | -1.99166600 |
| C                                            | 4.55986800   | -0.32087500 | 1.53529200  | C | 4.89775900  | -2.32490000 | -2.65173200 |
| C                                            | 6.27384700   | 0.36815100  | -0.00520000 | C | 2.73246300  | -2.57705200 | -0.66733200 |
| C                                            | 5.40197200   | -1.32049200 | 2.02579000  | C | 3.91339400  | -3.49861500 | -2.72091400 |
| H                                            | 3.56327000   | -0.23403300 | 1.95747000  | C | 3.34923100  | -3.81879000 | -1.33145500 |
| C                                            | 7.12266000   | -0.62806000 | 0.48311000  | H | 3.44006600  | -0.72708900 | -2.61844100 |
| H                                            | 6.63628800   | 1.01601300  | -0.79921600 | H | 5.78467900  | -2.62613500 | -2.07620700 |
| C                                            | 6.68668100   | -1.47766800 | 1.50053800  | H | 3.08687700  | -3.23957700 | -3.39730400 |
| H                                            | 5.05332400   | -1.97648000 | 2.81911200  | H | 1.85718500  | -2.24507900 | -1.24266500 |
| H                                            | 8.12173500   | -0.74008600 | 0.06948400  | H | 2.59427600  | -4.61090400 | -1.39629100 |
| H                                            | 7.34292000   | -2.25504300 | 1.88314800  | H | 5.01204300  | -0.28449900 | -1.95956800 |
| C                                            | 3.47658300   | 3.12906200  | 1.26666700  | H | 5.25312800  | -2.06168000 | -3.65506100 |
| H                                            | 4.40827400   | 3.53735200  | 1.67417700  | H | 2.36225400  | -2.84232000 | 0.32500000  |
| H                                            | 2.86688300   | 3.96833400  | 0.91229100  | H | 4.40220600  | -4.38169600 | -3.14874100 |
| H                                            | 2.92191200   | 2.64566600  | 2.07383600  | H | 4.15484800  | -4.20772600 | -0.69228700 |
| C                                            | 4.76661300   | 2.88632400  | -1.50284300 | C | 3.73270500  | -1.40487500 | -0.57819400 |
| H                                            | 4.12360900   | 3.67841300  | -1.90433500 | H | 4.58546500  | -1.70530400 | 0.04680200  |
| H                                            | 5.67393100   | 3.36677500  | -1.12052700 | C | 4.85499500  | 4.37415600  | -0.55493400 |
| H                                            | 5.05507400   | 2.24426900  | -2.34258000 | C | 4.67299700  | 3.39388300  | -1.72034500 |
| C                                            | 1.58945800   | -0.02720200 | -0.51741100 | C | 4.32818200  | 2.49559500  | 1.08585600  |
| C                                            | 0.88536000   | 0.25388000  | 1.49360500  | C | 3.71156600  | 2.25434900  | -1.35178100 |
| O                                            | 0.92729700   | -0.79098300 | 2.10706300  | C | 4.15909200  | 1.49601000  | -0.07760200 |
| O                                            | 0.76883900   | 1.45709200  | 1.63556500  | H | 3.90366300  | 4.89003500  | -0.36408500 |
| <b>10B</b>                                   |              |             |             | H | 5.64940800  | 2.97056300  | -1.99693900 |
| Sum of electronic and thermal Free Energies= | -3788.632775 |             |             | H | 2.70624500  | 2.65986800  | -1.17342600 |
| C                                            | -3.34286500  | 2.80283500  | 1.10902800  | H | 3.35130100  | 2.92544000  | 1.34936200  |
| C                                            | -3.63878900  | 4.30174300  | 0.89232800  | H | 5.58493500  | 5.14932900  | -0.81566900 |
| C                                            | -5.23949300  | 2.19998600  | -0.42936700 | H | 4.29814600  | 3.91675000  | -2.60792300 |
| C                                            | -5.11425800  | 4.54629600  | 0.54920900  | H | 4.70579400  | 1.99096400  | 1.98060800  |
| C                                            | -5.54733700  | 3.69635800  | -0.65240900 | H | 3.61040500  | 1.56627400  | -2.19610100 |

|    |             |             |             |                                              |              |             |             |
|----|-------------|-------------|-------------|----------------------------------------------|--------------|-------------|-------------|
| H  | 5.14133200  | 1.04031600  | -0.26377800 | C                                            | -1.52078700  | 0.94259200  | -0.36019300 |
| C  | 5.29420300  | 3.63525100  | 0.71521900  | O                                            | -1.20001500  | 0.68028500  | 0.82065200  |
| H  | 5.37380300  | 4.33251900  | 1.55756400  | O                                            | -0.65802300  | 0.99372600  | -1.32493100 |
| H  | 6.29864000  | 3.21545200  | 0.56208400  | <b>11B</b>                                   |              |             |             |
| C  | 2.73124100  | -2.69803400 | 3.66742000  | Sum of electronic and thermal Free Energies= | -4643.444936 |             |             |
| C  | 4.03032900  | -2.30439400 | 2.94934400  | C                                            | -1.52055600  | 0.53083600  | -0.27798000 |
| C  | 1.57535100  | -0.64557200 | 2.70949600  | O                                            | -0.50659600  | 0.17759500  | 0.37691600  |
| C  | 4.14400000  | -0.77966300 | 2.78196700  | O                                            | -1.46709200  | 1.33660000  | -1.29237900 |
| C  | 2.91216000  | -0.11797100 | 2.11861900  | B                                            | -0.28025400  | 2.26604800  | -1.65461000 |
| H  | 2.74660100  | -2.28785100 | 4.68753000  | O                                            | 0.97610500   | 1.45905400  | -1.82100600 |
| H  | 4.06763300  | -2.80075600 | 1.97172500  | O                                            | -0.57951800  | 2.76826900  | -2.97939500 |
| H  | 4.25032300  | -0.34035600 | 3.78429400  | C                                            | 1.13537200   | 1.19819600  | -3.22128400 |
| H  | 1.46518100  | -0.16739700 | 3.69322400  | C                                            | 0.45155400   | 2.40661200  | -3.87232800 |
| H  | 2.92894500  | 0.94142500  | 2.39320800  | H                                            | 1.17202500   | 3.23146700  | -4.00001100 |
| H  | 2.67227900  | -3.78787200 | 3.77132400  | H                                            | 0.03841800   | 2.16456600  | -4.86023200 |
| H  | 4.90005700  | -2.66810700 | 3.50973600  | H                                            | 2.20127800   | 1.11245900  | -3.45970000 |
| H  | 0.73158800  | -0.29476500 | 2.10626300  | H                                            | 0.63412500   | 0.25908300  | -3.49631900 |
| H  | 5.06477300  | -0.52306100 | 2.24342500  | C                                            | -2.44594300  | -0.01322900 | 2.55981100  |
| C  | 1.49908000  | -2.16254500 | 2.92467000  | C                                            | -3.15066000  | 0.95809200  | 3.53428900  |
| H  | 0.58679300  | -2.39363300 | 3.48639400  | C                                            | -4.67298000  | -0.73858000 | 1.67273600  |
| H  | 1.39501700  | -2.68079900 | 1.96441000  | C                                            | -4.56443000  | 0.48746200  | 3.89582700  |
| P  | 2.93667800  | 0.08787300  | 0.24506200  | C                                            | -5.39529200  | 0.23230700  | 2.63254800  |
| Cu | 0.98322100  | 0.56360200  | -0.49616900 | H                                            | -2.31214200  | -0.98101700 | 3.06920000  |
| Si | -3.46983400 | -1.58144000 | -1.58393500 | H                                            | -3.20138700  | 1.95016600  | 3.06697100  |
| C  | -4.54345700 | -1.89641800 | -0.05703900 | H                                            | -4.50045600  | -0.44231100 | 4.48010500  |
| C  | -4.13707700 | -1.43732900 | 1.21388900  | H                                            | -4.56312300  | -1.71001800 | 2.17773500  |
| C  | -5.76205600 | -2.59500300 | -0.13740600 | H                                            | -6.37985400  | -0.17469700 | 2.89321000  |
| C  | -4.91854000 | -1.66983400 | 2.34706400  | H                                            | -1.45302300  | 0.35289500  | 2.31331000  |
| H  | -3.20760900 | -0.88313300 | 1.32260400  | H                                            | -2.54029400  | 1.06651300  | 4.43942700  |
| C  | -6.54622000 | -2.82988500 | 0.99468000  | H                                            | -5.28932400  | -0.92649000 | 0.79328700  |
| H  | -6.11039200 | -2.96653800 | -1.09820900 | H                                            | -5.06138700  | 1.22587800  | 4.53682700  |
| C  | -6.12465000 | -2.36653900 | 2.24127600  | H                                            | -5.57088900  | 1.18338400  | 2.11269900  |
| H  | -4.58506900 | -1.30484900 | 3.31521000  | C                                            | -3.28333300  | -0.24540200 | 1.31681700  |
| H  | -7.48314800 | -3.37345800 | 0.90268200  | C                                            | -2.89885700  | 0.02395300  | 0.04219800  |
| H  | -6.73143100 | -2.54672400 | 3.12496400  | C                                            | -3.80151600  | -0.10780900 | -1.17059900 |
| C  | -1.73787700 | -2.29587800 | -1.28740600 | H                                            | -3.60613600  | 0.73635100  | -1.83939900 |
| H  | -1.78973500 | -3.37525000 | -1.10656100 | H                                            | -4.85694200  | -0.04371400 | -0.89328200 |
| H  | -1.09645700 | -2.12449200 | -2.15926200 | Si                                           | -3.56613100  | -1.69422400 | -2.21138700 |
| H  | -1.25770400 | -1.82864700 | -0.42239400 | C                                            | -1.77819600  | -1.81046800 | -2.82538600 |
| C  | -4.22879400 | -2.42646000 | -3.10206500 | H                                            | -1.50567600  | -0.90417700 | -3.37575200 |
| H  | -3.60892200 | -2.23983500 | -3.98643200 | H                                            | -1.07073200  | -1.92073700 | -1.99638200 |
| H  | -4.29924800 | -3.51205400 | -2.97278300 | H                                            | -1.64897000  | -2.67113200 | -3.49047700 |
| H  | -5.23355800 | -2.04963300 | -3.32235500 | C                                            | -4.73479000  | -1.59225400 | -3.69750700 |
| C  | -2.96127000 | 1.14372500  | -0.76645700 | H                                            | -4.49405000  | -0.71410700 | -4.30687400 |

|   |             |             |             |                                              |              |             |             |
|---|-------------|-------------|-------------|----------------------------------------------|--------------|-------------|-------------|
| H | -4.65071200 | -2.47510200 | -4.34042400 | C                                            | 6.41134900   | 2.12329900  | 0.85042300  |
| H | -5.78264500 | -1.49919400 | -3.39181800 | H                                            | 6.65472800   | 2.82221100  | 1.65948600  |
| C | -3.96631300 | -3.23888000 | -1.18756900 | H                                            | 7.27318900   | 1.44748300  | 0.75337900  |
| C | -5.11702100 | -4.01072400 | -1.43089600 | C                                            | 2.48739800   | -3.27967400 | 4.04351800  |
| C | -3.11605100 | -3.65692900 | -0.14422800 | C                                            | 3.79584100   | -3.23329100 | 3.24294000  |
| C | -5.41136900 | -5.14480300 | -0.67011100 | C                                            | 1.78411100   | -1.06104400 | 3.01543600  |
| H | -5.79771200 | -3.72651200 | -2.22942200 | C                                            | 4.25798500   | -1.78579600 | 3.00537900  |
| C | -3.40457100 | -4.78730700 | 0.62177300  | C                                            | 3.18479700   | -0.86490300 | 2.37261200  |
| H | -2.21744400 | -3.08740900 | 0.08007600  | H                                            | 2.65486000   | -2.83520700 | 5.03526600  |
| C | -4.55499500 | -5.53517500 | 0.35982100  | H                                            | 3.64937200   | -3.75086800 | 2.28658200  |
| H | -6.30729500 | -5.72249100 | -0.88196400 | H                                            | 4.52566800   | -1.35789400 | 3.98226800  |
| H | -2.73213300 | -5.08658400 | 1.42167700  | H                                            | 1.79865600   | -0.51690400 | 3.97009100  |
| H | -4.78056300 | -6.41671000 | 0.95391600  | H                                            | 3.45653800   | 0.16305100  | 2.63259500  |
| C | 4.12469900  | -2.24967000 | -1.71216400 | H                                            | 2.18300000   | -4.31891700 | 4.21465600  |
| C | 4.37267500  | -3.63913900 | -2.32538600 | H                                            | 4.58673600   | -3.77973300 | 3.77062300  |
| C | 2.24075500  | -3.20392500 | -0.34014800 | H                                            | 1.02605600   | -0.57450000 | 2.39408100  |
| C | 3.09698700  | -4.48922200 | -2.35460000 | H                                            | 5.18110800   | -1.77492100 | 2.41286400  |
| C | 2.47946900  | -4.59249900 | -0.95466300 | C                                            | 1.37549300   | -2.50924700 | 3.31946500  |
| H | 3.43208800  | -1.69133900 | -2.35731100 | H                                            | 0.46218500   | -2.49706500 | 3.92596800  |
| H | 5.14231600  | -4.15862100 | -1.73692700 | H                                            | 1.11209600   | -3.03671400 | 2.39548400  |
| H | 2.36957100  | -4.02905200 | -3.03799100 | P                                            | 3.18603600   | -0.67583800 | 0.49344100  |
| H | 1.48736700  | -2.66757800 | -0.93374600 | Cu                                           | 1.41786500   | 0.28316300  | -0.23694900 |
| H | 1.53321700  | -5.14474500 | -0.99109300 | Si                                           | -0.06727300  | 3.76703400  | -0.24807400 |
| H | 5.06697000  | -1.69465400 | -1.70215300 | C                                            | 0.88122700   | 5.22600400  | -1.02937300 |
| H | 4.78054400  | -3.52365600 | -3.33668100 | H                                            | 0.98409400   | 6.06854700  | -0.33625100 |
| H | 1.81844800  | -3.31278200 | 0.66083100  | H                                            | 1.88872100   | 4.91777900  | -1.33451200 |
| H | 3.31246700  | -5.48731200 | -2.75357500 | H                                            | 0.36266300   | 5.58547500  | -1.92406000 |
| H | 3.15163200  | -5.16742200 | -0.30160800 | C                                            | 0.90992000   | 3.27716900  | 1.32286500  |
| C | 3.52708200  | -2.35261100 | -0.29246600 | H                                            | 0.43977100   | 2.44771400  | 1.86082300  |
| H | 4.26589600  | -2.86012300 | 0.34308100  | H                                            | 1.92370800   | 2.96205800  | 1.04342800  |
| C | 6.20847800  | 2.87788800  | -0.46862600 | H                                            | 1.01934800   | 4.11629500  | 2.02010100  |
| C | 5.79742000  | 1.91303600  | -1.58694800 | C                                            | -1.78022000  | 4.40200200  | 0.29805600  |
| C | 5.17237400  | 1.30007400  | 1.24457900  | C                                            | -2.79766200  | 4.56852100  | -0.66299300 |
| C | 4.56145900  | 1.08906400  | -1.19673700 | C                                            | -2.10071100  | 4.70946000  | 1.63292400  |
| C | 4.75931800  | 0.31511000  | 0.12973500  | C                                            | -4.06702100  | 5.02934300  | -0.31019100 |
| H | 5.42453700  | 3.63670700  | -0.33722700 | H                                            | -2.59365000  | 4.32470200  | -1.70349100 |
| H | 6.63363200  | 1.23336800  | -1.80658100 | C                                            | -3.37149700  | 5.16590900  | 1.99584500  |
| H | 3.68914300  | 1.74577900  | -1.08658600 | H                                            | -1.34783400  | 4.59312300  | 2.40917200  |
| H | 4.33947100  | 1.98564400  | 1.45739700  | C                                            | -4.35883200  | 5.32837600  | 1.02282200  |
| H | 7.12277000  | 3.41708500  | -0.74309600 | H                                            | -4.83159300  | 5.14981100  | -1.07386300 |
| H | 5.59304000  | 2.46324800  | -2.51302800 | H                                            | -3.58880500  | 5.39709000  | 3.03600200  |
| H | 5.38953300  | 0.76554900  | 2.17455800  | H                                            | -5.34788100  | 5.68359400  | 1.30073300  |
| H | 4.30954200  | 0.40025600  | -2.00792000 | <b>TS8B</b>                                  |              |             |             |
| H | 5.58155100  | -0.40360700 | 0.00274200  | Sum of electronic and thermal Free Energies= | -4643.425931 |             |             |

|    |             |             |             |   |             |             |             |
|----|-------------|-------------|-------------|---|-------------|-------------|-------------|
| C  | -1.41536300 | 0.69747400  | -0.14446300 | C | -7.54266700 | -2.73363800 | -0.68555000 |
| O  | -0.53384600 | 0.15342300  | 0.56203100  | H | -6.99232800 | -1.24155700 | -2.11926900 |
| O  | -1.12484300 | 1.35295800  | -1.23418400 | C | -5.73274900 | -3.75915200 | 0.53693900  |
| B  | 0.29212500  | 1.58420400  | -1.71505400 | H | -3.75987500 | -3.07060200 | 0.06412200  |
| O  | 0.89979800  | 0.33830600  | -2.20571500 | C | -7.09908400 | -3.64575500 | 0.27359400  |
| O  | 0.20660800  | 2.47850100  | -2.84403500 | H | -8.60420200 | -2.64216600 | -0.90018500 |
| C  | 1.00341200  | 0.43210100  | -3.62828900 | H | -5.37890300 | -4.47036500 | 1.27886600  |
| C  | 0.98674400  | 1.94195400  | -3.89681600 | H | -7.81256300 | -4.26567600 | 0.80974000  |
| H  | 2.00807400  | 2.35398700  | -3.87829700 | C | 3.19296400  | -2.69649800 | -1.80909300 |
| H  | 0.53331600  | 2.19623400  | -4.86222100 | C | 2.91660000  | -4.04657900 | -2.49332300 |
| H  | 1.92216500  | -0.05864900 | -3.97084200 | C | 1.23576000  | -3.07639600 | -0.27893900 |
| H  | 0.14611600  | -0.06770500 | -4.10320200 | C | 1.43464600  | -4.43334200 | -2.41695200 |
| C  | -2.49963800 | 0.49719400  | 2.69197600  | C | 0.94384300  | -4.42091700 | -0.96375900 |
| C  | -2.94769600 | 1.62566600  | 3.64888900  | H | 2.65465700  | -1.90403600 | -2.34435500 |
| C  | -4.82235800 | 0.37859400  | 1.75720700  | H | 3.52254500  | -4.82628600 | -2.00962400 |
| C  | -4.44250700 | 1.54522000  | 3.98082700  | H | 0.84257100  | -3.71665700 | -3.00251100 |
| C  | -5.28501900 | 1.51031600  | 2.70006600  | H | 0.66501300  | -2.27843200 | -0.76941100 |
| H  | -2.63133400 | -0.46830400 | 3.20546200  | H | -0.13229800 | -4.62644900 | -0.92184900 |
| H  | -2.72764500 | 2.59206500  | 3.17660400  | H | 4.26073900  | -2.47306000 | -1.88858500 |
| H  | -4.63704400 | 0.63406400  | 4.56514300  | H | 3.24738900  | -4.00020900 | -3.53800900 |
| H  | -4.98393400 | -0.58380600 | 2.26587600  | H | 0.88906400  | -3.11105600 | 0.75609200  |
| H  | -6.34688300 | 1.37663200  | 2.93934900  | H | 1.27271600  | -5.41923100 | -2.86883100 |
| H  | -1.44134900 | 0.59160900  | 2.46512000  | H | 1.43813400  | -5.22934800 | -0.40554000 |
| H  | -2.34851700 | 1.57873900  | 4.56665800  | C | 2.73264200  | -2.70541100 | -0.33419100 |
| H  | -5.44564100 | 0.35065300  | 0.86369200  | H | 3.31771400  | -3.46963700 | 0.19655300  |
| H  | -4.74048500 | 2.39128500  | 4.61221100  | C | 7.13345200  | 1.13367500  | -0.63634000 |
| H  | -5.19544900 | 2.47135200  | 2.17650400  | C | 6.24731300  | 0.52131700  | -1.72815200 |
| C  | -3.34434100 | 0.48293400  | 1.43265200  | C | 5.70626300  | -0.02179200 | 1.13763800  |
| C  | -2.88040500 | 0.62244800  | 0.16264200  | C | 4.82637300  | 0.25289400  | -1.20810000 |
| C  | -3.76722500 | 0.72257200  | -1.06596200 | C | 4.82646200  | -0.65931400 | 0.04104300  |
| H  | -3.31876300 | 1.43957500  | -1.75932300 | H | 6.75595800  | 2.13450600  | -0.38428600 |
| H  | -4.75628400 | 1.11453100  | -0.81496900 | H | 6.69365400  | -0.42158100 | -2.07605800 |
| Si | -4.00271100 | -0.91384000 | -2.03281700 | H | 4.35574900  | 1.20680500  | -0.93841500 |
| C  | -2.35268300 | -1.82305900 | -2.20481000 | H | 5.25363900  | 0.92095900  | 1.47552500  |
| H  | -1.59347900 | -1.17241700 | -2.65006400 | H | 8.15807300  | 1.26890000  | -1.00236800 |
| H  | -1.96479300 | -2.14245900 | -1.23174200 | H | 6.20095800  | 1.18393400  | -2.60054600 |
| H  | -2.45830900 | -2.71425500 | -2.83302100 | H | 5.77543200  | -0.67279500 | 2.01424900  |
| C  | -4.68299700 | -0.48485300 | -3.74726500 | H | 4.20913700  | -0.17216200 | -2.00414800 |
| H  | -3.95112900 | 0.10987100  | -4.30502600 | H | 5.29327600  | -1.61716900 | -0.22864700 |
| H  | -4.89957500 | -1.38533100 | -4.33186700 | C | 7.13052700  | 0.25880700  | 0.62332600  |
| H  | -5.60414500 | 0.10545900  | -3.69077800 | H | 7.71844800  | 0.73075900  | 1.41968700  |
| C  | -5.23889500 | -2.03152800 | -1.12474500 | H | 7.62236400  | -0.69879900 | 0.40015500  |
| C  | -6.62184400 | -1.94068600 | -1.37302900 | C | 1.81220600  | -3.49585600 | 4.04139600  |
| C  | -4.81887800 | -2.96244200 | -0.15574400 | C | 2.98459400  | -3.83662500 | 3.11168900  |

|                                              |              |             |             |   |            |             |             |
|----------------------------------------------|--------------|-------------|-------------|---|------------|-------------|-------------|
| C                                            | 1.84754300   | -1.09833500 | 3.19983200  | H | 3.79249000 | -0.66445500 | -2.12972600 |
| C                                            | 3.89601600   | -2.61867300 | 2.88360400  | H | 4.22508400 | -3.53298200 | -1.15170000 |
| C                                            | 3.15570400   | -1.34607900 | 2.40093700  | H | 3.19760900 | -2.56189800 | -3.87259000 |
| H                                            | 2.20443900   | -3.21719500 | 5.03023100  | H | 1.25758900 | -1.19695700 | -2.63430600 |
| H                                            | 2.58994400   | -4.20282200 | 2.15614000  | H | 1.02726700 | -3.58198000 | -3.24169000 |
| H                                            | 4.37742700   | -2.37779100 | 3.84260400  | H | 4.47369800 | -1.12928600 | -0.57920200 |
| H                                            | 2.14706300   | -0.67851600 | 4.17058600  | H | 5.17172900 | -2.70037100 | -2.37879000 |
| H                                            | 3.79078900   | -0.49057600 | 2.65244300  | H | 0.31859700 | -2.03132100 | -1.41051000 |
| H                                            | 1.18003400   | -4.37848700 | 4.19402800  | H | 3.45698300 | -4.23676400 | -3.40214000 |
| H                                            | 3.58030500   | -4.65535600 | 3.53298200  | H | 1.67771100 | -4.08009800 | -1.68521300 |
| H                                            | 1.25188400   | -0.32780300 | 2.70005800  | C | 2.32260600 | -1.49432700 | -0.76060600 |
| H                                            | 4.71039400   | -2.87842700 | 2.19680100  | H | 2.31992600 | -2.26767100 | 0.01664500  |
| C                                            | 0.98262800   | -2.33531800 | 3.47634000  | C | 2.94317900 | 4.24038200  | -1.67488100 |
| H                                            | 0.18566500   | -2.05979600 | 4.17708600  | C | 3.00362100 | 2.99824300  | -2.57295300 |
| H                                            | 0.47610600   | -2.65719300 | 2.55986900  | C | 2.65958500 | 2.73581600  | 0.36409900  |
| P                                            | 3.03980100   | -1.05973200 | 0.53601000  | C | 2.22492500 | 1.82429300  | -1.95829700 |
| Cu                                           | 1.43141800   | 0.33119200  | 0.01312800  | C | 2.72434600 | 1.48167600  | -0.53560600 |
| Si                                           | 1.33712900   | 2.91901100  | -0.27807500 | H | 1.90701500 | 4.60343100  | -1.62854800 |
| C                                            | 2.62967400   | 3.85203800  | -1.32085800 | H | 4.05248800 | 2.70216000  | -2.71749300 |
| H                                            | 3.06677400   | 4.68208000  | -0.75436200 | H | 1.16003400 | 2.08865800  | -1.90334400 |
| H                                            | 3.44901400   | 3.19204400  | -1.62854900 | H | 1.61225800 | 3.02280000  | 0.52392300  |
| H                                            | 2.17621200   | 4.26235200  | -2.22684100 | H | 3.54067100 | 5.05251700  | -2.10541300 |
| C                                            | 2.24516400   | 2.67263000  | 1.41160900  | H | 2.60321100 | 3.22302600  | -3.56856700 |
| H                                            | 1.70549600   | 2.06843100  | 2.14756100  | H | 3.07479100 | 2.52133700  | 1.35350300  |
| H                                            | 3.23727500   | 2.23157500  | 1.27684900  | H | 2.29068200 | 0.95152800  | -2.61697300 |
| H                                            | 2.39542200   | 3.66540700  | 1.85542300  | H | 3.77405700 | 1.16683900  | -0.60520300 |
| C                                            | -0.08284200  | 4.12306200  | 0.15273500  | C | 3.42996300 | 3.91419200  | -0.25679100 |
| C                                            | -0.78580200  | 4.81385200  | -0.85512000 | H | 3.33434700 | 4.79236000  | 0.39228500  |
| C                                            | -0.47324900  | 4.36272300  | 1.48341400  | H | 4.50077600 | 3.66658100  | -0.29080000 |
| C                                            | -1.81408700  | 5.70546500  | -0.54724900 | C | 3.35336300 | -2.60622400 | 3.25596200  |
| H                                            | -0.53532600  | 4.63309900  | -1.89622300 | C | 4.24213700 | -1.77389800 | 2.32139100  |
| C                                            | -1.50689800  | 5.24975900  | 1.79905300  | C | 1.40312100 | -1.05058500 | 2.80354100  |
| H                                            | 0.03648700   | 3.85401700  | 2.29706300  | C | 3.79117500 | -0.30382500 | 2.26105300  |
| C                                            | -2.17925600  | 5.92818100  | 0.78243900  | C | 2.28699200 | -0.09417100 | 1.95748500  |
| H                                            | -2.33469600  | 6.22581700  | -1.34753200 | H | 3.46485600 | -2.23715300 | 4.28555100  |
| H                                            | -1.77937500  | 5.41530600  | 2.83873300  | H | 4.22667900 | -2.22261600 | 1.32105100  |
| H                                            | -2.97994500  | 6.62283800  | 1.02296800  | H | 3.98035500 | 0.14264800  | 3.24796300  |
| <b>TS1B<sup>s</sup></b>                      |              |             |             | H | 1.42035600 | -0.66278100 | 3.83114400  |
| Sum of electronic and thermal Free Energies= | -4002.284741 |             |             | H | 2.01889200 | 0.91222300  | 2.29559900  |
| C                                            | 3.75058200   | -1.42916900 | -1.34428800 | H | 3.68467200 | -3.65146000 | 3.26169100  |
| C                                            | 4.16496800   | -2.78127900 | -1.95169900 | H | 5.28614900 | -1.81309200 | 2.65523000  |
| C                                            | 1.32210300   | -1.95237700 | -1.84142600 | H | 0.35680900 | -0.98650300 | 2.49042000  |
| C                                            | 3.16607800   | -3.25219100 | -3.01761400 | H | 4.41695400 | 0.25801500  | 1.55778400  |
| C                                            | 1.73817900   | -3.29899600 | -2.45655000 | C | 1.87780900 | -2.50995400 | 2.84573100  |

|                                              |             |             |             |                                              |              |             |             |
|----------------------------------------------|-------------|-------------|-------------|----------------------------------------------|--------------|-------------|-------------|
| H                                            | 1.25031800  | -3.06753500 | 3.55087100  | H                                            | 2.32741300   | -1.23760100 | -0.80100600 |
| H                                            | 1.73502600  | -2.99464300 | 1.87060700  | Cl                                           | -2.08629800  | 0.00000100  | 0.00005100  |
| P                                            | 1.73699300  | 0.04612600  | 0.16372600  | <b>TS2B<sup>s</sup></b>                      |              |             |             |
| Cu                                           | -0.52655900 | 0.56608700  | 0.25253000  | Sum of electronic and thermal Free Energies= | -3770.489309 |             |             |
| B                                            | -2.21221400 | 0.78811100  | 1.37524900  | C                                            | -3.46819600  | -1.93750200 | -1.32219500 |
| O                                            | -3.38014400 | 1.53964700  | 1.33854800  | C                                            | -3.68291800  | -2.69706500 | -2.64362700 |
| O                                            | -2.37643500 | -0.42469700 | 2.05023500  | C                                            | -0.95788300  | -1.94311100 | -1.73694600 |
| C                                            | -4.29339300 | 0.92883600  | 2.26009500  | C                                            | -2.46368200  | -3.55675900 | -3.00450000 |
| C                                            | -3.74870900 | -0.50090600 | 2.46420100  | C                                            | -1.18329300  | -2.71120900 | -3.04906900 |
| H                                            | -3.79561700 | -0.82410100 | 3.50963200  | H                                            | -3.38961300  | -2.66894400 | -0.50901900 |
| H                                            | -4.27420900 | -1.23230600 | 1.84059000  | H                                            | -3.87028100  | -1.97432500 | -3.45068100 |
| H                                            | -4.29739100 | 1.50231100  | 3.19608300  | H                                            | -2.34734600  | -4.35150700 | -2.25389500 |
| H                                            | -5.29934400 | 0.93984600  | 1.83097600  | H                                            | -0.74209500  | -2.65131300 | -0.92814900 |
| Cl                                           | -0.66507900 | 1.87940400  | 2.30065100  | H                                            | -0.31301300  | -3.34390000 | -3.25792300 |
| Si                                           | -2.28280700 | 0.69422400  | -1.25148700 | H                                            | -4.34610100  | -1.32189500 | -1.10156300 |
| C                                            | -2.81710100 | 2.48420200  | -1.58604100 | H                                            | -4.58290600  | -3.31922200 | -2.56844100 |
| H                                            | -3.30940100 | 2.92596100  | -0.71784000 | H                                            | -0.06609700  | -1.31343800 | -1.81651000 |
| H                                            | -1.94361700 | 3.09914400  | -1.83201200 | H                                            | -2.62390400  | -4.05786300 | -3.96639200 |
| H                                            | -3.49887100 | 2.53031300  | -2.44409600 | H                                            | -1.25411100  | -1.99343000 | -3.87913500 |
| C                                            | -1.45614500 | 0.12248800  | -2.88546800 | C                                            | -2.18753700  | -1.07706500 | -1.37516700 |
| H                                            | -2.15656800 | 0.30694600  | -3.70987400 | H                                            | -2.31008200  | -0.35180700 | -2.19013600 |
| H                                            | -0.53348900 | 0.66941400  | -3.10594100 | C                                            | -2.20882300  | -2.04818700 | 4.35313200  |
| H                                            | -1.22565000 | -0.94590900 | -2.88224600 | C                                            | -2.28870900  | -2.93837500 | 3.10743600  |
| C                                            | -3.79391700 | -0.44780900 | -1.10607400 | C                                            | -2.48172200  | 0.00619100  | 2.87705800  |
| C                                            | -5.11307700 | 0.03900400  | -1.10425500 | C                                            | -1.79390000  | -2.20431200 | 1.85078100  |
| C                                            | -3.61889500 | -1.84162500 | -1.02746300 | C                                            | -2.55451000  | -0.87829100 | 1.61181500  |
| C                                            | -6.20870300 | -0.82513400 | -1.02698900 | H                                            | -1.15579700  | -1.82285500 | 4.57208200  |
| H                                            | -5.28941500 | 1.10985400  | -1.15899300 | H                                            | -3.32988700  | -3.25804300 | 2.95621600  |
| C                                            | -4.70671100 | -2.71251800 | -0.94647800 | H                                            | -0.72212200  | -1.98719000 | 1.94412000  |
| H                                            | -2.61260000 | -2.25641800 | -1.02070500 | H                                            | -1.44024100  | 0.32500800  | 3.02899500  |
| C                                            | -6.00826500 | -2.20440600 | -0.94592000 | H                                            | -2.60547100  | -2.57630100 | 5.22817700  |
| H                                            | -7.21838100 | -0.42201000 | -1.03050500 | H                                            | -1.70063400  | -3.85261200 | 3.24993100  |
| H                                            | -4.54128200 | -3.78511200 | -0.88371300 | H                                            | -3.07577600  | 0.91701200  | 2.74974200  |
| H                                            | -6.85845600 | -2.87848800 | -0.88438400 | H                                            | -1.89018000  | -2.86585100 | 0.98551300  |
| <b>B(Pin)-Cl</b>                             |             |             |             | H                                            | -3.60948400  | -1.10885700 | 1.40961800  |
| Sum of electronic and thermal Free Energies= | -714.208325 |             |             | C                                            | -2.97188200  | -0.73641100 | 4.13185900  |
| B                                            | -0.32448400 | -0.00013500 | -0.00011600 | H                                            | -2.87256300  | -0.08069900 | 5.00492000  |
| O                                            | 0.40500900  | -1.15090500 | -0.03154600 | H                                            | -4.04425800  | -0.95358100 | 4.02520000  |
| O                                            | 0.40488500  | 1.15082700  | 0.03133500  | C                                            | -4.01419800  | 2.64053700  | -2.58586400 |
| C                                            | 1.79390200  | -0.77572800 | 0.03438700  | C                                            | -4.70860700  | 1.51374300  | -1.80763400 |
| C                                            | 1.79375400  | 0.77586300  | -0.03426200 | C                                            | -2.13056800  | 2.66712200  | -0.89364100 |
| H                                            | 2.32687200  | 1.23781000  | 0.80134200  | C                                            | -4.35357200  | 1.54425800  | -0.31052400 |
| H                                            | 2.21509100  | 1.15513800  | -0.97067500 | C                                            | -2.83569200  | 1.60680100  | -0.00825400 |
| H                                            | 2.21502300  | -1.15488000 | 0.97098200  | H                                            | -4.39600500  | 3.61143900  | -2.23907300 |



|    |             |             |             |                                                           |             |             |             |
|----|-------------|-------------|-------------|-----------------------------------------------------------|-------------|-------------|-------------|
| H  | -4.42563500 | 0.55043300  | -2.24690700 | H                                                         | 2.23916500  | -0.50714800 | -2.58996500 |
| H  | -4.80355900 | 2.44997500  | 0.12114500  | C                                                         | 5.23880700  | -2.04262300 | -2.18457500 |
| H  | -2.42859200 | 3.65675100  | -0.52061200 | H                                                         | 6.67570600  | -1.55681300 | -0.65229900 |
| H  | -2.72893800 | 1.96472100  | 1.02295500  | H                                                         | 3.61638700  | -2.28043900 | -3.58620400 |
| H  | -4.26229500 | 2.57118000  | -3.65147100 | H                                                         | 5.84701700  | -2.82804000 | -2.62529000 |
| H  | -5.79705500 | 1.59041900  | -1.91746100 | <b>PhMe<sub>2</sub>Si-OAc</b>                             |             |             |             |
| H  | -1.04674700 | 2.60443900  | -0.75905200 | Sum of electronic and thermal Free Energies= -829.383260  |             |             |             |
| H  | -4.82241700 | 0.70167500  | 0.21159300  | O                                                         | -3.44034300 | -0.34729400 | 0.00008600  |
| C  | -2.49348300 | 2.59742900  | -2.38302800 | C                                                         | -2.78496500 | 0.67456800  | -0.00062100 |
| H  | -2.01336500 | 3.43070400  | -2.90822100 | O                                                         | -1.43402000 | 0.68860600  | -0.00069600 |
| H  | -2.08825800 | 1.68168300  | -2.83438500 | C                                                         | -3.36728600 | 2.06770100  | -0.00163500 |
| P  | -1.84154300 | 0.01384000  | 0.12142000  | H                                                         | -3.01947400 | 2.61470500  | -0.88299100 |
| Cu | 0.35434800  | 0.31689800  | 0.44406800  | H                                                         | -4.45531200 | 2.01315300  | -0.00101800 |
| B  | 1.97307000  | -0.69051400 | 1.03283900  | H                                                         | -3.01849300 | 2.61648900  | 0.87821400  |
| O  | 1.99812100  | -2.04548000 | 0.73305400  | Si                                                        | -0.49415600 | -0.75993800 | 0.00049600  |
| O  | 2.80095600  | -0.39908200 | 2.11052900  | C                                                         | -0.84835500 | -1.74039100 | 1.56240500  |
| C  | 3.02406300  | -2.67578000 | 1.52000500  | H                                                         | -0.20230700 | -2.62331400 | 1.62416400  |
| C  | 3.42386200  | -1.61324100 | 2.56490100  | H                                                         | -0.66500100 | -1.13351900 | 2.45482200  |
| H  | 3.05249200  | -1.84781400 | 3.57010800  | H                                                         | -1.88949200 | -2.07311600 | 1.57747700  |
| H  | 4.50681300  | -1.46521500 | 2.62288200  | C                                                         | -0.84812400 | -1.74294100 | -1.55984500 |
| H  | 2.62593900  | -3.59072900 | 1.97133100  | H                                                         | -0.66535400 | -1.13730200 | -2.45321700 |
| H  | 3.85789500  | -2.94051500 | 0.86124300  | H                                                         | -0.20156800 | -2.62557200 | -1.62042200 |
| O  | 1.27582200  | 4.43921600  | 0.26630200  | H                                                         | -1.88906200 | -2.07632200 | -1.57419500 |
| C  | 0.96353100  | 3.52602100  | 1.01108200  | C                                                         | 1.26269900  | -0.08943300 | 0.00000200  |
| O  | 1.29745000  | 2.24030300  | 0.84600700  | C                                                         | 1.54076300  | 1.28890800  | 0.00117600  |
| C  | 0.14818900  | 3.74717600  | 2.27537400  | C                                                         | 2.35485800  | -0.97758200 | -0.00135700 |
| H  | 0.78852300  | 3.57963600  | 3.14767900  | C                                                         | 2.85469700  | 1.76065800  | 0.00103800  |
| H  | -0.23738900 | 4.76706000  | 2.29786200  | H                                                         | 0.71830600  | 1.99772100  | 0.00214800  |
| H  | -0.67418300 | 3.02874000  | 2.34025300  | C                                                         | 3.66943100  | -0.51173200 | -0.00149100 |
| Si | 2.61114800  | 1.50955100  | -0.35493000 | H                                                         | 2.18415900  | -2.05269100 | -0.00237700 |
| C  | 1.81741900  | 2.17222500  | -1.94747900 | C                                                         | 3.92151900  | 0.86151200  | -0.00028400 |
| H  | 2.55051400  | 2.15710200  | -2.76097500 | H                                                         | 3.04532800  | 2.83038800  | 0.00194400  |
| H  | 0.95461900  | 1.58489800  | -2.28484300 | H                                                         | 4.49560600  | -1.21730900 | -0.00255500 |
| H  | 1.48631500  | 3.19918000  | -1.77805200 | H                                                         | 4.94433700  | 1.22771200  | -0.00039500 |
| C  | 3.97712200  | 2.59890600  | 0.37601600  | <b>1B<sup>S</sup></b>                                     |             |             |             |
| H  | 4.24420200  | 2.25358800  | 1.38092800  | Sum of electronic and thermal Free Energies= -2941.185248 |             |             |             |
| H  | 4.88090200  | 2.57243600  | -0.24029800 | C                                                         | -1.59620500 | 0.38416100  | 2.48094400  |
| H  | 3.63099900  | 3.63180100  | 0.45104400  | C                                                         | -2.49376700 | -0.18273400 | 3.59462000  |
| C  | 3.65427500  | 0.01839700  | -1.04228100 | C                                                         | -1.45792000 | -1.90149400 | 1.43593800  |
| C  | 4.91640100  | -0.31639300 | -0.51753100 | C                                                         | -2.21845600 | -1.66971600 | 3.84950600  |
| C  | 3.21220700  | -0.72263000 | -2.15432900 | C                                                         | -2.34480100 | -2.47715500 | 2.55180900  |
| C  | 5.70054500  | -1.33009700 | -1.07712900 | H                                                         | -0.54842800 | 0.33904500  | 2.80847900  |
| H  | 5.30199500  | 0.22459700  | 0.34239300  | H                                                         | -3.54741200 | -0.05045700 | 3.30982700  |
| C  | 3.98671700  | -1.73352100 | -2.72245000 | H                                                         | -1.20202900 | -1.78599100 | 4.25084100  |

|   |             |             |             |                                              |              |             |             |
|---|-------------|-------------|-------------|----------------------------------------------|--------------|-------------|-------------|
| H | -0.40018600 | -2.00242700 | 1.71477300  | Cu                                           | 1.52454000   | -0.30214600 | -0.06342900 |
| H | -2.08004100 | -3.52686500 | 2.72524800  | B                                            | 3.45899900   | -0.75851800 | 0.02152800  |
| H | -1.83727400 | 1.44093800  | 2.33394300  | O                                            | 3.99966600   | -2.00149500 | -0.29973600 |
| H | -2.34516400 | 0.39765600  | 4.51307900  | O                                            | 4.46694100   | 0.12517000  | 0.40154000  |
| H | -1.59129000 | -2.49162800 | 0.52673000  | C                                            | 5.42703200   | -1.96084300 | -0.16123700 |
| H | -2.90272200 | -2.05969200 | 4.61227500  | C                                            | 5.73713000   | -0.54098400 | 0.36231200  |
| H | -3.39335300 | -2.47108700 | 2.22043200  | H                                            | 5.74898000   | -2.74653700 | 0.53269100  |
| C | -1.75265900 | -0.41018800 | 1.16430500  | H                                            | 5.89171900   | -2.15994200 | -1.13508100 |
| H | -2.79435600 | -0.30319800 | 0.82962600  | H                                            | 6.17318900   | -0.55055900 | 1.36913100  |
| C | 0.09200900  | 4.94017800  | -0.44297900 | H                                            | 6.41893200   | 0.01198100  | -0.29489300 |
| C | 0.15723000  | 4.22431100  | 0.91185600  | <b>2B<sup>s</sup></b>                        |              |             |             |
| C | -0.92869300 | 2.84749900  | -1.48172500 | Sum of electronic and thermal Free Energies= | -3253.075514 |             |             |
| C | 0.27009600  | 2.70301700  | 0.73792300  | B                                            | -1.43965700  | -1.61964300 | -0.47572500 |
| C | -0.87991700 | 2.12135200  | -0.12152900 | O                                            | -1.55897000  | -2.22679100 | -1.72544400 |
| H | 1.04833100  | 4.80794900  | -0.96795800 | O                                            | -1.71483400  | -2.54281500 | 0.53264400  |
| H | -0.74770500 | 4.45928600  | 1.49099300  | C                                            | -1.85334600  | -3.62343600 | -1.56006100 |
| H | 1.22296800  | 2.45172100  | 0.25295300  | C                                            | -2.12597000  | -3.78929400 | -0.05103100 |
| H | -0.01843800 | 2.62159700  | -2.05542700 | H                                            | -3.18939200  | -3.95367000 | 0.16375400  |
| H | -0.04152900 | 6.01930900  | -0.30214200 | H                                            | -1.55696000  | -4.61050200 | 0.39796900  |
| H | 1.00698000  | 4.59071300  | 1.49960900  | H                                            | -2.71564100  | -3.89027000 | -2.18039000 |
| H | -1.77734500 | 2.49706200  | -2.07833800 | H                                            | -0.99438800  | -4.21723500 | -1.89778300 |
| H | 0.30132900  | 2.21869800  | 1.71845300  | C                                            | 3.83911600   | -0.62516000 | -0.79782100 |
| H | -1.83560100 | 2.31404500  | 0.38521200  | C                                            | 4.55464300   | -1.79724800 | -1.49315200 |
| C | -1.04243500 | 4.37251100  | -1.30525100 | C                                            | 1.74282300   | -1.09758400 | -2.12924500 |
| H | -1.05314400 | 4.85306000  | -2.29095300 | C                                            | 3.97876300   | -2.05813100 | -2.89177100 |
| H | -2.00804600 | 4.60669800  | -0.83451500 | C                                            | 2.45831300   | -2.26144500 | -2.83614200 |
| C | -2.82424800 | -2.78693400 | -2.56779500 | H                                            | 4.02551600   | 0.28776500  | -1.37768600 |
| C | -3.51298100 | -1.66401800 | -1.77797800 | H                                            | 4.44487300   | -2.70280400 | -0.87940300 |
| C | -0.64524000 | -1.48123600 | -2.53482200 | H                                            | 4.20520800   | -1.19872300 | -3.53914100 |
| C | -2.87977300 | -0.29387800 | -2.07367300 | H                                            | 1.86945200   | -0.18632800 | -2.72899600 |
| C | -1.34344200 | -0.24997600 | -1.89491400 | H                                            | 2.05159800   | -2.38351900 | -3.84701400 |
| H | -2.97795100 | -2.61603300 | -3.64310100 | H                                            | 4.27833300   | -0.45959400 | 0.19060100  |
| H | -3.45494600 | -1.88738100 | -0.70591100 | H                                            | 5.63026800   | -1.59081300 | -1.55365200 |
| H | -3.09600900 | -0.04486200 | -3.12285600 | H                                            | 0.67071200   | -1.30098800 | -2.07946300 |
| H | -0.63802900 | -1.31500200 | -3.62137900 | H                                            | 4.46608400   | -2.92819400 | -3.34819300 |
| H | -0.97984200 | 0.60103700  | -2.47846500 | H                                            | 2.23637600   | -3.19482000 | -2.29876600 |
| H | -3.28925600 | -3.75254300 | -2.33669500 | C                                            | 2.31721500   | -0.87378900 | -0.70994100 |
| H | -4.58076200 | -1.62637100 | -2.02537300 | H                                            | 2.15568000   | -1.80789600 | -0.15584800 |
| H | 0.40361900  | -1.50632800 | -2.21750500 | C                                            | 2.35700600   | 4.92481100  | -0.60274300 |
| H | -3.36416800 | 0.48736400  | -1.47502500 | C                                            | 2.78323300   | 3.85565500  | -1.61609800 |
| C | -1.31787600 | -2.83486600 | -2.27414100 | C                                            | 1.81277900   | 3.09018800  | 1.07857900  |
| H | -0.83471800 | -3.59786000 | -2.89566800 | C                                            | 2.04887200   | 2.52581500  | -1.37980000 |
| H | -1.15362100 | -3.14810900 | -1.23663800 | C                                            | 2.23371100   | 2.00514900  | 0.06396000  |
| P | -0.64217900 | 0.24374000  | -0.21186800 | H                                            | 1.29843200   | 5.17399400  | -0.76208000 |

|    |             |             |             |                                              |              |             |             |
|----|-------------|-------------|-------------|----------------------------------------------|--------------|-------------|-------------|
| H  | 3.86722700  | 3.69044700  | -1.53449800 | H                                            | -5.62180600  | 1.79149300  | 1.66305500  |
| H  | 0.97649100  | 2.66178500  | -1.57088100 | C                                            | -3.93608900  | 1.03172200  | -0.45685700 |
| H  | 0.73089100  | 3.25419100  | 1.00792200  | C                                            | -2.64746700  | 1.25751400  | -0.22950400 |
| H  | 2.92378900  | 5.85010500  | -0.76069700 | C                                            | -1.65926900  | 2.18572800  | 0.07347700  |
| H  | 2.59776000  | 4.20079500  | -2.64034500 | H                                            | -1.29819400  | 2.87192600  | -0.69346800 |
| H  | 2.01771100  | 2.76207700  | 2.10254800  | H                                            | -1.54324300  | 2.54667000  | 1.09648500  |
| H  | 2.40005000  | 1.78465700  | -2.10398700 | <b>3B<sup>s</sup></b>                        |              |             |             |
| H  | 3.30192700  | 1.80155200  | 0.22044300  | Sum of electronic and thermal Free Energies= | -3253.066652 |             |             |
| C  | 2.54865400  | 4.41906200  | 0.83256300  | C                                            | 3.73104500   | 0.65197600  | -0.75345800 |
| H  | 2.20011400  | 5.16848400  | 1.55338000  | C                                            | 4.92950600   | 0.57743100  | 0.21587900  |
| H  | 3.62198800  | 4.27805500  | 1.02502000  | C                                            | 4.52055000   | -1.46776400 | -1.88974600 |
| C  | 2.43279800  | -2.61156700 | 3.27370100  | C                                            | 6.12347900   | -0.14767200 | -0.42210000 |
| C  | 3.43760000  | -1.61347900 | 2.68082900  | C                                            | 5.72260300   | -1.54126400 | -0.92682700 |
| C  | 0.52439400  | -1.06172600 | 2.67305400  | H                                            | 4.01537700   | 1.29670000  | -1.60104200 |
| C  | 2.91043800  | -0.16727600 | 2.72235100  | H                                            | 4.62124000   | 0.03707000  | 1.12182200  |
| C  | 1.49109600  | 0.02287900  | 2.13235800  | H                                            | 6.49769600   | 0.44953400  | -1.26644400 |
| H  | 2.31313200  | -2.41236400 | 4.34856400  | H                                            | 4.84166300   | -0.93872700 | -2.80202000 |
| H  | 3.66140600  | -1.90898200 | 1.64977600  | H                                            | 6.57274200   | -2.02638500 | -1.42278000 |
| H  | 2.86157100  | 0.13921900  | 3.77752600  | H                                            | 2.87613900   | 1.12491800  | -0.26604400 |
| H  | 0.34641600  | -0.83023000 | 3.73366800  | H                                            | 5.22074000   | 1.58706900  | 0.53216600  |
| H  | 1.10937500  | 0.97427400  | 2.52180800  | H                                            | 4.20715000   | -2.47023800 | -2.19472400 |
| H  | 2.82309000  | -3.63294800 | 3.18840200  | H                                            | 6.94994800   | -0.22440300 | 0.29518700  |
| H  | 4.38907800  | -1.66119600 | 3.22470500  | H                                            | 5.45447700   | -2.17339100 | -0.06928300 |
| H  | -0.44434200 | -1.00539200 | 2.17118000  | C                                            | 3.34739800   | -0.71732300 | -1.27099200 |
| H  | 3.62631000  | 0.51352100  | 2.24751600  | C                                            | 2.13460600   | -1.26310800 | -1.19201000 |
| C  | 1.06666900  | -2.49303100 | 2.58569700  | C                                            | 1.46220200   | -2.45547300 | -1.49479400 |
| H  | 0.34387100  | -3.17719100 | 3.04407300  | H                                            | 1.12776200   | -2.67214100 | -2.51048500 |
| H  | 1.14355900  | -2.79979500 | 1.53509800  | H                                            | 1.60199000   | -3.34606700 | -0.88074300 |
| P  | 1.30533700  | 0.37765600  | 0.28425000  | C                                            | -3.04141000  | 0.01401500  | 1.39497000  |
| Cu | -0.96050600 | 0.30211100  | -0.14816600 | C                                            | -4.56423800  | 0.23476900  | 1.44562500  |
| C  | -4.57018500 | -0.30198900 | -0.77462000 | C                                            | -3.02962500  | 0.72743700  | -1.02167600 |
| C  | -5.68432800 | -0.64128500 | 0.23651300  | C                                            | -5.21901300  | 0.05134300  | 0.07100500  |
| C  | -4.94135900 | 2.17121600  | -0.35492900 | C                                            | -4.55021600  | 0.95239400  | -0.97414700 |
| C  | -6.72181400 | 0.48764000  | 0.33244200  | H                                            | -2.82973600  | -1.02988700 | 1.13581800  |
| C  | -6.05715300 | 1.83407800  | 0.65551200  | H                                            | -4.77038400  | 1.25153800  | 1.81046300  |
| H  | -5.01753900 | -0.24838300 | -1.77985700 | H                                            | -5.11921400  | -0.99786700 | -0.24098100 |
| H  | -5.22889400 | -0.80466000 | 1.22241700  | H                                            | -2.82300400  | -0.29546300 | -1.35774300 |
| H  | -7.25493500 | 0.56999100  | -0.62607100 | H                                            | -4.97859100  | 0.77133300  | -1.96720200 |
| H  | -5.40119300 | 2.33011000  | -1.34322800 | H                                            | -2.63117500  | 0.18015100  | 2.39535300  |
| H  | -6.80505900 | 2.63686700  | 0.66729900  | H                                            | -5.00743400  | -0.45252900 | 2.17652100  |
| H  | -3.81493300 | -1.08797900 | -0.80400400 | H                                            | -2.59057900  | 1.39421900  | -1.76704000 |
| H  | -6.17178100 | -1.58231900 | -0.04728300 | H                                            | -6.29411300  | 0.26047400  | 0.12856200  |
| H  | -4.43489600 | 3.10067300  | -0.07968300 | H                                            | -4.75839100  | 2.00487600  | -0.73132300 |
| H  | -7.47858500 | 0.24704600  | 1.08933900  | C                                            | -2.37143500  | 0.94397400  | 0.35759300  |

|    |             |             |             |                                              |              |             |             |
|----|-------------|-------------|-------------|----------------------------------------------|--------------|-------------|-------------|
| H  | -2.55001800 | 1.98088200  | 0.67762600  | H                                            | -3.49049300  | -4.23737300 | 0.75249600  |
| C  | 1.67162400  | 0.08038800  | 4.48991800  | H                                            | -2.22759500  | -5.22756900 | -0.00742700 |
| C  | 0.42918700  | -0.74138600 | 4.12458900  | <b>TS3B<sup>s</sup></b>                      |              |             |             |
| C  | 1.25197200  | 1.57598900  | 2.46720400  | Sum of electronic and thermal Free Energies= | -3253.051900 |             |             |
| C  | 0.13997700  | -0.68580800 | 2.61672800  | B                                            | 1.83492800   | -1.40903900 | -0.31624800 |
| C  | -0.01367400 | 0.76969500  | 2.11093900  | O                                            | 2.22914700   | -2.13645200 | 0.79893300  |
| H  | 2.55877400  | -0.38680200 | 4.03956300  | O                                            | 1.91784300   | -2.18257400 | -1.47345800 |
| H  | -0.43970400 | -0.35356900 | 4.67610200  | C                                            | 2.76626800   | -3.39546200 | 0.35500200  |
| H  | 0.97371200  | -1.15122300 | 2.07257600  | C                                            | 2.29353800   | -3.51776100 | -1.10565900 |
| H  | 2.11493800  | 1.17280700  | 1.92084900  | H                                            | 3.07740500   | -3.87630000 | -1.78036300 |
| H  | 1.83215300  | 0.07544900  | 5.57469700  | H                                            | 1.42322100   | -4.17965700 | -1.20436800 |
| H  | 0.55344900  | -1.78515200 | 4.43623800  | H                                            | 3.86015500   | -3.36645400 | 0.43459400  |
| H  | 1.14587900  | 2.62412700  | 2.16996300  | H                                            | 2.39240000   | -4.19800500 | 0.99823800  |
| H  | -0.74536500 | -1.28237100 | 2.38229300  | C                                            | -3.48353700  | -0.13340600 | 1.80939000  |
| H  | -0.85269100 | 1.23861600  | 2.64301300  | C                                            | -3.99130000  | -1.04241900 | 2.94292800  |
| C  | 1.54464300  | 1.52069200  | 3.97802100  | C                                            | -1.09655200  | -0.81126800 | 2.33257100  |
| H  | 2.45942200  | 2.08644000  | 4.19233800  | C                                            | -2.93854100  | -1.20662600 | 4.04745900  |
| H  | 0.73200200  | 2.02700100  | 4.51851500  | C                                            | -1.60634400  | -1.70812800 | 3.47273900  |
| C  | -0.98006900 | 4.19596500  | -2.47385100 | H                                            | -3.32668700  | 0.87451500  | 2.21424300  |
| C  | -1.51177100 | 4.16584700  | -1.03370100 | H                                            | -4.24304900  | -2.02960500 | 2.52961300  |
| C  | 0.61458100  | 2.29629200  | -1.92711100 | H                                            | -2.77900700  | -0.23650200 | 4.53963500  |
| C  | -0.44030200 | 3.68131300  | -0.04260100 | H                                            | -0.84540700  | 0.17777500  | 2.73963200  |
| C  | 0.23566100  | 2.33962200  | -0.42281400 | H                                            | -0.84724900  | -1.76855000 | 4.26145300  |
| H  | -0.16750700 | 4.93385400  | -2.54260900 | H                                            | -4.25326400  | -0.04037300 | 1.03583400  |
| H  | -2.39450100 | 3.51775100  | -0.98790900 | H                                            | -4.92070500  | -0.63271600 | 3.35699000  |
| H  | 0.35166500  | 4.44386700  | -0.00921500 | H                                            | -0.17125600  | -1.22064400 | 1.91556600  |
| H  | 1.50597300  | 2.92927600  | -2.04246600 | H                                            | -3.30372800  | -1.89180500 | 4.82181300  |
| H  | 1.19421800  | 2.31412800  | 0.10129500  | H                                            | -1.73915200  | -2.73068500 | 3.09104000  |
| H  | -1.76558000 | 4.53327300  | -3.16043500 | C                                            | -2.15863800  | -0.66130900 | 1.21905200  |
| H  | -1.84956500 | 5.16529500  | -0.73367200 | H                                            | -2.34253400  | -1.66852700 | 0.82375800  |
| H  | 0.92891700  | 1.28296400  | -2.19923500 | C                                            | -1.54204900  | 4.98910800  | -0.09866900 |
| H  | -0.85425800 | 3.63777900  | 0.97202300  | C                                            | -1.69663000  | 4.20680000  | 1.21122400  |
| C  | -0.44939100 | 2.82005100  | -2.90077100 | C                                            | -1.93865100  | 2.83866100  | -1.40940900 |
| H  | -0.01280100 | 2.87858400  | -3.90504600 | C                                            | -1.29853000  | 2.73346400  | 1.03503600  |
| H  | -1.28184800 | 2.11118000  | -2.97774400 | C                                            | -2.09054700  | 2.03935800  | -0.09749900 |
| P  | -0.49605200 | 0.73997300  | 0.27658000  | H                                            | -0.47854100  | 5.03117800  | -0.37163600 |
| Cu | 0.22457500  | -1.19061300 | -0.65705300 | H                                            | -2.74150600  | 4.26349700  | 1.54899100  |
| B  | -1.32328200 | -2.47657100 | -0.65360400 | H                                            | -0.22922700  | 2.67213800  | 0.78768500  |
| O  | -2.13638000 | -2.76189300 | -1.74733700 | H                                            | -0.89551200  | 2.76712200  | -1.74647900 |
| O  | -1.67353300 | -3.27739200 | 0.43370800  | H                                            | -1.87419900  | 6.02582800  | 0.03268200  |
| C  | -3.11902600 | -3.74095800 | -1.37108700 | H                                            | -1.08819100  | 4.65888300  | 2.00360000  |
| C  | -2.67378700 | -4.22564000 | 0.02301700  | H                                            | -2.56183300  | 2.40654800  | -2.19897000 |
| H  | -4.10956500 | -3.26805200 | -1.34994100 | H                                            | -1.43171800  | 2.20160700  | 1.98304700  |
| H  | -3.14055800 | -4.54343000 | -2.11584600 | H                                            | -3.15423100  | 2.01661700  | 0.17443600  |

|                                              |              |             |             |   |             |             |             |
|----------------------------------------------|--------------|-------------|-------------|---|-------------|-------------|-------------|
| C                                            | -2.32977800  | 4.31586600  | -1.22940600 | C | -4.05149300 | -0.94969800 | -1.15529100 |
| H                                            | -2.17458000  | 4.85004900  | -2.17447900 | C | -5.25338600 | -1.23134400 | -0.23057200 |
| H                                            | -3.40516900  | 4.38124000  | -1.00885700 | C | -4.76848600 | 1.47034600  | -1.36264600 |
| C                                            | -3.80341100  | -2.95885700 | -2.03716900 | C | -6.41974500 | -0.27648500 | -0.52637800 |
| C                                            | -4.44594000  | -1.72149600 | -1.39430700 | C | -5.97553600 | 1.19141000  | -0.44221000 |
| C                                            | -1.65553800  | -1.66309400 | -2.40164500 | H | -4.34932500 | -1.20438600 | -2.18676100 |
| C                                            | -3.82886600  | -0.41384400 | -1.92085600 | H | -4.93619500 | -1.10070300 | 0.81367600  |
| C                                            | -2.28270800  | -0.35563600 | -1.85108000 | H | -6.80309600 | -0.47934900 | -1.53741300 |
| H                                            | -4.03193700  | -2.96933500 | -3.11262000 | H | -5.10322200 | 1.36007700  | -2.40778900 |
| H                                            | -4.33140200  | -1.78602800 | -0.30638600 | H | -6.81047100 | 1.85682600  | -0.69773800 |
| H                                            | -4.10538500  | -0.31652600 | -2.98079800 | H | -3.20330800 | -1.59252100 | -0.89846900 |
| H                                            | -1.81151500  | -1.65630900 | -3.49016500 | H | -5.58005200 | -2.27432800 | -0.33468200 |
| H                                            | -1.95836300  | 0.43636600  | -2.53546800 | H | -4.43348100 | 2.50648200  | -1.24715300 |
| H                                            | -4.24048100  | -3.87253700 | -1.61691100 | H | -7.25201300 | -0.46264000 | 0.16436400  |
| H                                            | -5.52563800  | -1.71062300 | -1.58690300 | H | -5.69304500 | 1.42279900  | 0.59416400  |
| H                                            | -0.57233400  | -1.66872100 | -2.24612100 | C | -3.62317500 | 0.50466400  | -1.09424400 |
| H                                            | -4.27721400  | 0.44988000  | -1.41600400 | C | -2.37235200 | 0.87194000  | -0.80400200 |
| C                                            | -2.28051000  | -2.95174300 | -1.84824800 | C | -1.78752700 | 2.23225600  | -0.68734000 |
| H                                            | -1.83104700  | -3.81463700 | -2.35398000 | H | -1.70375800 | 2.80672800  | -1.61413300 |
| H                                            | -2.03897200  | -3.06530000 | -0.78300900 | H | -2.15171700 | 2.85298300  | 0.13630700  |
| P                                            | -1.47494600  | 0.27124200  | -0.27309400 | C | 3.01652800  | 0.48043000  | 1.51483700  |
| Cu                                           | 0.70402400   | 0.23402000  | -0.50990300 | C | 4.50512200  | 0.85811300  | 1.61110100  |
| C                                            | 4.00023800   | 0.29892100  | 1.35667500  | C | 3.21542500  | 0.36239400  | -0.99447500 |
| C                                            | 5.38750200   | -0.36688500 | 1.46192800  | C | 5.00017500  | 1.57341100  | 0.34842100  |
| C                                            | 4.79544300   | 1.65099900  | -0.63390200 | C | 4.70414900  | 0.73653300  | -0.90169500 |
| C                                            | 6.49349000   | 0.53806100  | 0.90207400  | H | 2.40884200  | 1.39411800  | 1.47058900  |
| C                                            | 6.17677100   | 0.97244800  | -0.53563600 | H | 5.09887100  | -0.05408900 | 1.76655500  |
| H                                            | 3.99776400   | 1.17967400  | 2.02192800  | H | 4.49418600  | 2.54552200  | 0.26040700  |
| H                                            | 5.37232600   | -1.31066800 | 0.89923300  | H | 2.61541800  | 1.27188500  | -1.12686700 |
| H                                            | 6.58366900   | 1.43149000  | 1.53775200  | H | 5.00190900  | 1.27992300  | -1.80640800 |
| H                                            | 4.84098400   | 2.60572900  | -0.08198300 | H | 2.72769200  | -0.04434700 | 2.43000400  |
| H                                            | 6.95360000   | 1.65126600  | -0.91026700 | H | 4.66515100  | 1.48603200  | 2.49602500  |
| H                                            | 3.22651900   | -0.37599200 | 1.72110000  | H | 3.05461300  | -0.24623200 | -1.88683600 |
| H                                            | 5.59844000   | -0.62717100 | 2.50696000  | H | 6.07334800  | 1.78550100  | 0.42482400  |
| H                                            | 4.56074400   | 1.89790400  | -1.67285000 | H | 5.31061200  | -0.18054600 | -0.87591100 |
| H                                            | 7.46456100   | 0.02842800  | 0.94280500  | C | 2.72360500  | -0.38144100 | 0.26541100  |
| H                                            | 6.18506000   | 0.09007400  | -1.19012800 | H | 3.27909300  | -1.32569100 | 0.36545300  |
| C                                            | 3.69540100   | 0.78241400  | -0.04300400 | C | -1.33988300 | -1.94856800 | 4.20557200  |
| C                                            | 2.56878900   | 0.57209200  | -0.76254800 | C | -0.45665500 | -0.69641100 | 4.13957300  |
| C                                            | 1.88965700   | 1.35169900  | -1.74668100 | C | -0.43100800 | -2.68459900 | 1.93933800  |
| H                                            | 2.05606900   | 2.42715300  | -1.73483600 | C | -0.16848800 | -0.28981300 | 2.68668400  |
| H                                            | 1.70093100   | 0.93916800  | -2.74017700 | C | 0.47958500  | -1.44091500 | 1.87765600  |
| <b>TS4B<sup>s</sup></b>                      |              |             |             | H | -2.33311500 | -1.71144200 | 3.79964500  |
| Sum of electronic and thermal Free Energies= | -3253.052770 |             |             | H | 0.49262800  | -0.89125700 | 4.65961700  |

|                                                          |             |             |             |   |             |             |             |
|----------------------------------------------------------|-------------|-------------|-------------|---|-------------|-------------|-------------|
| H                                                        | -1.11235000 | -0.01853300 | 2.19344400  | C | -2.63504800 | 3.62212700  | -1.34556700 |
| H                                                        | -1.37974400 | -2.46961000 | 1.42915200  | H | -2.57062200 | 3.96239300  | -2.38654900 |
| H                                                        | -1.49191600 | -2.25844000 | 5.24637700  | H | -2.05634700 | 4.31239700  | -0.72252200 |
| H                                                        | -0.93367800 | 0.13854300  | 4.66618000  | H | -4.81856900 | 3.92839600  | -1.55315400 |
| H                                                        | 0.02796600  | -3.53325700 | 1.42225700  | H | -4.25679900 | 3.88948100  | 0.13102400  |
| H                                                        | 0.45757400  | 0.60630000  | 2.66533400  | C | 2.68996100  | -0.34675400 | 2.47219000  |
| H                                                        | 1.43411400  | -1.71031400 | 2.35054500  | C | 2.38435300  | -0.17962300 | 3.97158200  |
| C                                                        | -0.72275900 | -3.09468000 | 3.39427700  | C | 0.21182600  | -0.66491000 | 2.00902100  |
| H                                                        | -1.38520100 | -3.96861300 | 3.39929400  | C | 1.10639600  | -0.92871700 | 4.37587100  |
| H                                                        | 0.21545100  | -3.41266300 | 3.87157700  | C | -0.08664400 | -0.50369700 | 3.50787000  |
| C                                                        | 2.32931500  | -3.07050900 | -3.36726300 | H | 2.91180200  | -1.40313800 | 2.27525700  |
| C                                                        | 2.86871200  | -3.26659400 | -1.94232400 | H | 2.26598100  | 0.88959800  | 4.19873600  |
| C                                                        | 0.21783900  | -2.02240200 | -2.42778600 | H | 1.27082900  | -2.00960500 | 4.26057300  |
| C                                                        | 1.73174500  | -3.43718100 | -0.92133100 | H | 0.33069900  | -1.73158700 | 1.77682900  |
| C                                                        | 0.65565700  | -2.32589600 | -0.97170100 | H | -0.97858000 | -1.08382500 | 3.77169400  |
| H                                                        | 1.80539700  | -3.98487300 | -3.68135400 | H | 3.59433800  | 0.21392900  | 2.21183600  |
| H                                                        | 3.49717000  | -2.41057100 | -1.67047900 | H | 3.23779200  | -0.53064600 | 4.56431700  |
| H                                                        | 1.22511100  | -4.38900000 | -1.13763500 | H | -0.63620200 | -0.31722100 | 1.40940600  |
| H                                                        | -0.40943800 | -2.86773800 | -2.74524400 | H | 0.88690800  | -0.75896700 | 5.43660500  |
| H                                                        | -0.24529800 | -2.72207600 | -0.49582500 | H | -0.32858700 | 0.54873900  | 3.71429000  |
| H                                                        | 3.16001700  | -2.93196400 | -4.06941100 | C | 1.49458600  | 0.10136400  | 1.60741300  |
| H                                                        | 3.52043000  | -4.14794900 | -1.90355900 | H | 1.30533200  | 1.16009500  | 1.82419300  |
| H                                                        | -0.43722800 | -1.14412200 | -2.43699600 | C | 3.81378800  | -3.72147300 | -2.13748100 |
| H                                                        | 2.14213100  | -3.54012700 | 0.09052400  | C | 3.29881300  | -3.81670900 | -0.69604600 |
| C                                                        | 1.35786000  | -1.88354100 | -3.44466900 | C | 3.53381800  | -1.19149900 | -2.05414500 |
| H                                                        | 0.93122900  | -1.81084600 | -4.45213700 | C | 2.35387400  | -2.65363400 | -0.35660500 |
| H                                                        | 1.90216100  | -0.94606400 | -3.28175700 | C | 3.00331500  | -1.27153000 | -0.60566900 |
| P                                                        | 0.89513600  | -0.81555700 | 0.13711900  | H | 2.97256700  | -3.85073400 | -2.83264200 |
| Cu                                                       | -0.51932600 | 0.76028100  | -0.34062800 | H | 4.15259500  | -3.80725600 | -0.00329000 |
| B                                                        | 0.12362000  | 2.65921200  | -0.19547600 | H | 1.44707700  | -2.72120500 | -0.97369900 |
| O                                                        | 0.84328900  | 3.29716600  | -1.20160400 | H | 2.68140800  | -1.19865500 | -2.74866900 |
| O                                                        | 0.26470700  | 3.31716000  | 1.02336000  | H | 4.52068300  | -4.53313000 | -2.34624100 |
| C                                                        | 1.37980100  | 4.51784100  | -0.67036800 | H | 2.77902500  | -4.76872400 | -0.53601300 |
| C                                                        | 1.20962300  | 4.38333500  | 0.85729800  | H | 4.06737400  | -0.24985700 | -2.21910800 |
| H                                                        | 2.42495100  | 4.62737800  | -0.97704500 | H | 2.02272600  | -2.74181500 | 0.68333800  |
| H                                                        | 0.81150000  | 5.36502800  | -1.07580700 | H | 3.85158500  | -1.14831900 | 0.08126400  |
| H                                                        | 2.15097600  | 4.11351100  | 1.35402600  | C | 4.47526200  | -2.36082000 | -2.38914600 |
| H                                                        | 0.82254600  | 5.29362000  | 1.32659000  | H | 4.80119100  | -2.27926600 | -3.43295100 |
| <b>4B<sup>s</sup></b>                                    |             |             |             | H | 5.38204900  | -2.28008700 | -1.77269800 |
| Sum of electronic and thermal Free Energies=-3253.119996 |             |             |             | C | 2.60913800  | 4.17632900  | 0.83871700  |
| B                                                        | -3.10838900 | 1.40481400  | -0.99827400 | C | 3.58670700  | 3.02570600  | 1.11848000  |
| O                                                        | -4.31773800 | 2.05460900  | -0.82566100 | C | 1.51107000  | 2.81678300  | -1.00037400 |
| O                                                        | -2.08066000 | 2.30605200  | -1.24710100 | C | 3.82922900  | 2.16260500  | -0.13233100 |
| C                                                        | -4.09819500 | 3.46766400  | -0.86939700 | C | 2.53979600  | 1.66790700  | -0.83119700 |

|                                              |              |             |             |   |             |             |             |
|----------------------------------------------|--------------|-------------|-------------|---|-------------|-------------|-------------|
| H                                            | 3.06400100   | 4.86985700  | 0.11675100  | H | -4.69087500 | -2.14875100 | -2.52840700 |
| H                                            | 3.19279200   | 2.41058900  | 1.93572100  | H | -6.57046200 | -1.62227500 | -1.00352900 |
| H                                            | 4.37654600   | 2.77787500  | -0.86143900 | H | -1.74039600 | -2.56048600 | -0.20368800 |
| H                                            | 1.89665900   | 3.48537000  | -1.78364500 | H | -3.50470600 | -3.82796400 | 1.10177800  |
| H                                            | 2.81843600   | 1.37162000  | -1.84964900 | H | -4.81898200 | -0.40701500 | -2.30354400 |
| H                                            | 2.43272700   | 4.75247000  | 1.75486900  | H | -5.88378200 | -3.00263800 | 0.98487200  |
| H                                            | 4.54660700   | 3.42157900  | 1.47169900  | H | -5.48612500 | -0.72507700 | 0.05893000  |
| H                                            | 0.55937100   | 2.41765500  | -1.36633300 | C | -3.11571500 | -1.33267700 | -1.30489700 |
| H                                            | 4.49209200   | 1.32225200  | 0.10626200  | C | -2.20588600 | -0.34165900 | -1.43761200 |
| C                                            | 1.28402200   | 3.65450500  | 0.26580700  | C | -2.54970700 | 0.97807800  | -2.14224800 |
| H                                            | 0.61845400   | 4.49303200  | 0.02782900  | H | -1.71689900 | 1.27903800  | -2.79163700 |
| H                                            | 0.75953300   | 3.06032800  | 1.02549700  | H | -3.44741700 | 0.92791100  | -2.77281400 |
| P                                            | 1.73425500   | 0.06742900  | -0.26199100 | C | 2.01759700  | 2.46362500  | 0.23203900  |
| Cu                                           | -0.17353400  | -0.28472200 | -1.29711200 | C | 2.82391900  | 3.65277000  | -0.31941200 |
| C                                            | -4.39520600  | -0.46243700 | 1.03279800  | C | 2.48499300  | 1.17658000  | -1.87566400 |
| C                                            | -5.74959900  | -1.20296000 | 1.02247000  | C | 2.79900000  | 3.69658300  | -1.85217200 |
| C                                            | -3.28241000  | -2.44784700 | -0.03049100 | C | 3.28012100  | 2.36466700  | -2.44017400 |
| C                                            | -5.55722600  | -2.72474100 | 1.07571300  | H | 0.96079200  | 2.58622200  | -0.04070400 |
| C                                            | -4.62646000  | -3.20753700 | -0.04531900 | H | 3.86521300  | 3.57578400  | 0.02587300  |
| H                                            | -3.91379000  | -0.66123600 | 2.00722800  | H | 1.77232200  | 3.89136900  | -2.19126300 |
| H                                            | -6.28985800  | -0.93454900 | 0.10477900  | H | 1.43300300  | 1.25672300  | -2.18185300 |
| H                                            | -5.12077100  | -2.99838600 | 2.04821900  | H | 3.19617000  | 2.37420300  | -3.53342500 |
| H                                            | -2.75590300  | -2.70875300 | 0.90467200  | H | 2.07172700  | 2.47697000  | 1.32490800  |
| H                                            | -4.45009000  | -4.28752600 | 0.04377500  | H | 2.42622000  | 4.58619800  | 0.09681500  |
| H                                            | -4.56365200  | 0.61418700  | 0.97401100  | H | 2.86211000  | 0.24845000  | -2.31045900 |
| H                                            | -6.36878500  | -0.86826100 | 1.86509900  | H | 3.41586300  | 4.52431900  | -2.22190200 |
| H                                            | -2.64810800  | -2.79732200 | -0.84790600 | H | 4.34715200  | 2.22884700  | -2.21091900 |
| H                                            | -6.52610300  | -3.23694900 | 1.01554200  | C | 2.53292700  | 1.11862300  | -0.33336500 |
| H                                            | -5.11351100  | -3.04503800 | -1.01630300 | H | 3.57313600  | 0.98012400  | -0.00453500 |
| C                                            | -3.48383400  | -0.94632500 | -0.07945400 | C | 0.20365900  | -0.19216000 | 4.89549800  |
| C                                            | -2.88721900  | -0.13734700 | -1.00106700 | C | -0.01505000 | 1.02895200  | 3.99185400  |
| C                                            | -1.92089400  | -0.59315400 | -2.06313100 | C | 1.63577900  | -1.25953100 | 3.07606900  |
| H                                            | -2.08450400  | -1.63297300 | -2.36461100 | C | 0.09319500  | 0.65421100  | 2.50621700  |
| H                                            | -2.02992700  | 0.01967600  | -2.96738400 | C | 1.44549500  | -0.02210100 | 2.17536800  |
| <b>5B<sup>s</sup></b>                        |              |             |             | H | -0.62301100 | -0.90159700 | 4.75039400  |
| Sum of electronic and thermal Free Energies= | -3253.114250 |             |             | H | 0.73525700  | 1.79693600  | 4.22976800  |
| C                                            | -2.77585200  | -2.61411900 | -0.56321200 | H | -0.71368800 | -0.04237400 | 2.24178000  |
| C                                            | -3.74223200  | -2.87503600 | 0.60953300  | H | 0.86823200  | -2.01031400 | 2.84086600  |
| C                                            | -4.55563400  | -1.33726300 | -1.79334300 | H | 0.18085700  | 0.10240700  | 5.95133300  |
| C                                            | -5.20233100  | -2.87086800 | 0.13419200  | H | -0.99501300 | 1.47976500  | 4.18976800  |
| C                                            | -5.53961200  | -1.58069700 | -0.62783800 | H | 2.60813400  | -1.72977600 | 2.89732300  |
| H                                            | -2.83128400  | -3.47608100 | -1.25039200 | H | -0.06157300 | 1.53619800  | 1.87772700  |
| H                                            | -3.60470600  | -2.08435300 | 1.36115800  | H | 2.25636400  | 0.67961800  | 2.41405200  |
| H                                            | -5.36515000  | -3.73254800 | -0.53065300 | C | 1.53043400  | -0.88758300 | 4.56641600  |

|                                              |              |             |             |    |             |             |             |
|----------------------------------------------|--------------|-------------|-------------|----|-------------|-------------|-------------|
| H                                            | 1.65166300   | -1.78989000 | 5.17771300  | H  | -2.54770400 | 0.46437200  | -2.32842800 |
| H                                            | 2.36463600   | -0.22065000 | 4.82714000  | H  | -6.37566300 | -1.54050200 | -2.41860700 |
| C                                            | 4.41943200   | -2.66443500 | -2.04975000 | H  | -5.01797900 | 0.51743300  | -2.67094600 |
| C                                            | 4.81525300   | -1.68721400 | -0.93279800 | C  | -3.44943600 | 0.17814900  | -0.34920700 |
| C                                            | 2.06665000   | -2.80215600 | -1.10047700 | H  | -4.01817800 | 1.11480500  | -0.36383600 |
| C                                            | 4.00370800   | -1.93593100 | 0.34925800  | C  | -1.15178400 | -0.55878000 | 5.07543400  |
| C                                            | 2.47114800   | -1.95522600 | 0.13627800  | C  | -2.14556800 | -1.37710700 | 4.24249500  |
| H                                            | 4.67014000   | -3.68827900 | -1.73668800 | C  | -1.03033500 | 1.15096700  | 3.18806800  |
| H                                            | 4.66745900   | -0.65812700 | -1.28081100 | C  | -1.94042300 | -1.15149700 | 2.73616800  |
| H                                            | 4.29348800   | -2.92048600 | 0.74420400  | C  | -2.05209100 | 0.34303600  | 2.35410100  |
| H                                            | 2.16291800   | -3.85771900 | -0.80969000 | H  | -0.13421100 | -0.93165100 | 4.89265600  |
| H                                            | 2.03640200   | -2.49024700 | 0.98636900  | H  | -3.17215800 | -1.09592000 | 4.51849500  |
| H                                            | 5.00577000   | -2.46349900 | -2.95407200 | H  | -0.94472200 | -1.51256700 | 2.44742900  |
| H                                            | 5.88373400   | -1.78371300 | -0.70568100 | H  | -0.01337500 | 0.84477500  | 2.90366400  |
| H                                            | 1.00555800   | -2.63583400 | -1.31931400 | H  | -1.34525800 | -0.68984000 | 6.14666000  |
| H                                            | 4.28185900   | -1.20889600 | 1.12188600  | H  | -2.04621000 | -2.44547500 | 4.46885800  |
| C                                            | 2.91724900   | -2.58339900 | -2.35820000 | H  | -1.10260700 | 2.22121400  | 2.98056600  |
| H                                            | 2.64370400   | -3.33426300 | -3.10878000 | H  | -2.64448700 | -1.75800200 | 2.16709600  |
| H                                            | 2.68533800   | -1.61158700 | -2.80843700 | H  | -3.06039200 | 0.69841200  | 2.61091400  |
| P                                            | 1.51998500   | -0.33404300 | 0.30670700  | C  | -1.22027400 | 0.92584300  | 4.69896600  |
| Cu                                           | -0.46963100  | -0.41111800 | -0.63349700 | H  | -0.46353800 | 1.49748800  | 5.24956500  |
| B                                            | -2.74824400  | 2.05143400  | -1.02183300 | H  | -2.19638400 | 1.33237300  | 4.99998900  |
| O                                            | -1.71173900  | 2.72184300  | -0.38609000 | C  | -3.27509200 | 4.42929900  | -1.19159900 |
| O                                            | -3.98158800  | 2.41536800  | -0.52355600 | C  | -3.74981800 | 3.87199400  | 0.15532700  |
| C                                            | -2.28120800  | 3.65151000  | 0.54605500  | C  | -1.22844100 | 2.92996100  | -1.10907700 |
| C                                            | -3.78587500  | 3.29378500  | 0.58823200  | C  | -2.57327800 | 3.39516400  | 1.02446400  |
| H                                            | -1.79196600  | 3.54335600  | 1.51981700  | C  | -1.55504000 | 2.44726000  | 0.32936400  |
| H                                            | -2.10619300  | 4.67260000  | 0.18487900  | H  | -2.66772900 | 5.32956900  | -1.01986800 |
| H                                            | -4.06108700  | 2.77117000  | 1.51259700  | H  | -4.45583700 | 3.05116500  | -0.02364000 |
| H                                            | -4.43330100  | 4.17048400  | 0.48330300  | H  | -2.01047200 | 4.28787100  | 1.33359000  |
| <b>TSSB<sup>s</sup></b>                      |              |             |             | H  | -0.55225800 | 3.78946000  | -1.00877800 |
| Sum of electronic and thermal Free Energies= | -3990.735459 |             |             | H  | -0.61014900 | 2.53914500  | 0.87677400  |
| C                                            | -4.32780300  | -0.88479900 | 0.34013500  | H  | -4.13340400 | 4.74185800  | -1.79809400 |
| C                                            | -5.65221800  | -1.07928700 | -0.42040900 | H  | -4.30993600 | 4.63518800  | 0.70938700  |
| C                                            | -3.18810500  | -0.25709800 | -1.81032700 | H  | -0.65371000 | 2.16712700  | -1.64252800 |
| C                                            | -5.41910700  | -1.46216100 | -1.88855600 | H  | -2.95823600 | 2.95238600  | 1.94894500  |
| C                                            | -4.50080100  | -0.44913900 | -2.58630400 | C  | -2.43761000 | 3.38588600  | -1.94094000 |
| H                                            | -3.77852600  | -1.83294600 | 0.36402200  | H  | -2.07790800 | 3.79626600  | -2.89199300 |
| H                                            | -6.23500600  | -0.14801200 | -0.37487200 | H  | -3.07901700 | 2.53450400  | -2.19973400 |
| H                                            | -4.95428400  | -2.45713200 | -1.93149800 | P  | -1.80903700 | 0.58519600  | 0.49501200  |
| H                                            | -2.64117400  | -1.20802900 | -1.77665700 | Cu | -0.04288500 | -0.64727000 | -0.30874400 |
| H                                            | -4.28331800  | -0.77422000 | -3.61119000 | C  | -1.32608100 | -3.92588300 | -0.41633100 |
| H                                            | -4.54558300  | -0.60371300 | 1.37601100  | O  | -1.23408900 | -2.65643500 | -0.24341200 |
| H                                            | -6.25412600  | -1.84641200 | 0.08149900  | C  | -1.97639800 | -4.73486600 | 0.69915400  |



|    |             |             |             |                                              |              |             |             |
|----|-------------|-------------|-------------|----------------------------------------------|--------------|-------------|-------------|
| H  | -3.05247300 | -4.52806700 | 0.71393800  | H                                            | 3.76285100   | 4.77300100  | 0.50180200  |
| H  | -1.82540000 | -5.80381000 | 0.54397000  | <b>TS6B<sup>s</sup></b>                      |              |             |             |
| H  | -1.57394600 | -4.43264500 | 1.66977700  | Sum of electronic and thermal Free Energies= | -3476.667602 |             |             |
| C  | 6.96436000  | -0.32464200 | 1.24649100  | C                                            | 3.19754400   | -1.30588300 | -0.98141000 |
| C  | 6.38350000  | 0.36931400  | 0.00515900  | C                                            | 3.57199700   | -2.63422200 | -1.66265500 |
| C  | 5.49777000  | -0.59044800 | -0.81628800 | C                                            | 0.81977000   | -1.53800600 | -1.84796300 |
| C  | 4.97420200  | -1.90771300 | 1.29241900  | C                                            | 2.69569300   | -2.90423700 | -2.89367200 |
| C  | 5.85716600  | -0.94447400 | 2.11229700  | C                                            | 1.20460500   | -2.85905900 | -2.53300800 |
| H  | 5.04624500  | -0.06139500 | -1.65994100 | H                                            | 3.42040900   | -0.48323100 | -1.67140400 |
| H  | 5.77682400  | 1.22945000  | 0.31585600  | H                                            | 3.45298900   | -3.45722800 | -0.94334700 |
| H  | 7.19255100  | 0.76186000  | -0.62361900 | H                                            | 2.90706900   | -2.14456000 | -3.65960000 |
| H  | 7.65906700  | -1.11630600 | 0.92874000  | H                                            | 0.93224000   | -0.71372500 | -2.56374000 |
| H  | 7.55437400  | 0.38652200  | 1.83797600  | H                                            | 0.58744700   | -3.00147600 | -3.42746700 |
| H  | 4.15630300  | -2.29925700 | 1.90606700  | H                                            | 3.82844000   | -1.15034200 | -0.10049800 |
| H  | 5.58933400  | -2.77027800 | 0.98934100  | H                                            | 4.63212900   | -2.61749700 | -1.94263700 |
| H  | 5.22551200  | -0.14280700 | 2.51823300  | H                                            | -0.23501600  | -1.56205300 | -1.56165200 |
| H  | 6.29258000  | -1.47192000 | 2.97069600  | H                                            | 2.95263600   | -3.87350600 | -3.33698700 |
| H  | 6.13917100  | -1.38345100 | -1.23415000 | H                                            | 0.96706900   | -3.69279700 | -1.85745700 |
| C  | 4.42329900  | -1.22346900 | 0.04658800  | C                                            | 1.69999700   | -1.27499000 | -0.60589800 |
| C  | 3.12501700  | -1.15289700 | -0.21862500 | H                                            | 1.51227100   | -2.09968600 | 0.09342400  |
| C  | 1.85492300  | -1.51866300 | 0.24570800  | C                                            | 2.38566600   | 4.44649500  | -1.36781000 |
| H  | 1.53049700  | -2.54953400 | 0.08498400  | C                                            | 2.67291300   | 3.20600100  | -2.22169800 |
| H  | 1.50297000  | -1.11466300 | 1.20695400  | C                                            | 1.90550300   | 2.94325100  | 0.62318200  |
| O  | -0.93127600 | -4.52192100 | -1.45310400 | C                                            | 1.89010500   | 1.98285700  | -1.71676100 |
| Na | -0.10028300 | -2.65252800 | -2.28287400 | C                                            | 2.18186000   | 1.68032000  | -0.22664000 |
| Si | 1.75720000  | -0.26867100 | -1.76922300 | H                                            | 1.32778900   | 4.72019000  | -1.47472500 |
| C  | 2.31503100  | -1.91563400 | -2.72341900 | H                                            | 3.75049700   | 2.98641900  | -2.19958400 |
| H  | 1.69969100  | -2.11054200 | -3.62067400 | H                                            | 0.81507100   | 2.17248100  | -1.82631000 |
| H  | 3.31430600  | -1.72975500 | -3.13015700 | H                                            | 0.83107800   | 3.16429500  | 0.58396800  |
| H  | 2.40979200  | -2.83025300 | -2.12537000 | H                                            | 2.97563000   | 5.30035600  | -1.72139300 |
| C  | 1.17183800  | 0.55590500  | -3.46554500 | H                                            | 2.41363100   | 3.39301800  | -3.27040500 |
| H  | 0.38705700  | -0.06264800 | -3.92897700 | H                                            | 2.16536400   | 2.77216300  | 1.67322900  |
| H  | 0.76148900  | 1.56376300  | -3.34363500 | H                                            | 2.12917200   | 1.11741200  | -2.34244300 |
| H  | 1.97381900  | 0.62191700  | -4.21530800 | H                                            | 3.23891900   | 1.40139800  | -0.11568100 |
| C  | 2.39668200  | 1.37258800  | -0.93668900 | C                                            | 2.68643000   | 4.16444100  | 0.10907500  |
| C  | 3.11614100  | 2.28160600  | -1.73611800 | H                                            | 2.43782800   | 5.03624000  | 0.72532700  |
| C  | 2.19074500  | 1.75036000  | 0.40395100  | H                                            | 3.76441100   | 3.98722100  | 0.23639600  |
| C  | 3.60822000  | 3.48818400  | -1.22792100 | C                                            | 2.06297100   | -2.63257000 | 3.45934300  |
| H  | 3.30134600  | 2.05011800  | -2.78146400 | C                                            | 3.14925300   | -1.92297300 | 2.63830700  |
| C  | 2.66577100  | 2.95634000  | 0.91895800  | C                                            | 0.43262900   | -0.76856400 | 2.93864400  |
| H  | 1.64022400  | 1.09073000  | 1.06935200  | C                                            | 2.93360400   | -0.39964400 | 2.58954700  |
| C  | 3.38500500  | 3.83530800  | 0.10381800  | C                                            | 1.50869500   | 0.03946000  | 2.17090800  |
| H  | 4.16622500  | 4.15706600  | -1.87885700 | H                                            | 2.14299700   | -2.32479600 | 4.51167000  |
| H  | 2.47776100  | 3.20919200  | 1.96003200  | H                                            | 3.16064600   | -2.34150700 | 1.62550600  |

|                                              |              |             |             |   |             |             |             |
|----------------------------------------------|--------------|-------------|-------------|---|-------------|-------------|-------------|
| H                                            | 3.10438800   | -0.00449900 | 3.60113700  | H | 3.84181300  | -1.50485000 | -3.64410300 |
| H                                            | 0.44546800   | -0.41949600 | 3.98063800  | H | 1.76710600  | -0.10043700 | -2.68062900 |
| H                                            | 1.38643300   | 1.07926800  | 2.49579000  | H | 1.47954100  | -2.03774000 | -4.18536800 |
| H                                            | 2.22317100   | -3.71689000 | 3.43937800  | H | 3.89568100  | -1.54280400 | 0.16498700  |
| H                                            | 4.13918900   | -2.12873900 | 3.06278200  | H | 5.01991900  | -2.63057300 | -1.77359600 |
| H                                            | -0.56087000  | -0.52676100 | 2.54598100  | H | 0.32340000  | -0.98713500 | -2.22200500 |
| H                                            | 3.69022200   | 0.07471000  | 1.95426800  | H | 3.65518700  | -3.24715700 | -3.79745300 |
| C                                            | 0.65970100   | -2.28618200 | 2.94278100  | H | 1.38186500  | -3.13753400 | -2.81590800 |
| H                                            | -0.10277700  | -2.76406800 | 3.56938400  | C | 1.97123200  | -1.22235400 | -0.82398000 |
| H                                            | 0.52127300   | -2.69323600 | 1.93246100  | H | 1.54162700  | -2.15045200 | -0.42829500 |
| P                                            | 1.11839400   | 0.24204800  | 0.34027100  | C | 3.51132200  | 4.26888600  | 0.39846400  |
| Cu                                           | -0.98326300  | 0.86667800  | 0.06730800  | C | 3.82547100  | 3.29808000  | -0.74683900 |
| Si                                           | -3.36994600  | 0.63133800  | 0.37713800  | C | 2.32776900  | 2.38995200  | 1.64796500  |
| C                                            | -3.78394900  | 0.43937500  | 2.20997000  | C | 2.77984200  | 2.17643100  | -0.83501600 |
| H                                            | -3.00287000  | -0.08199600 | 2.77244700  | C | 2.63422400  | 1.40465800  | 0.49810300  |
| H                                            | -3.89334600  | 1.43861300  | 2.63934800  | H | 2.57342600  | 4.79713600  | 0.17845700  |
| H                                            | -4.72339000  | -0.10706600 | 2.35136700  | H | 4.82013500  | 2.85677200  | -0.58990800 |
| C                                            | -4.86444200  | 1.27603100  | -0.59046600 | H | 1.80241300  | 2.60544900  | -1.09585600 |
| H                                            | -5.22951100  | 2.20049800  | -0.13527500 | H | 1.33084900  | 2.82580700  | 1.48910700  |
| H                                            | -4.60111800  | 1.50343700  | -1.62798700 | H | 4.29175100  | 5.03472200  | 0.47563900  |
| H                                            | -5.67682100  | 0.54098600  | -0.59718900 | H | 3.86836400  | 3.83268700  | -1.70270100 |
| C                                            | -2.96447800  | -1.08354800 | -0.37020400 | H | 2.29472100  | 1.86635900  | 2.60890800  |
| C                                            | -2.57820000  | -2.17763000 | 0.43133600  | H | 3.04108600  | 1.49358200  | -1.64983100 |
| C                                            | -3.09899800  | -1.31895800 | -1.75449600 | H | 3.58238800  | 0.89720100  | 0.71819000  |
| C                                            | -2.34043800  | -3.43937100 | -0.11660100 | C | 3.37134900  | 3.51747600  | 1.72821000  |
| H                                            | -2.47701700  | -2.04661600 | 1.50567000  | H | 3.09715200  | 4.20922600  | 2.53320400  |
| C                                            | -2.86062900  | -2.57737900 | -2.30971700 | H | 4.34355200  | 3.08584000  | 2.00597700  |
| H                                            | -3.40474900  | -0.50712100 | -2.40986700 | C | 1.11479600  | -3.52027500 | 2.70616000  |
| C                                            | -2.48148100  | -3.64440400 | -1.49153700 | C | 2.40972500  | -2.72436700 | 2.48931700  |
| H                                            | -2.05829700  | -4.26618500 | 0.53043700  | C | -0.25390200 | -1.45811000 | 2.15267100  |
| H                                            | -2.98121100  | -2.72842400 | -3.37935100 | C | 2.21534400  | -1.22605000 | 2.77909900  |
| H                                            | -2.30476300  | -4.62714100 | -1.91973100 | C | 1.01807000  | -0.57734800 | 2.04140000  |
| C                                            | -2.24500600  | 2.53359900  | 0.11241500  | H | 0.83739400  | -3.47807900 | 3.76925400  |
| O                                            | -2.79446700  | 3.22447300  | 0.95979300  | H | 2.75230700  | -2.87238100 | 1.45843400  |
| O                                            | -1.49728900  | 2.76597400  | -0.87124700 | H | 2.02450100  | -1.11510300 | 3.85616000  |
| <b>6B<sup>s</sup></b>                        |              |             |             | H | -0.61312300 | -1.36700400 | 3.18741200  |
| Sum of electronic and thermal Free Energies= | -3476.700932 |             |             | H | 0.78105500  | 0.35648100  | 2.56625200  |
| C                                            | 3.50538500   | -1.38602800 | -0.84613700 | H | 1.27723300  | -4.57814300 | 2.46864200  |
| C                                            | 3.92628200   | -2.55374900 | -1.75580100 | H | 3.20770800  | -3.11162900 | 3.13403900  |
| C                                            | 1.41608500   | -1.05075600 | -2.25705800 | H | -1.05106400 | -1.05959500 | 1.51783600  |
| C                                            | 3.37700300   | -2.38583300 | -3.17915000 | H | 3.14301400  | -0.67552000 | 2.58302000  |
| C                                            | 1.85194000   | -2.20848800 | -3.16870900 | C | -0.03279000 | -2.94955200 | 1.86264600  |
| H                                            | 3.97078500   | -0.46580100 | -1.21999300 | H | -0.96451700 | -3.49006100 | 2.06173400  |
| H                                            | 3.55422100   | -3.49670300 | -1.33042400 | H | 0.17677500  | -3.10527000 | 0.79672900  |

|                                                          |             |             |             |    |             |             |             |
|----------------------------------------------------------|-------------|-------------|-------------|----|-------------|-------------|-------------|
| P                                                        | 1.29001900  | 0.11199300  | 0.31810500  | C  | 3.19422900  | 4.27913500  | -1.55259400 |
| Cu                                                       | -0.45954500 | 1.06169000  | -0.50805400 | C  | 3.61764800  | 3.05126400  | -2.36770900 |
| Si                                                       | -3.82209800 | 1.21302600  | 0.23578900  | C  | 2.73200300  | 2.77735100  | 0.45133900  |
| C                                                        | -3.01430800 | 1.60600600  | 1.91081600  | C  | 2.91372900  | 1.77807100  | -1.87321200 |
| H                                                        | -1.92452300 | 1.53015900  | 1.81750400  | C  | 3.13657100  | 1.52865400  | -0.36264400 |
| H                                                        | -3.24873800 | 2.62797500  | 2.22766200  | H  | 2.12600600  | 4.47489400  | -1.71880100 |
| H                                                        | -3.33416500 | 0.92297200  | 2.70532700  | H  | 4.70628600  | 2.91919500  | -2.28891800 |
| C                                                        | -5.67568300 | 1.55214700  | 0.30454600  | H  | 1.83262200  | 1.86291000  | -2.05159500 |
| H                                                        | -5.85107500 | 2.61426400  | 0.50235500  | H  | 1.64481600  | 2.92165200  | 0.39134400  |
| H                                                        | -6.14355600 | 1.31717500  | -0.65618100 | H  | 3.73552900  | 5.16944300  | -1.89358900 |
| H                                                        | -6.17779400 | 0.96738600  | 1.08320600  | H  | 3.39797800  | 3.19960500  | -3.43158700 |
| C                                                        | -3.50858900 | -0.62350400 | -0.15733700 | H  | 2.97446000  | 2.63929800  | 1.50996800  |
| C                                                        | -3.98689100 | -1.63915700 | 0.69238000  | H  | 3.25609300  | 0.91840600  | -2.45917600 |
| C                                                        | -2.83023100 | -1.02440400 | -1.32510800 | H  | 4.20321200  | 1.33321100  | -0.19049400 |
| C                                                        | -3.80276900 | -2.99119200 | 0.39392200  | C  | 3.43807900  | 4.04617800  | -0.05652600 |
| H                                                        | -4.52073700 | -1.37555600 | 1.60357600  | H  | 3.09371600  | 4.90819200  | 0.52666000  |
| C                                                        | -2.64872300 | -2.37537200 | -1.63444300 | H  | 4.51892400  | 3.95758900  | 0.12531400  |
| H                                                        | -2.44848600 | -0.26446800 | -2.00109600 | C  | 2.87415700  | -2.53679900 | 3.56355200  |
| C                                                        | -3.13296100 | -3.36284400 | -0.77435500 | C  | 3.99500500  | -1.71827000 | 2.90439100  |
| H                                                        | -4.18946100 | -3.75361400 | 1.06549400  | C  | 1.14022000  | -0.92861200 | 2.65490800  |
| H                                                        | -2.13613000 | -2.65645500 | -2.55120600 | C  | 3.60138600  | -0.24126500 | 2.72287800  |
| H                                                        | -2.99691700 | -4.41384700 | -1.01515600 | C  | 2.23477900  | -0.02448800 | 2.03116300  |
| C                                                        | -2.98426400 | 2.30369300  | -1.11640900 | H  | 2.72603300  | -2.18194700 | 4.59346000  |
| O                                                        | -3.64752500 | 3.16641100  | -1.68500900 | H  | 4.24567800  | -2.16797600 | 1.93648900  |
| O                                                        | -1.71486800 | 2.07081200  | -1.37381600 | H  | 3.52975400  | 0.21261000  | 3.72170700  |
| <b>TS7B<sup>s</sup></b>                                  |             |             |             | H  | 0.93980800  | -0.53682800 | 3.66220300  |
| Sum of electronic and thermal Free Energies=-3788.458633 |             |             |             | H  | 1.91992800  | 1.00477300  | 2.23986000  |
| C                                                        | 4.58393900  | -1.33265800 | -0.76717300 | H  | 3.17154400  | -3.58964000 | 3.63750200  |
| C                                                        | 5.20347800  | -2.64787200 | -1.27240100 | H  | 4.90856600  | -1.77295100 | 3.50873000  |
| C                                                        | 2.38752600  | -1.94671500 | -1.88224200 | H  | 0.20105300  | -0.82818700 | 2.10037000  |
| C                                                        | 4.52903200  | -3.13390700 | -2.56341000 | H  | 4.39719600  | 0.30555800  | 2.20287600  |
| C                                                        | 3.00895100  | -3.25855300 | -2.38596300 | C  | 1.55136100  | -2.40026600 | 2.79546500  |
| H                                                        | 4.78874300  | -0.54194500 | -1.50013100 | H  | 0.75506400  | -2.95013400 | 3.31005000  |
| H                                                        | 5.09860800  | -3.41811500 | -0.49510400 | H  | 1.64814400  | -2.86616900 | 1.80500800  |
| H                                                        | 4.74102000  | -2.42021100 | -3.37222600 | P  | 2.16258700  | 0.01341300  | 0.15445500  |
| H                                                        | 2.49666900  | -1.17440000 | -2.65510100 | Cu | 0.10205000  | 0.10847600  | -0.47000600 |
| H                                                        | 2.53666300  | -3.55418300 | -3.33004000 | C  | -2.45374900 | 0.09494600  | -0.06151100 |
| H                                                        | 5.07146600  | -1.02712900 | 0.16496700  | O  | -2.08137100 | -0.26944600 | 1.06756400  |
| H                                                        | 6.27983900  | -2.51163500 | -1.43145200 | O  | -1.66587000 | 0.25033600  | -1.08430200 |
| H                                                        | 1.31024000  | -2.06626200 | -1.72207600 | C  | -3.21945600 | -4.98427200 | 0.15369500  |
| H                                                        | 4.95592800  | -4.09403700 | -2.87587800 | C  | -2.22024800 | -3.86765900 | 0.48844700  |
| H                                                        | 2.79185000  | -4.05900900 | -1.66442700 | C  | -2.18682800 | -2.78550100 | -0.60933700 |
| C                                                        | 3.06062400  | -1.47466400 | -0.57240300 | C  | -4.57205500 | -3.32707100 | -1.22826300 |
| H                                                        | 2.89093300  | -2.26424700 | 0.16979800  | C  | -4.61549400 | -4.41763400 | -0.13996600 |

|                                                          |             |             |             |   |             |             |             |
|----------------------------------------------------------|-------------|-------------|-------------|---|-------------|-------------|-------------|
| H                                                        | -1.47191900 | -2.00415600 | -0.35991600 | H | -4.29397000 | 0.24067100  | 4.47743900  |
| H                                                        | -2.49281600 | -3.38641800 | 1.43578900  | H | -2.49706100 | 0.62125600  | 2.55078200  |
| H                                                        | -1.21446200 | -4.28549300 | 0.62021900  | H | -2.19389900 | -1.07060100 | 4.32497700  |
| H                                                        | -2.86190100 | -5.53560900 | -0.72819300 | H | -5.88683500 | -0.26430900 | 1.04845000  |
| H                                                        | -3.27066700 | -5.70972400 | 0.97461000  | H | -6.40428400 | -0.56908800 | 3.46440700  |
| H                                                        | -5.56502800 | -2.90314000 | -1.39251100 | H | -1.65020400 | -0.77135500 | 1.90924900  |
| H                                                        | -4.24099600 | -3.77156600 | -2.17851800 | H | -4.60023300 | -1.40696700 | 5.01108000  |
| H                                                        | -5.03534600 | -3.98376400 | 0.77684300  | H | -2.98949900 | -2.29403200 | 3.34582100  |
| H                                                        | -5.29685600 | -5.21828500 | -0.45382000 | C | -3.72758000 | -0.59517600 | 1.22879400  |
| H                                                        | -1.85623200 | -3.24856000 | -1.55174100 | H | -3.79772700 | -1.66662900 | 1.00046400  |
| C                                                        | -3.56994900 | -2.22974000 | -0.84034500 | C | -3.56393000 | 4.83605200  | -0.88622800 |
| C                                                        | -4.11118200 | -1.02702500 | -0.72097800 | C | -3.72242600 | 4.23605800  | 0.51585100  |
| C                                                        | -5.28580100 | -0.27021000 | -0.83453800 | C | -3.77758400 | 2.50498500  | -1.89029100 |
| H                                                        | -6.08966400 | -0.53136500 | -0.14304200 | C | -3.22517000 | 2.78276500  | 0.56774400  |
| H                                                        | -5.63861400 | -0.11262500 | -1.85568300 | C | -3.92227700 | 1.88593400  | -0.48232800 |
| Si                                                       | -4.16262900 | 1.43905000  | -0.11588200 | H | -2.49525200 | 4.90966000  | -1.13113000 |
| C                                                        | -4.88590000 | 2.43899400  | -1.58412900 | H | -4.78141400 | 4.26859700  | 0.80920000  |
| H                                                        | -5.96272600 | 2.25554300  | -1.64285100 | H | -2.14237900 | 2.75990600  | 0.38101200  |
| H                                                        | -4.71071400 | 3.51308600  | -1.47344200 | H | -2.72113800 | 2.46606600  | -2.19294600 |
| H                                                        | -4.45088100 | 2.12264900  | -2.53928700 | H | -3.96250500 | 5.85676400  | -0.91291000 |
| C                                                        | -5.12462500 | 1.38603900  | 1.52490100  | H | -3.17610300 | 4.83394500  | 1.25440600  |
| H                                                        | -4.91475900 | 2.25987900  | 2.14766100  | H | -4.33907100 | 1.92385100  | -2.62860500 |
| H                                                        | -6.19965900 | 1.34245500  | 1.32791300  | H | -3.37179400 | 2.38179600  | 1.57515000  |
| H                                                        | -4.84830300 | 0.49112500  | 2.09188200  | H | -4.99153900 | 1.82300500  | -0.23824100 |
| C                                                        | -2.70676000 | 2.72636500  | 0.36148300  | C | -4.26657900 | 3.96296800  | -1.93286000 |
| C                                                        | -2.23652900 | 2.85798800  | 1.68172200  | H | -4.11130600 | 4.36829700  | -2.93952600 |
| C                                                        | -2.11351400 | 3.56493900  | -0.60073800 | H | -5.35089000 | 3.98289600  | -1.75287900 |
| C                                                        | -1.26388000 | 3.79709000  | 2.03373600  | C | -5.14428700 | -3.53213300 | -1.60084800 |
| H                                                        | -2.62325500 | 2.20038700  | 2.45558600  | C | -5.93096000 | -2.30581700 | -1.11587500 |
| C                                                        | -1.13578400 | 4.50601200  | -0.26560800 | C | -3.18978900 | -2.04966000 | -2.22717400 |
| H                                                        | -2.41422600 | 3.48678500  | -1.64233500 | C | -5.50091000 | -1.02156500 | -1.84636400 |
| C                                                        | -0.71141900 | 4.63247400  | 1.05945300  | C | -3.97422900 | -0.76617600 | -1.85030000 |
| H                                                        | -0.93883100 | 3.87954400  | 3.06870800  | H | -5.38914500 | -3.72742300 | -2.65467300 |
| H                                                        | -0.71353600 | 5.14776700  | -1.03630700 | H | -5.78986700 | -2.19539800 | -0.03472100 |
| H                                                        | 0.03620800  | 5.37443800  | 1.32965700  | H | -5.81402700 | -1.11153800 | -2.89644000 |
| <b>TS8B<sup>s</sup></b>                                  |             |             |             | H | -3.34775300 | -2.22463600 | -3.30050600 |
| Sum of electronic and thermal Free Energies=-3788.488161 |             |             |             | H | -3.76826600 | -0.04904600 | -2.65377300 |
| C                                                        | -5.09116000 | -0.14284200 | 1.79116000  | H | -5.45053600 | -4.42263900 | -1.03989700 |
| C                                                        | -5.44559000 | -0.92522900 | 3.06855400  | H | -7.00576800 | -2.45998800 | -1.26840700 |
| C                                                        | -2.61908200 | -0.44036100 | 2.29835100  | H | -2.11564500 | -1.87285200 | -2.09781100 |
| C                                                        | -4.34566200 | -0.80204200 | 4.13289600  | H | -6.04094800 | -0.15439000 | -1.44817000 |
| C                                                        | -2.97750300 | -1.21858400 | 3.57360600  | C | -3.63090400 | -3.30977600 | -1.47027200 |
| H                                                        | -5.05132800 | 0.92654000  | 2.03345700  | H | -3.08396100 | -4.17533400 | -1.86140700 |
| H                                                        | -5.58845600 | -1.98502800 | 2.81329300  | H | -3.35803400 | -3.23406600 | -0.40941100 |

|    |             |             |             |                                              |              |             |             |
|----|-------------|-------------|-------------|----------------------------------------------|--------------|-------------|-------------|
| P  | -3.19889900 | 0.15905000  | -0.40992600 | H                                            | 9.07902500   | 2.81955500  | -0.28318600 |
| Cu | -1.05047400 | 0.12719200  | -0.56895300 | <b>TS9B<sup>s</sup></b>                      |              |             |             |
| C  | 4.02162600  | -2.75207400 | -1.78392800 | Sum of electronic and thermal Free Energies= | -3828.435538 |             |             |
| C  | 5.29135900  | -3.54907800 | -1.40168400 | C                                            | -5.28803500  | 1.95566700  | -0.84991500 |
| C  | 3.38125400  | -2.54194600 | 0.62876600  | C                                            | -6.12328000  | 2.11333500  | 0.43733400  |
| C  | 5.10300400  | -4.29479800 | -0.07449500 | C                                            | -3.38593600  | 3.24105300  | 0.22153500  |
| C  | 4.64448600  | -3.34094300 | 1.03553700  | C                                            | -5.72934800  | 3.38531200  | 1.20367400  |
| H  | 3.20339800  | -3.46966200 | -1.95246200 | C                                            | -4.22343500  | 3.41007100  | 1.50692700  |
| H  | 6.13156400  | -2.84784500 | -1.31684700 | H                                            | -5.57423300  | 2.77643600  | -1.53544100 |
| H  | 4.34869500  | -5.08405300 | -0.20681900 | H                                            | -5.94939100  | 1.23816400  | 1.07810100  |
| H  | 2.55964400  | -3.25973100 | 0.48587100  | H                                            | -5.98728800  | 4.26567900  | 0.59385300  |
| H  | 4.43692500  | -3.89550800 | 1.95870300  | H                                            | -3.52772800  | 4.14858800  | -0.39466000 |
| H  | 4.18763900  | -2.20651200 | -2.71436600 | H                                            | -3.95723300  | 4.34271400  | 2.02647400  |
| H  | 5.54197300  | -4.24940800 | -2.20764500 | H                                            | -5.52893000  | 1.01531600  | -1.35431300 |
| H  | 3.06270800  | -1.88096300 | 1.42919000  | H                                            | -7.19862700  | 2.13010000  | 0.20586300  |
| H  | 6.03396100  | -4.79835800 | 0.21413500  | H                                            | -2.32026000  | 3.20025600  | 0.47514700  |
| H  | 5.45341900  | -2.63495400 | 1.26736500  | H                                            | -6.30911300  | 3.47202500  | 2.13373300  |
| C  | 3.60390600  | -1.81222000 | -0.67163000 | H                                            | -3.98405000  | 2.58653600  | 2.19335200  |
| C  | 3.67050500  | -0.43919700 | -0.86819700 | C                                            | -3.79205700  | 1.99820900  | -0.57260900 |
| C  | 3.73204100  | 0.21506100  | -2.07883000 | C                                            | -2.95761600  | 1.03918000  | -0.99243600 |
| H  | 3.23559400  | -0.17235800 | -2.96497800 | C                                            | -1.54658500  | 0.92253500  | -0.79758200 |
| H  | 4.14567700  | 1.21400100  | -2.15991300 | H                                            | -0.95941500  | 1.43042600  | -1.57074400 |
| C  | 1.38266500  | -0.25370700 | 0.37466900  | H                                            | -1.12718500  | 1.16603300  | 0.20729400  |
| O  | 0.89494100  | -0.73907100 | 1.39134400  | C                                            | 3.35999800   | 1.31196700  | 2.05158500  |
| O  | 0.81313700  | 0.12652400  | -0.70419900 | C                                            | 3.85453200   | 2.63847300  | 2.65727300  |
| Si | 3.61487800  | 0.85861300  | 0.61960000  | C                                            | 1.62240400   | 2.56247200  | 0.73934000  |
| C  | 3.73365100  | 0.35286200  | 2.44986500  | C                                            | 2.73132300   | 3.68289000  | 2.72373900  |
| H  | 3.99870400  | 1.24582800  | 3.02872700  | C                                            | 2.09792600   | 3.89379100  | 1.34162700  |
| H  | 2.78421200  | -0.03875700 | 2.82151200  | H                                            | 2.57628600   | 0.89588600  | 2.69363800  |
| H  | 4.51630800  | -0.38906600 | 2.63670100  | H                                            | 4.68394800   | 3.03315500  | 2.04998100  |
| C  | 2.51516000  | 2.40647400  | 0.42890800  | H                                            | 1.95811700   | 3.32937000  | 3.41821900  |
| H  | 2.12146400  | 2.49213700  | -0.58670100 | H                                            | 0.84507800   | 2.12626400  | 1.37637700  |
| H  | 1.66491400  | 2.34788600  | 1.11408000  | H                                            | 1.25227100   | 4.58905300  | 1.41267000  |
| H  | 3.07835700  | 3.31419300  | 0.66949900  | H                                            | 4.19296000   | 0.59999800  | 2.02148300  |
| C  | 5.41172700  | 1.53379000  | 0.29380400  | H                                            | 4.26290200   | 2.45499900  | 3.65983500  |
| C  | 5.67183600  | 2.77246500  | -0.31901200 | H                                            | 1.17017500   | 2.73879000  | -0.24259200 |
| C  | 6.53236500  | 0.77523500  | 0.68203400  | H                                            | 3.11299200   | 4.63197600  | 3.12330400  |
| C  | 6.97507700  | 3.23462200  | -0.52876300 | H                                            | 2.83431500   | 4.36384500  | 0.67094500  |
| H  | 4.84466500  | 3.39832500  | -0.64514800 | C                                            | 2.77307000   | 1.53546700  | 0.64316600  |
| C  | 7.83773600  | 1.22672100  | 0.48397700  | H                                            | 3.57114200   | 1.95661400  | 0.02006300  |
| H  | 6.38732600  | -0.19552900 | 1.15276100  | C                                            | 3.76245700   | -4.27442200 | 1.16540600  |
| C  | 8.06442700  | 2.46329100  | -0.12489500 | C                                            | 3.70184900   | -3.12533300 | 2.17896500  |
| H  | 7.13731100  | 4.19782200  | -1.00689100 | C                                            | 3.30221400   | -2.59883500 | -0.69943900 |
| H  | 8.67844300  | 0.61475400  | 0.80239200  | C                                            | 2.79948000   | -1.98336200 | 1.68492400  |

|    |             |             |             |                                                          |             |             |             |
|----|-------------|-------------|-------------|----------------------------------------------------------|-------------|-------------|-------------|
| C  | 3.26382100  | -1.43270300 | 0.31588600  | C                                                        | -0.51870600 | -2.80089600 | -1.85154900 |
| H  | 2.76765600  | -4.73400500 | 1.08425800  | H                                                        | 0.41915300  | -2.54969900 | -2.36309600 |
| H  | 4.71907400  | -2.74331400 | 2.35576000  | H                                                        | -0.26964600 | -3.31191200 | -0.91512400 |
| H  | 1.76798200  | -2.33991400 | 1.58656300  | H                                                        | -1.05335400 | -3.52246700 | -2.48658600 |
| H  | 2.28075000  | -2.96690400 | -0.85989000 | C                                                        | -3.19348300 | -1.97197700 | -0.83865600 |
| H  | 4.44652800  | -5.06170700 | 1.50886800  | C                                                        | -4.42926000 | -1.92085300 | -1.50997200 |
| H  | 3.33494100  | -3.48981700 | 3.14669500  | C                                                        | -3.13662000 | -2.71773700 | 0.35368300  |
| H  | 3.67110200  | -2.26851300 | -1.67428400 | C                                                        | -5.55619900 | -2.58667100 | -1.02309800 |
| H  | 2.76440100  | -1.19174500 | 2.43394600  | H                                                        | -4.51109100 | -1.33299400 | -2.41913000 |
| H  | 4.28595700  | -1.03771800 | 0.42183400  | C                                                        | -4.26690600 | -3.37036800 | 0.85714800  |
| C  | 4.19135400  | -3.75704200 | -0.21276900 | H                                                        | -2.20764500 | -2.75486100 | 0.91662600  |
| H  | 4.17138700  | -4.56916600 | -0.95103700 | C                                                        | -5.47902000 | -3.31305200 | 0.16804500  |
| H  | 5.23459700  | -3.41072900 | -0.15934700 | H                                                        | -6.49854700 | -2.52623800 | -1.56419600 |
| C  | 3.98216700  | 2.63146200  | -3.34989600 | H                                                        | -4.19864300 | -3.92436300 | 1.79153300  |
| C  | 4.81677200  | 1.70727700  | -2.45431800 | H                                                        | -6.35743400 | -3.82456700 | 0.55675200  |
| C  | 1.91222100  | 1.24705700  | -2.87284300 | <b>TS10B<sup>s</sup></b>                                 |             |             |             |
| C  | 4.22820800  | 0.28629200  | -2.38682900 | Sum of electronic and thermal Free Energies=-3828.468160 |             |             |             |
| C  | 2.71011900  | 0.19333100  | -2.06400700 | C                                                        | -0.95183300 | 3.76233100  | 1.29933300  |
| H  | 4.02765100  | 2.27027600  | -4.38821900 | C                                                        | -0.23546600 | 5.06286900  | 0.88042800  |
| H  | 4.87899600  | 2.14336600  | -1.45014600 | C                                                        | -2.40975000 | 3.88308700  | -0.75855900 |
| H  | 4.37512200  | -0.17541900 | -3.37554000 | C                                                        | -1.14792100 | 5.94985400  | 0.01963700  |
| H  | 1.87464500  | 0.89841500  | -3.91575700 | C                                                        | -1.69602300 | 5.18085000  | -1.19244200 |
| H  | 2.37002300  | -0.77443100 | -2.44989800 | H                                                        | -1.77471200 | 4.03924200  | 1.98324200  |
| H  | 4.40573500  | 3.64388300  | -3.35184400 | H                                                        | 0.66309800  | 4.80478900  | 0.30166400  |
| H  | 5.84896900  | 1.64713800  | -2.82407900 | H                                                        | -1.99372800 | 6.29522100  | 0.63413500  |
| H  | 0.87337700  | 1.27414300  | -2.53212100 | H                                                        | -3.31264000 | 4.17163800  | -0.19126400 |
| H  | 4.81525700  | -0.31743300 | -1.68696800 | H                                                        | -2.37518100 | 5.82306400  | -1.77209000 |
| C  | 2.52021400  | 2.65802200  | -2.88536500 | H                                                        | -0.27914000 | 3.11012200  | 1.86287200  |
| H  | 1.92217700  | 3.30070200  | -3.54316700 | H                                                        | 0.10753100  | 5.62024500  | 1.76385700  |
| H  | 2.47003900  | 3.10801800  | -1.88738800 | H                                                        | -2.75784700 | 3.33393300  | -1.64013200 |
| P  | 2.14903000  | -0.01240400 | -0.26070500 | H                                                        | -0.61334800 | 6.85270900  | -0.30790100 |
| Cu | -0.05545800 | -0.42608700 | 0.03198500  | H                                                        | -0.86117300 | 4.92046100  | -1.85864600 |
| C  | -0.26296300 | -0.74530300 | 2.82760400  | C                                                        | -1.51380800 | 3.00465300  | 0.10834500  |
| O  | -0.46941800 | -1.41007700 | 1.74753500  | C                                                        | -1.22197800 | 1.71568700  | -0.12993300 |
| O  | 0.27969500  | 0.37382300  | 2.91054400  | C                                                        | -1.79154400 | 0.88170400  | -1.20442900 |
| C  | -0.74244600 | -1.44398900 | 4.10452900  | H                                                        | -2.86837100 | 0.99536800  | -1.38011600 |
| H  | -0.49044200 | -0.85641700 | 4.98992300  | H                                                        | -1.26143000 | 0.89860400  | -2.16234500 |
| H  | -1.82710400 | -1.58680900 | 4.05648900  | C                                                        | 3.59433400  | -0.66628000 | 1.80329900  |
| H  | -0.29229400 | -2.43988600 | 4.17902900  | C                                                        | 4.65805800  | 0.11230900  | 2.59884200  |
| Si | -1.62120300 | -1.19581300 | -1.57518100 | C                                                        | 2.23331200  | 1.43854300  | 1.57009100  |
| C  | -1.81635400 | -0.66593300 | -3.39182000 | C                                                        | 4.04349200  | 1.30445200  | 3.34548300  |
| H  | -0.83070500 | -0.60646500 | -3.87179300 | C                                                        | 3.28126200  | 2.21987900  | 2.37745200  |
| H  | -2.39833200 | -1.41217000 | -3.94715600 | H                                                        | 2.85692500  | -1.07728200 | 2.49791000  |
| H  | -2.33082800 | 0.29319900  | -3.47889100 | H                                                        | 5.43935200  | 0.47691300  | 1.91320700  |

|   |            |             |             |                                              |              |             |             |
|---|------------|-------------|-------------|----------------------------------------------|--------------|-------------|-------------|
| H | 3.34409900 | 0.92592700  | 4.10299700  | P                                            | 1.58128700   | -0.53438300 | -0.35437900 |
| H | 1.47276400 | 1.02517700  | 2.24056300  | Cu                                           | -0.63106700  | -0.12155500 | 0.21029700  |
| H | 2.79286700 | 3.03413200  | 2.92821700  | C                                            | -0.53378600  | -1.32530600 | 2.91801200  |
| H | 4.07882900 | -1.50229200 | 1.28517000  | O                                            | 0.67328600   | -1.06249300 | 3.06134200  |
| H | 5.15722500 | -0.56349200 | 3.30651500  | O                                            | -1.24721900  | -1.13644500 | 1.86790800  |
| H | 1.70754200 | 2.10819800  | 0.88432200  | C                                            | -1.30397000  | -1.94307200 | 4.09589600  |
| H | 4.82216700 | 1.86597100  | 3.88005500  | H                                            | -2.06654300  | -1.23761500 | 4.44486900  |
| H | 3.99972300 | 2.69651800  | 1.69145400  | H                                            | -1.82893600  | -2.84829700 | 3.77325000  |
| C | 2.87030500 | 0.26021100  | 0.80340000  | H                                            | -0.62810900  | -2.17963500 | 4.92085800  |
| H | 3.64114800 | 0.66196400  | 0.13550700  | Si                                           | -2.37922900  | -1.29633100 | -1.08859200 |
| C | 1.65883400 | -5.26667800 | -0.83388400 | C                                            | -4.14293600  | -0.99646100 | -0.40882300 |
| C | 2.14603600 | -4.64659700 | 0.48225800  | C                                            | -5.25358200  | -0.79187200 | -1.24798200 |
| C | 1.67939900 | -2.94393900 | -1.89340100 | C                                            | -4.37295900  | -0.97751100 | 0.98212600  |
| C | 1.70221500 | -3.18187200 | 0.61758000  | C                                            | -6.53696800  | -0.58527700 | -0.73303600 |
| C | 2.18098600 | -2.31844100 | -0.57257600 | H                                            | -5.12018000  | -0.79531000 | -2.32783800 |
| H | 0.56195700 | -5.32476600 | -0.81763000 | C                                            | -5.65227000  | -0.76947100 | 1.50181100  |
| H | 3.24470800 | -4.70337500 | 0.52414800  | H                                            | -3.52857900  | -1.11424000 | 1.65428600  |
| H | 0.60924900 | -3.12922600 | 0.66422400  | C                                            | -6.74065200  | -0.57494300 | 0.64729700  |
| H | 0.58543800 | -2.86879600 | -1.92952600 | H                                            | -7.37579600  | -0.43142500 | -1.40934500 |
| H | 2.02683100 | -6.29618300 | -0.93976300 | H                                            | -5.80049900  | -0.75520200 | 2.57968600  |
| H | 1.77311600 | -5.22622000 | 1.33634400  | H                                            | -7.73679200  | -0.41286000 | 1.05363300  |
| H | 2.05427900 | -2.39299100 | -2.76027900 | C                                            | -2.05189500  | -3.09899600 | -0.49899200 |
| H | 2.04845600 | -2.77078900 | 1.56579700  | H                                            | -1.16266000  | -3.53643300 | -0.96041400 |
| H | 3.28177500 | -2.32468400 | -0.59240600 | H                                            | -1.92386500  | -3.11271100 | 0.58542300  |
| C | 2.10157900 | -4.41763900 | -2.03277200 | H                                            | -2.91428100  | -3.72472900 | -0.76499400 |
| H | 1.69593300 | -4.83158100 | -2.96563300 | C                                            | -2.52294900  | -1.48915400 | -2.98811500 |
| H | 3.19733900 | -4.46741400 | -2.12262300 | H                                            | -3.23639700  | -2.27932600 | -3.25213100 |
| C | 4.03602200 | 2.38095600  | -2.72359100 | H                                            | -2.83804600  | -0.57055100 | -3.49478700 |
| C | 4.50144500 | 0.94627500  | -2.44785500 | H                                            | -1.55087600  | -1.77743900 | -3.40706400 |
| C | 1.63708700 | 1.71809100  | -2.20522500 | <b>TS11B*</b>                                |              |             |             |
| C | 3.38551400 | -0.08233200 | -2.70740600 | Sum of electronic and thermal Free Energies= | -3476.661084 |             |             |
| C | 2.00162200 | 0.21493200  | -2.05756400 | C                                            | -3.75214900  | -0.44246200 | 1.62698800  |
| H | 3.81242100 | 2.49109000  | -3.79570100 | C                                            | -4.30535600  | -1.41042500 | 2.68750100  |
| H | 4.85326000 | 0.87656600  | -1.41172500 | C                                            | -1.38338700  | -1.03217700 | 2.33183500  |
| H | 3.22568100 | -0.11638200 | -3.79662100 | C                                            | -3.33929100  | -1.56477700 | 3.87043800  |
| H | 1.33236800 | 1.87934400  | -3.25110100 | C                                            | -1.94310000  | -1.99073500 | 3.39565900  |
| H | 1.26308800 | -0.31969700 | -2.66744100 | H                                            | -3.68542600  | 0.56011400  | 2.06540900  |
| H | 4.84071300 | 3.09273000  | -2.49708200 | H                                            | -4.47630300  | -2.39372300 | 2.22630900  |
| H | 5.36569100 | 0.69655500  | -3.07848100 | H                                            | -3.26468200  | -0.60620000 | 4.40317600  |
| H | 0.76950300 | 1.96137700  | -1.58471400 | H                                            | -1.20289900  | -0.05028900 | 2.78669000  |
| H | 3.74592300 | -1.07766400 | -2.42902300 | H                                            | -1.25058100  | -2.04457200 | 4.24364700  |
| C | 2.77882300 | 2.70293500  | -1.90745700 | H                                            | -4.45344000  | -0.36821200 | 0.79027100  |
| H | 2.43334100 | 3.72152000  | -2.12530200 | H                                            | -5.28301100  | -1.05593300 | 3.03499200  |
| H | 3.02688200 | 2.68754600  | -0.84020500 | H                                            | -0.41239900  | -1.39258900 | 1.97755900  |

|    |             |             |             |                                                           |             |             |             |
|----|-------------|-------------|-------------|-----------------------------------------------------------|-------------|-------------|-------------|
| H  | -3.73372300 | -2.29099400 | 4.59063400  | H                                                         | 3.67585700  | -2.19279100 | -2.53974600 |
| H  | -1.99713500 | -3.00419900 | 2.97316100  | C                                                         | 2.31026200  | 1.35725600  | -0.74656200 |
| C  | -2.35651000 | -0.88819100 | 1.13898500  | O                                                         | 2.98384500  | 1.66125000  | -1.72393100 |
| H  | -2.45995300 | -1.88704800 | 0.69598200  | O                                                         | 1.72722200  | 2.01789000  | 0.15271000  |
| C  | -1.58258700 | 4.80893800  | 0.27091800  | C                                                         | 1.93676900  | -2.28256400 | 0.28510600  |
| C  | -2.03637500 | 3.95882700  | 1.46346700  | H                                                         | 1.72266400  | -2.05536400 | 1.33470900  |
| C  | -1.77052700 | 2.76957400  | -1.23226400 | H                                                         | 1.00142700  | -2.59446500 | -0.19024300 |
| C  | -1.65123300 | 2.48221800  | 1.27815100  | H                                                         | 2.61055200  | -3.14959500 | 0.27436800  |
| C  | -2.21777500 | 1.89434100  | -0.03749600 | C                                                         | 4.46393800  | -0.58982900 | 0.17377600  |
| H  | -0.48572600 | 4.80407300  | 0.22184600  | C                                                         | 5.43213400  | 0.28480400  | -0.35870200 |
| H  | -3.12674100 | 4.04231400  | 1.58104900  | C                                                         | 4.81663600  | -1.32204900 | 1.32257100  |
| H  | -0.55796500 | 2.39496700  | 1.25372700  | C                                                         | 6.69284500  | 0.41156600  | 0.22401700  |
| H  | -0.67983200 | 2.68857300  | -1.33290600 | H                                                         | 5.18260800  | 0.88976800  | -1.22472900 |
| H  | -1.89258100 | 5.85207700  | 0.40395400  | C                                                         | 6.07545700  | -1.19236000 | 1.91452200  |
| H  | -1.59205800 | 4.33361600  | 2.39286000  | H                                                         | 4.10388200  | -2.00762500 | 1.77166100  |
| H  | -2.21073700 | 2.40934400  | -2.16809500 | C                                                         | 7.01990900  | -0.32674500 | 1.36370700  |
| H  | -1.99914100 | 1.90619300  | 2.14096900  | H                                                         | 7.41981800  | 1.09379400  | -0.20900800 |
| H  | -3.31534100 | 1.88892100  | 0.01250600  | H                                                         | 6.31658000  | -1.76881000 | 2.80409600  |
| C  | -2.14905300 | 4.24725800  | -1.03855100 | H                                                         | 8.00088100  | -0.22437500 | 1.82022700  |
| H  | -1.78615600 | 4.82738400  | -1.89484900 | <b>TS12B<sup>s</sup></b>                                  |             |             |             |
| H  | -3.24454200 | 4.34358200  | -1.03599100 | Sum of electronic and thermal Free Energies= -3990.791657 |             |             |             |
| C  | -3.64381500 | -3.10082500 | -2.33457700 | C                                                         | -1.73842100 | 3.51704400  | 0.95826600  |
| C  | -4.40264900 | -1.93714000 | -1.68065500 | C                                                         | -1.00055500 | 4.84760100  | 0.70018300  |
| C  | -1.55560500 | -1.67947800 | -2.47340600 | C                                                         | -2.54032300 | 3.48538400  | -1.44364800 |
| C  | -3.82351100 | -0.56962200 | -2.08517900 | C                                                         | -1.67422300 | 5.64951700  | -0.42255200 |
| C  | -2.29009100 | -0.43763600 | -1.90706100 | C                                                         | -1.80153600 | 4.81539500  | -1.70531000 |
| H  | -3.78832800 | -3.06451400 | -3.42366900 | H                                                         | -2.73489000 | 3.76686400  | 1.36634100  |
| H  | -4.37151700 | -2.05937200 | -0.59197300 | H                                                         | 0.03687200  | 4.62594400  | 0.41462200  |
| H  | -4.03377800 | -0.41964800 | -3.15366400 | H                                                         | -2.67695400 | 5.95930500  | -0.09291600 |
| H  | -1.62726100 | -1.62632900 | -3.56872800 | H                                                         | -3.58220800 | 3.72645700  | -1.17429100 |
| H  | -1.96808100 | 0.40600100  | -2.52882400 | H                                                         | -2.32101200 | 5.38967200  | -2.48301600 |
| H  | -4.05781600 | -4.05811200 | -1.99722600 | H                                                         | -1.20752400 | 2.93380400  | 1.72023400  |
| H  | -5.46249800 | -1.97122400 | -1.95969100 | H                                                         | -0.95590500 | 5.44173600  | 1.62152200  |
| H  | -0.48806600 | -1.62131400 | -2.23423600 | H                                                         | -2.58143800 | 2.88786100  | -2.36016300 |
| H  | -4.34840400 | 0.23866400  | -1.56320100 | H                                                         | -1.11438500 | 6.57180600  | -0.62163600 |
| C  | -2.14199200 | -3.02556900 | -2.02661900 | H                                                         | -0.79770500 | 4.59479300  | -2.09376900 |
| H  | -1.60785700 | -3.83828700 | -2.53219800 | C                                                         | -1.89041200 | 2.69255200  | -0.31422100 |
| H  | -1.97762400 | -3.17628000 | -0.95113700 | C                                                         | -1.43085800 | 1.42914600  | -0.41641100 |
| P  | -1.60669900 | 0.13271900  | -0.25005600 | C                                                         | -1.58105100 | 0.52977300  | -1.57498600 |
| Cu | 0.58642200  | 0.28616200  | -0.31454800 | H                                                         | -2.59541000 | 0.44981200  | -1.97682700 |
| Si | 2.76947500  | -0.82273900 | -0.65442700 | H                                                         | -0.87002400 | 0.63226800  | -2.39986500 |
| C  | 2.95400800  | -1.37261800 | -2.45471800 | C                                                         | 3.37300900  | -0.36063200 | 2.16328300  |
| H  | 1.99902400  | -1.72377800 | -2.86186400 | C                                                         | 4.15907000  | 0.47649800  | 3.18792400  |
| H  | 3.29963100  | -0.53546600 | -3.06445800 | C                                                         | 1.82358300  | 1.57916900  | 1.76090100  |



|   |            |             |             |    |             |             |             |
|---|------------|-------------|-------------|----|-------------|-------------|-------------|
| C | 3.27665400 | 1.54550200  | 3.84687700  | H  | 4.24784000  | -0.46616500 | -2.14470400 |
| C | 2.59167500 | 2.42352800  | 2.79080100  | C  | 2.74957100  | 3.12601700  | -1.48531200 |
| H | 2.58222300 | -0.91138800 | 2.68838800  | H  | 2.31148800  | 4.10999300  | -1.69292500 |
| H | 5.00507000 | 0.96327400  | 2.68141600  | H  | 2.85253700  | 3.06305800  | -0.39590300 |
| H | 2.50762000 | 1.05135700  | 4.45749400  | P  | 1.81227600  | -0.33868900 | -0.32970300 |
| H | 0.99973700 | 1.05203100  | 2.25799500  | Cu | -0.57293800 | -0.34305900 | -0.03695800 |
| H | 1.90759900 | 3.13351700  | 3.27118100  | C  | -1.03717400 | -1.26264500 | 2.88819400  |
| H | 4.04145400 | -1.10429300 | 1.71713600  | O  | -0.63803000 | -1.44212100 | 1.68347600  |
| H | 4.59193500 | -0.18423200 | 3.94917300  | C  | -0.39970600 | -2.16805300 | 3.93751900  |
| H | 1.35004700 | 2.22678000  | 1.01782900  | H  | -1.02009700 | -2.21869500 | 4.83384200  |
| H | 3.87078600 | 2.16148300  | 4.53276200  | H  | -0.22805300 | -3.16809100 | 3.53282300  |
| H | 3.35185300 | 3.02654600  | 2.27254800  | H  | 0.57541200  | -1.75328900 | 4.21842100  |
| C | 2.74138000 | 0.53754300  | 1.08160200  | Si | -1.99090300 | -1.77063300 | -1.38466200 |
| H | 3.56635400 | 1.07372200  | 0.59995200  | C  | -3.73944400 | -1.51878700 | -0.64904300 |
| C | 2.63187100 | -4.98193400 | -1.03082700 | C  | -4.78843600 | -0.90351600 | -1.36257300 |
| C | 2.88064500 | -4.39073400 | 0.36212100  | C  | -4.00811500 | -1.87751100 | 0.68990700  |
| C | 2.38083800 | -2.61393600 | -1.94639300 | C  | -6.02881500 | -0.64374300 | -0.77311800 |
| C | 2.19857900 | -3.02312200 | 0.53201800  | H  | -4.64216200 | -0.62891000 | -2.40468400 |
| C | 2.65746000 | -2.01427300 | -0.54735400 | C  | -5.24440900 | -1.61344400 | 1.29154100  |
| H | 1.56357100 | -5.21549800 | -1.13798400 | H  | -3.23504500 | -2.36845800 | 1.27457700  |
| H | 3.96343000 | -4.28103100 | 0.52181000  | C  | -6.25982100 | -0.99069300 | 0.55993700  |
| H | 1.11213900 | -3.13813700 | 0.47178800  | H  | -6.81668100 | -0.17403600 | -1.35625400 |
| H | 1.29533500 | -2.71159400 | -2.08228000 | H  | -5.41526000 | -1.90593900 | 2.32448400  |
| H | 3.17215300 | -5.92887100 | -1.15070300 | H  | -7.22364500 | -0.79103900 | 1.01974700  |
| H | 2.52163600 | -5.07820600 | 1.13770400  | C  | -1.45777800 | -3.49923800 | -0.75857800 |
| H | 2.73322300 | -1.95074500 | -2.74047000 | H  | -0.53908500 | -3.82721300 | -1.25308200 |
| H | 2.39826800 | -2.64279800 | 1.53380400  | H  | -1.28140100 | -3.50716800 | 0.31909300  |
| H | 3.74315900 | -1.86722200 | -0.44683500 | H  | -2.24346900 | -4.22765000 | -0.99581600 |
| C | 3.04670000 | -3.99013200 | -2.12440900 | C  | -2.10778000 | -1.98238400 | -3.27187200 |
| H | 2.80311400 | -4.38864400 | -3.11698800 | H  | -2.76223500 | -2.82470100 | -3.52284900 |
| H | 4.13859100 | -3.86224200 | -2.10129100 | H  | -2.48058900 | -1.09877200 | -3.79856500 |
| C | 4.13714700 | 3.01510100  | -2.12811700 | H  | -1.11485500 | -2.21067900 | -3.67705800 |
| C | 4.73629100 | 1.62568000  | -1.88104200 | O  | -1.88157100 | -0.41131000 | 3.26294800  |
| C | 1.79234700 | 2.03921800  | -2.00202300 | Na | -2.75594700 | 0.52143300  | 1.49028000  |
| C | 3.80757200 | 0.50665800  | -2.38255800 |    |             |             |             |
| C | 2.32813300 | 0.58421100  | -1.90807800 |    |             |             |             |
| H | 4.05179700 | 3.18623300  | -3.21108500 |    |             |             |             |
| H | 4.94226600 | 1.50456300  | -0.81028500 |    |             |             |             |
| H | 3.79003600 | 0.56450100  | -3.48117900 |    |             |             |             |
| H | 1.60817700 | 2.24625600  | -3.06653700 |    |             |             |             |
| H | 1.74343200 | 0.01026100  | -2.63821100 |    |             |             |             |
| H | 4.80501800 | 3.79356000  | -1.74011600 |    |             |             |             |
| H | 5.70547900 | 1.53237000  | -2.38658700 |    |             |             |             |
| H | 0.82431000 | 2.12091400  | -1.49960900 |    |             |             |             |
